# Supplementary material
Source: PubMed Central journal article supplement (PMC4839409)
Supplement: pnas.1525164113.sapp.pdf [file pnas.1525164113.sapp.pdf]

# Supporting Information Appendix

## **Radical remodeling of the Y chromosome in a recent radiation of malaria mosquitoes**

Andrew B. Hall, Philippos-Aris Papathanos, Atashi Sharma, Changde Cheng, Omar S. Akbari, Lauren Assour, Nicholas H. Bergman, Alessia Cagnetti, Andrea Crisanti, Tania Dottorini, Elisa Fiorentini, Roberto Galizi, Jonathan Hnath, Xiaofang Jiang, Sergey Koren, Tony Nolan, Diana Radune, Maria V. Sharakhova, Aaron Steele, Vladimir A. Timoshevskiy, Nikolai Windbichler, Simo Zhang, Matthew W. Hahn, Adam M. Phillippy, Scott J. Emrich, Igor V. Sharakhov<sup>\*</sup>, Zhijian Tu<sup>\*</sup>, Nora J. Besansky<sup>\*</sup>

<sup>\*</sup> correspondence to: [igor@vt.edu](mailto:igor@vt.edu); [jake@vt.edu](mailto:jake@vt.edu); [nbesansk@nd.edu](mailto:nbesansk@nd.edu)

## Supporting Information Appendix

### Table of Contents

#### **S1. Genomic and transcriptomic datasets** (figs. S1-S4, tables S1-S3)

S1.1. PacBio WGS sequencing

S1.2. PacBio WGS error-correction and assembly

S1.3. Identification and PacBio sequencing of Y chromosome derived BACs

S1.4. Male and female Illumina WGS of species in the *An. gambiae* complex

S1.5. Illumina WGS of field-collected individuals of *An. gambiae*

S1.6. mRNA-Sequencing (RNA-Seq) datasets

#### **S2. Identification of Y sequences from PacBio WGS** (tables S4-S8)

S2.1. CQ methods and benchmarking

S2.2. Ydb: an extensive catalog of Y chromosome sequences derived from PacBio sequencing

S2.3. Comparison of the CQ method to the Y chromosome Genome Scan (YGS) method

S2.4. Spatial mapping

#### **S3. The *An. gambiae* Y chromosome contains massively amplified satellites and retrotransposons** (figs. S5-S9, table S9)

S3.1. The satellite amplified region (SAR)

S3.2. The *zanzibar* amplified region (ZAR)

S3.3. *changuu*

#### **S4. Fluorescence *in situ* hybridization and estimating size of the Y chromosome** (fig. S10, tables S10-S11)

S4.1. Fluorescence *in situ* hybridization

S4.2. Estimated size of the Y chromosome.

#### **S5. Variation of Y repeats within *An. gambiae* and among species in the *An. gambiae* complex** (fig. S11, tables S12-S15)

S5.1. Copy number variation in individuals from a natural population of *An. gambiae*

S5.2. Repeat variation across the *An. gambiae* complex

#### **S6. Y chromosome recombination**

#### **S7. Small and labile genic repertoire** (figs. S12-S18, tables S16-S20)

S7.1. Identifying candidate Y-linked genes in *An. gambiae*

S7.2. Identification of Y chromosome genes in other members of the *An. gambiae* complex

#### **S8. Phylogeny reconstruction and coalescent simulations** (tables S21-S22)

### References

## **S1. Genomic and transcriptomic datasets**

### **S1.1. PacBio WGS Sequencing**

Twenty adult male offspring of a single pair mating from the *An. gambiae* Pimperena laboratory colony were collected and genomic DNA was extracted. Genomic DNA was quantified by spectrophotometry (Quant-iT PicoGreen, Life Technologies). A library was prepared from this genomic DNA using the Pacific Biosciences recommended protocols and P4-C2 reagents. The resulting sample was sequenced with 58 cells on a Pacific Biosciences RS instrument with 180-minute runtimes. Short insert reads that qualify as circular consensus sequence (CCS) reads were extracted. Further PacBio sequencing was performed with newer P5-C3 chemistry and library preparation techniques. The same genomic DNA from above was sheared by Covaris g-TUBE and a BluePippin instrument was used to select fragments from 15-50 kb in length. A large insert library was prepared using Pacific Biosciences recommended protocols and P5-C3 reagents. The resulting sample was sequenced with 11 cells on a Pacific Biosciences RS sequencing instrument with 180-minute runtimes. The PacBio reads have been submitted to the SRA: SRS667972 (SRX668744 - SRX668812).

### **S1.2. PacBio WGS error-correction and assembly**

A combination of P4-C2 (58 cells) and P5-C3 (11 cells) sequencing produced ~70X and ~35X coverage of autosomes and heterosomes, respectively, with an average read length of 2,479 bp, N50 length of 3,134 bp, and a maximum length of 31,875 bp.

Two sets of corrected reads were produced. The first set includes only the P4-C2 sequences corrected with the Celera Assembler 8.0 PBcR pipeline (1, 2) using BLASR

(3) for overlap detection and AMOS make-consensus (4) for correction. To maximize total bases for Ydb, no quality trimming was performed on the corrected reads. This resulted in a total of 40X corrected sequences with an average read length of 2,449 bp, N50 length of 2,799 bp, and maximum length of 19,353 bp. This set was used to build Ydb (Other Supporting File 1).

The second set of corrected reads includes the longer, but potentially more error-prone P5-C3 sequences. For *de novo* assembly, the combined P4-C2 and P5-C3 reads were corrected with the Celera Assembler 8.1 PBcR pipeline (1, 2). All data was aligned with BLASR (3) to the longest 50X subset (based on a 300 Mb genome size) and consensus correction was performed using PBDAGCON (5). The command to correct the sequences was:

```
pacBioToCA -length 500 -s pacbio.spec -t 32 -partitions 200 -pbCNS -l pbcns -fastq  
filtered_subreads.fastq QV=52.5
```

A total of 25X corrected reads were collected for assembling with an average read length of 2,433 bp, N50 length of 3,161 bp, and a maximum length of 30,325 bp. These sequences were assembled using relaxed parameters to merge haplotypes. The command to subset and assemble the sequences was:

```
runCA -s asm.spec -p asm -d asm pbcns.frg
```

Finally, all raw data were used to re-call a final consensus using Quiver (5) by importing the assembly into SMRTportal v2.1.0 and running the re-sequencing protocol for a diploid genome. Assembled contigs with less than 20 sequences or 2X coverage after Quiver were discarded, resulting in an assembly of 313.7 Mb in 8,322 contigs with a maximum contig length of 4,895,868 bp and an N50 length of 110,347 bp. The assembly was screened for bacterial contamination using Kraken v0.10.4-beta (6). A custom database was built, including *Homo sapiens* (GRCh37), *An. gambiae* Pimperena strain (ABKQ02), *An. gambiae* PEST strain (AAAB01), and NCBI Bacteria and Viruses (NCBI Genomes FTP, May 2014). All contigs were classified using the following commands:

```
kraken --db DB --threads 32 --fastq-input --output kraken.hits --preload pacbio.fastq  
cat kraken.hits | kraken-filter --db DB --threshold 0 > kraken.filtered.hits
```

A total of 5% (~20 Mb) of contigs were classified as Bacterial/Viral and were removed from the final assembly. A contig associated with the mitochondria was identified by reference mapping and the overlapping region was deleted from the 3' end to circularize it. The final assembly has 293.7 Mb in 8,000 contigs with a maximum contig length of 4,670,695 bp and an N50 length of 101,465 bp. The assembly has been submitted to NCBI as LCWJ00000000.

Assembled contigs were validated using Illumina sequences derived from male mosquitos of the same *An. gambiae* Pimperena colony. Illumina reads were aligned to the PacBio assembly using Bowtie (7) and variants (both SNPs and short indels) were called using FreeBayes (8). Variants supported by less than 50% of the mapped Illumina reads

were considered putative errors in the PacBio assembly. For all mapped bases with a minimum coverage of 3 Illumina reads, this technique yielded a PacBio consensus accuracy estimate of 99.97% (or average Phred base quality of Q35). Bowtie was run with the parameters (-I 200 -X 800 -p 32 -f -l 25 -e 140 --best --chunkmbs 256 -k 1 -S --un=unaligned.fasta -q asm-ctg -1 <run>.1.fastq -2 <run>.2.fastq) and FreeBayes with the parameters (freebayes -C 2 -O -q 20 -F 0.5 -z 0.02 -E 0 -X -u -p 1 -b asm.sorted.bam -v asm.vcf -f asm.fasta).

All corrected PacBio reads used for the construction of Ydb were aligned to the validated assembly to assess per-read accuracy. In contrast to the assembly, which used quality-trimmed corrected reads, the full length of the reads was considered for this analysis. Using BLASR, 99.6% of the untrimmed PacBio corrected reads aligned to the assembly, totaling 98.4% of the corrected bases with an average per-read identity of 93.8%. BLASR was run with the parameters (-nproc 16 -bestn 10 -minReadLength 200 -maxScore -1000 -maxLCPLength 16 -m 4).

### **S1.3. Identification and PacBio sequencing of Y chromosome derived BACs**

We retrieved BAC-end sequences from the *An. gambiae* Pimperena strain BAC-library from VectorBase (<https://www.vectorbase.org/download/anopheles-gambiae-s-pimperenabac-ends2012-12fagz>). We identified putative Y-linked BACs with CQs calculated for these BAC-ends using *An. gambiae* G3 strain pooled male and female Illumina data (9). Based on a cutoff of  $CQ < 0.2$ , we selected 8 BACs for PacBio sequencing. BAC DNA was purified using an alkaline lysis preparation at the midi-scale

to reduce host DNA contamination. BAC DNA was quantified by spectrophotometry (Quant-iT PicoGreen, Life Technologies). DNA was sheared by Covaris g-TUBE and a large insert library was prepared using Pacific Biosciences recommended protocols and a BluePippin instrument to select library fragments from 15-50 kb in length. The BAC samples were sequenced on a Pacific Biosciences RS II sequencing instrument with 180-minute runtimes using P5-C3 reagents. Due to low sequencing yield, only four BACs were able to be successfully assembled using HGAP3 in PacBio SMRTportal 2.2.0 (5). All four BAC assemblies have high and uniform coverage of mapped reads (**Fig. S1**). We aligned reads from pooled males and females of *An. gambiae* Pimperena and G3 colonies against the assembled BACs and calculated CQ in 100-bp windows over the entire assembly (**Fig. S2**). Three of the four BACs had CQ<0.2 throughout, while no extended region of the fourth BAC passed the CQ<0.2 threshold and therefore it was considered to be a false positive. The sequencing reads for all four BACs have been submitted to the SRA: SRX1012990 (10L19), SRX1012997 (28P09), SRX1013030 (60P19), and SRX1013031 (46I18). The assemblies have been deposited in NCBI: KR610409 (10L19), KR494253 (28P09), KR610410 (60P19), and KR610411 (46I18).

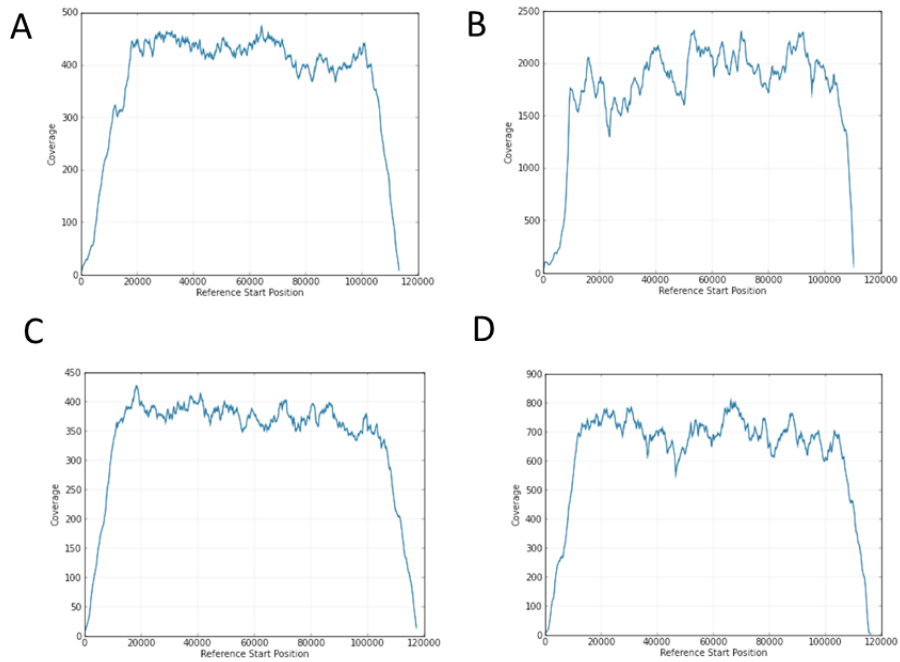

**Figure S1. Coverage of the four PacBio sequenced BACs.** All four BACs have high and uniform supporting coverage of mapped reads. A, 60P19; B, 10L19; C, 28P09; D, 46I18.



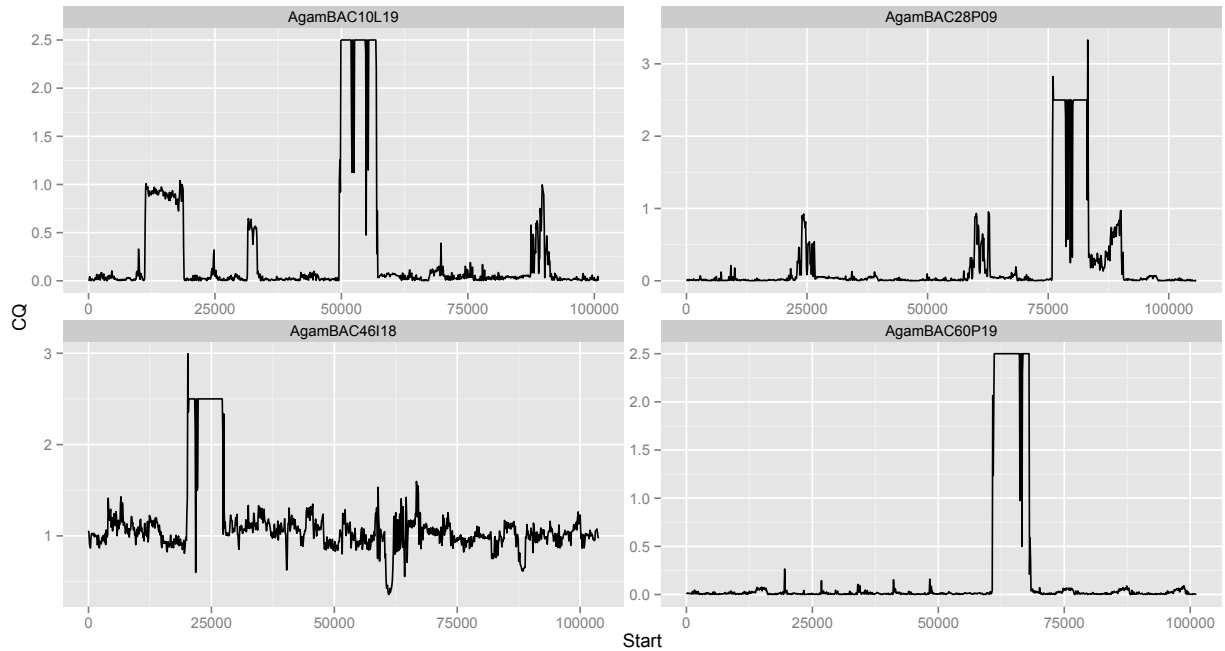

**Figure S2. Ratio of female:male read alignments (CQ) of the four PacBio sequenced BACs in 100-bp non-overlapping windows.** CQ values below the threshold (0.2) are indicative of Y linkage, while CQ=1 (most of BAC46I18) indicates an autosomally-derived BAC. Regions within BACs 10L19, C28P09 and C60P19 whose CQ values do not reflect Y-linkage are repeated on other chromosomes.

#### S1.4. Male and female Illumina WGS of species in the *An. gambiae* complex

Pools of at least 30 males and 30 females from different strains and species of the *An. gambiae* complex were sequenced (**Table S1**). Genomic DNA was isolated from separate pools of males and females of each strain (species) using the DNeasy Blood and Tissue kit (Qiagen Inc., Valencia, CA, USA), as specified by the manufacturer. Each pool was sequenced with 1 lane of Illumina HiSeq2000 and the data were submitted to the SRA (**Table S1**).

**Table S1.** Illumina WGS sequencing data from male and female pools.

| <b>Dataset</b>                           | <b>Reads</b> | <b>SRA Accession</b> |
|------------------------------------------|--------------|----------------------|
| <i>An. gambiae</i> G3 Male               | 52,368,341   | SRR534285            |
| <i>An. gambiae</i> G3 Female             | 59,223,187   | SRR534286            |
| <i>An. gambiae</i> Pimperena Male        | 174,891,782  | SRR1509742           |
| <i>An. gambiae</i> Pimperena Female      | 177,090,932  | SRR1508169           |
| <i>An. gambiae</i> Asembo Male           | 70,209,481   | SRR1504990           |
| <i>An. gambiae</i> Asembo Female         | 61,033,449   | SRR1504983           |
| <i>An. merus</i> MAF Male                | 66,672,308   | SRR1504817           |
| <i>An. merus</i> MAF Female              | 62,883,410   | SRR1504857           |
| <i>An. quadriannulatus</i> SANGWE Male   | 63,214,173   | SRR1508191           |
| <i>An. quadriannulatus</i> SANGWE Female | 59,554,332   | SRR1508190           |
| <i>An. arabiensis</i> Dongola Male       | 67,965,377   | SRR1504818           |
| <i>An. arabiensis</i> Dongola Female     | 73,915,849   | SRR1504792           |

### S1.5. Illumina WGS of field-collected individuals of *An. gambiae*

Collections of indoor resting *An. gambiae* were made by spray catch from five villages in a forest/savanna mosaic zone in the eastern part of Cameroon in Sep-Oct 2009 (10).

Mosquitoes were sorted morphologically to *An. gambiae s.l.* and genomic DNA was isolated from individual mosquitoes using the DNeasy Blood and Tissue kit. Molecular identification to species followed an rDNA-based PCR assay (11). Each of 275 samples was individually sequenced by the Wellcome Trust Sanger Institute using 1 lane of Illumina HiSeq2000 (The *Anopheles gambiae* 1000 Genomes Consortium (2015): Ag1000G phase 1 AR3 data release.

MalariaGEN. <http://www.malariagen.net/data/ag1000g-phase1-AR3>). The 40 male and 45 female genomic sequences employed for this study were used by permission from the Ag1000G Consortium, and are available from the SRA (**Table S2**).

**Table S2.** Male and female *An. gambiae* samples from Cameroon sequenced by the Ag1000G project and used in this study.

| SRA Accession | Region       | Latitude | Longitude | Sex |
|---------------|--------------|----------|-----------|-----|
| ERS224579     | Gado-Badzere | 5.747    | 14.442    | M   |
| ERS224558     | Gado-Badzere | 5.747    | 14.442    | M   |
| ERS224453     | Gado-Badzere | 5.747    | 14.442    | M   |
| ERS224651     | Gado-Badzere | 5.747    | 14.442    | M   |
| ERS224626     | Gado-Badzere | 5.747    | 14.442    | M   |
| ERS224430     | Gado-Badzere | 5.747    | 14.442    | M   |
| ERS224645     | Gado-Badzere | 5.747    | 14.442    | M   |
| ERS224535     | Gado-Badzere | 5.747    | 14.442    | M   |
| ERS224493     | Gado-Badzere | 5.747    | 14.442    | M   |
| ERS224576     | Gado-Badzere | 5.747    | 14.442    | M   |
| ERS224528     | Gado-Badzere | 5.747    | 14.442    | M   |
| ERS224494     | Gado-Badzere | 5.747    | 14.442    | M   |
| ERS224574     | Gado-Badzere | 5.747    | 14.442    | M   |
| ERS224459     | Gado-Badzere | 5.747    | 14.442    | M   |
| ERS224519     | Gado-Badzere | 5.747    | 14.442    | M   |
| ERS224590     | Mayos        | 4.341    | 13.558    | M   |
| ERS224438     | Mayos        | 4.341    | 13.558    | M   |
| ERS224592     | Mayos        | 4.341    | 13.558    | M   |
| ERS224595     | Mayos        | 4.341    | 13.558    | M   |

|           |               |       |        |   |
|-----------|---------------|-------|--------|---|
| ERS224555 | Mayos         | 4.341 | 13.558 | M |
| ERS224506 | Mayos         | 4.341 | 13.558 | M |
| ERS224538 | Mayos         | 4.341 | 13.558 | M |
| ERS224488 | Mayos         | 4.341 | 13.558 | M |
| ERS224501 | Mayos         | 4.341 | 13.558 | M |
| ERS224660 | Mayos         | 4.341 | 13.558 | M |
| ERS224610 | Mayos         | 4.341 | 13.558 | M |
| ERS224836 | Mayos         | 4.341 | 13.558 | M |
| ERS224591 | Mayos         | 4.341 | 13.558 | M |
| ERS224835 | Mayos         | 4.341 | 13.558 | M |
| ERS224525 | Daiguene      | 4.777 | 13.844 | M |
| ERS224654 | Daiguene      | 4.777 | 13.844 | M |
| ERS224655 | Daiguene      | 4.777 | 13.844 | M |
| ERS224516 | Daiguene      | 4.777 | 13.844 | M |
| ERS224638 | Daiguene      | 4.777 | 13.844 | M |
| ERS224560 | Daiguene      | 4.777 | 13.844 | M |
| ERS224839 | Daiguene      | 4.777 | 13.844 | M |
| ERS224523 | Daiguene      | 4.777 | 13.844 | M |
| ERS224619 | Daiguene      | 4.777 | 13.844 | M |
| ERS224622 | Daiguene      | 4.777 | 13.844 | M |
| ERS224652 | Daiguene      | 4.777 | 13.844 | M |
| ERS224618 | Zembe-Borongo | 5.747 | 14.442 | F |
| ERS224534 | Zembe-Borongo | 5.747 | 14.442 | F |
| ERS224389 | Zembe-Borongo | 5.747 | 14.442 | F |
| ERS224552 | Zembe-Borongo | 5.747 | 14.442 | F |
| ERS224512 | Zembe-Borongo | 5.747 | 14.442 | F |
| ERS224570 | Zembe-Borongo | 5.747 | 14.442 | F |
| ERS224587 | Zembe-Borongo | 5.747 | 14.442 | F |
| ERS224484 | Zembe-Borongo | 5.747 | 14.442 | F |
| ERS224659 | Zembe-Borongo | 5.747 | 14.442 | F |
| ERS224428 | Zembe-Borongo | 5.747 | 14.442 | F |
| ERS224549 | Zembe-Borongo | 5.747 | 14.442 | F |
| ERS224436 | Zembe-Borongo | 5.747 | 14.442 | F |
| ERS224449 | Gado-Badzere  | 5.747 | 14.442 | F |
| ERS224631 | Gado-Badzere  | 5.747 | 14.442 | F |
| ERS224379 | Gado-Badzere  | 5.747 | 14.442 | F |
| ERS224395 | Gado-Badzere  | 5.747 | 14.442 | F |
| ERS224348 | Gado-Badzere  | 5.747 | 14.442 | F |
| ERS224476 | Gado-Badzere  | 5.747 | 14.442 | F |
| ERS224390 | Gado-Badzere  | 5.747 | 14.442 | F |
| ERS224596 | Gado-Badzere  | 5.747 | 14.442 | F |
| ERS224341 | Gado-Badzere  | 5.747 | 14.442 | F |
| ERS224522 | Mayos         | 4.341 | 13.558 | F |
| ERS224514 | Mayos         | 4.341 | 13.558 | F |
| ERS224641 | Mayos         | 4.341 | 13.558 | F |
| ERS224577 | Mayos         | 4.341 | 13.558 | F |
| ERS224585 | Mayos         | 4.341 | 13.558 | F |
| ERS224644 | Mayos         | 4.341 | 13.558 | F |
| ERS224557 | Mayos         | 4.341 | 13.558 | F |
| ERS224599 | Mayos         | 4.341 | 13.558 | F |
| ERS224544 | Mayos         | 4.341 | 13.558 | F |
| ERS224503 | Mayos         | 4.341 | 13.558 | F |
| ERS224578 | Mayos         | 4.341 | 13.558 | F |
| ERS224666 | Daiguene      | 4.777 | 13.844 | F |
| ERS224843 | Daiguene      | 4.777 | 13.844 | F |
| ERS224598 | Daiguene      | 4.777 | 13.844 | F |

|           |          |       |        |   |
|-----------|----------|-------|--------|---|
| ERS224662 | Daiguene | 4.777 | 13.844 | F |
| ERS224589 | Daiguene | 4.777 | 13.844 | F |
| ERS224627 | Daiguene | 4.777 | 13.844 | F |
| ERS224647 | Daiguene | 4.777 | 13.844 | F |
| ERS224612 | Daiguene | 4.777 | 13.844 | F |
| ERS224621 | Daiguene | 4.777 | 13.844 | F |
| ERS224613 | Daiguene | 4.777 | 13.844 | F |
| ERS224841 | Daiguene | 4.777 | 13.844 | F |
| ERS224632 | Daiguene | 4.777 | 13.844 | F |
| ERS224844 | Daiguene | 4.777 | 13.844 | F |

## **S1.6. mRNA-Sequencing (RNA-Seq) datasets**

### S1.6.1. mRNA sampling

Samples were derived from wild type or transgenic G3 strains of *An. gambiae*. In total our datasets were composed of 22 embryonic, 16 larval and 2 whole adult samples as well as 12 dissected adult samples (**Fig. S3, Table S3**). Developmentally staged embryonic samples were derived from the wild type G3 strain or from eggs from crosses of G3 females to transgenic males, bearing the transgene beta2-tubulin I-*PPoI-11A*, which results in embryonic clutches that are ~95% males (12). L1, L2-L3 and L3-L4 larval instar pools were sexed according to the inheritance of an X-chromosome-linked 3xP3: dsRED transgene in a G3 background. Using the transgenic lines allowed us to extract either sexed (for larvae) or heavily sex-biased (for embryos) mRNA from developmental stages, where the sexes are not morphologically distinguishable. Dissected reproductive tissues, comprising testis and accessory glands for males and 48-hr post-blood meal ovaries for females, along with carcass samples lacking reproductive organs, were obtained from 2-3 day old males and non-virgin females of the wildtype G3 strain. Total mRNA was extracted using Tri-Reagent and DNase treated with TurboDNase (Ambion). All samples were paired-end sequenced at either 100-bp or 85-bp read lengths using Illumina HiSeq2000. In addition to these datasets we also included in some analyses RNA-Seq data from previously published work (9), which included mixed sex wild type embryos, larvae, pupae and male and female adults.

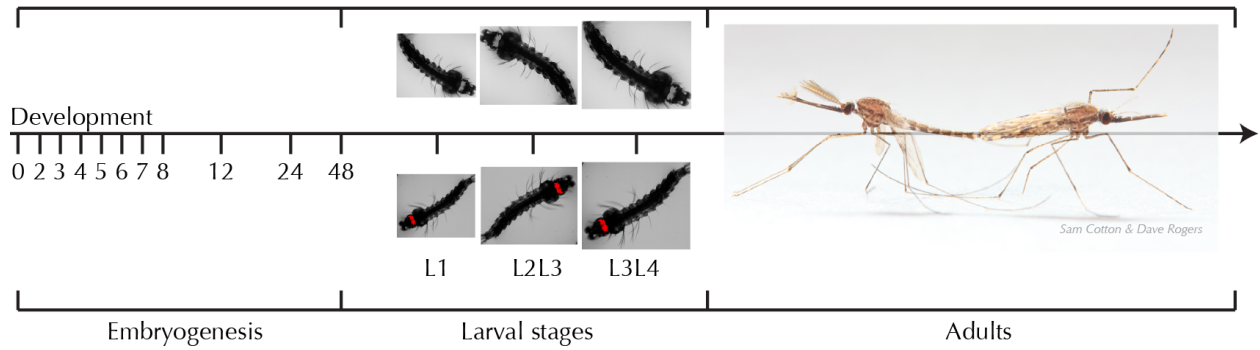

**Figure S3. Developmental stages examined by RNA-Seq.** The numbers below the development bar indicate hours after egg laying, when wild type and *I-PpoI-11A* embryos were collected. The larval instar stages indicated below the fluorescent images illustrate the instars selected and the sexing phenotype. Adults were morphologically distinguishable. Not shown here are the dissected tissues, comprising testes and accessory glands for males and 48-hr post-blood meal ovaries for females, along with corresponding carcass samples lacking reproductive organs.

**Table S3.** RNA-Seq Illumina samples. All RNA-Seq datasets from the table below can be found under the single study accession number SRP045243 in the NCBI SRA archive.

| <b>Dataset</b> | <b>Developmental Stage</b> | <b>Number of reads</b> |
|----------------|----------------------------|------------------------|
| 1              | 0hr embryo I-PPoI-11A      | 46334587               |
| 2              | 0hr embryo wildtype G3     | 47589058               |
| 3              | 2hr embryo I-PPoI-11A      | 57212530               |
| 4              | 2hr embryo wildtype G3     | 50134111               |
| 5              | 3hr embryo I-PPoI-11A      | 58976089               |
| 6              | 3hr embryo wildtype G3     | 47345613               |
| 7              | 4hr embryo I-PPoI-11A      | 36280144               |
| 8              | 4hr embryo wildtype G3     | 41430533               |
| 9              | 5hr embryo I-PPoI-11A      | 50632449               |
| 10             | 5hr embryo wildtype G3     | 50116143               |
| 11             | 6hr embryo I-PPoI-11A      | 46297153               |
| 12             | 6hr embryo wildtype G3     | 54887142               |
| 13             | 7hr embryo I-PPoI-11A      | 45981453               |
| 14             | 7hr embryo wildtype G3     | 56541072               |
| 15             | 8hr embryo I-PPoI-11A      | 51380504               |
| 16             | 8hr embryo wildtype G3     | 53902351               |
| 17             | 12hr embryo I-PPoI-11A     | 54471610               |
| 18             | 12hr embryo wildtype G3    | 59193282               |
| 19             | 24hr embryo I-PPoI-11A     | 42966888               |
| 20             | 24hr embryo wildtype G3    | 47126528               |
| 21             | 48hr embryo I-PPoI-11A     | 51472349               |
| 22             | 48hr embryo wildtype G3    | 34136556               |
| 23             | Adult female G3            | 49870018               |
| 24             | Adult male G3              | 61473980               |
| 25             | L1 female Rep1             | 10057432               |
| 26             | L1 female Rep2             | 9479689                |
| 27             | L1 female Rep3             | 13791423               |
| 28             | L1 male Rep1               | 15140571               |
| 29             | L1 male Rep2               | 19026653               |
| 30             | L1 male Rep3               | 19056929               |
| 31             | L2L3 female Rep1           | 8929475                |
| 32             | L2L3 female Rep2           | 10967528               |
| 33             | L2L3 male Rep1             | 15365114               |
| 34             | L2L3 male Rep2             | 6802972                |
| 35             | L3L4 female Rep1           | 13528366               |
| 36             | L3L4 female Rep2           | 12465919               |
| 37             | L3L4 female Rep3           | 12781905               |
| 38             | L3L4 male Rep1             | 14325465               |
| 39             | L3L4 male Rep2             | 5787855                |
| 40             | L3L4 male Rep3             | 14707969               |
| 41             | female Carcass1            | 4235727                |
| 42             | female Carcass2            | 4998438                |
| 43             | female Carcass3            | 3500175                |
| 44             | Ovaries 48hrs PBM Rep1     | 8180622                |
| 45             | Ovaries 48hrs PBM Rep2     | 4744888                |



|    |                        |         |
|----|------------------------|---------|
| 46 | Ovaries 48hrs PBM Rep3 | 5755372 |
| 47 | male Carcass1          | 6249611 |
| 48 | male Carcass3          | 9995067 |
| 49 | male Carcass2          | 9530566 |
| 50 | Testis and ACG Rep1    | 5262842 |
| 51 | Testis and ACG Rep2    | 8574538 |
| 52 | Testis and ACG Rep3    | 4959052 |

### S1.6.2. mRNA-Seq transcriptome assembly and quantification

Paired reads were processed and aligned (i) against the reference genome of *An. gambiae* (AgamP4) using RNA-STAR (13), or (ii) against transcript sequences using Bowtie2 (14). Allowing only one alignment per read, transcript abundance was quantified using HTSeq (15). Counts were normalized for each sample using an effective library size of concordantly mapping read pairs (16). Biological replicates were collected for larval time points and dissected tissues. We observed good correlations between replicates and also between wild type and I-*PPoI*-11A embryos for similar stages in most cases (**Fig. S4**).

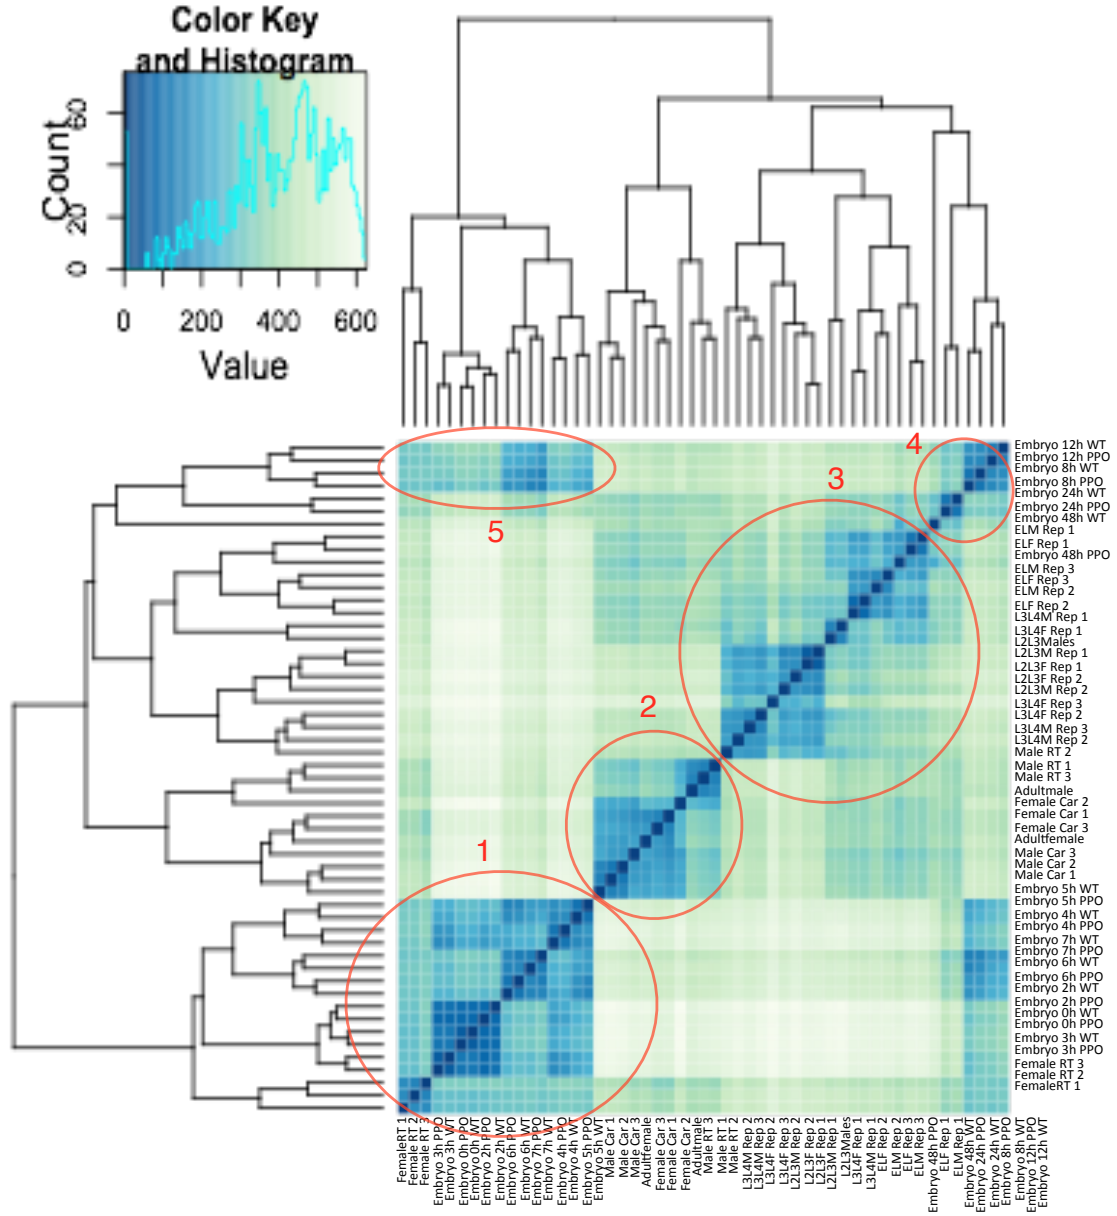

**Figure S4. Correlation analysis between RNA-Seq datasets.** Early embryo and female reproductive samples cluster together at the base of the plot (1), followed by carcass and male reproductive samples (2), larval data (3) and late embryo data (4). Late embryo data also showed a good correlation to early embryo data (5).

## S2. Identification of Y sequences from PacBio WGS

### S2.1. CQ Methods and Benchmarking

We searched for Y chromosome sequences in the error-corrected WGS PacBio reads using the CQ method as outlined in (9). To calculate CQ, we aligned *An. gambiae* Pimperena male and female Illumina sequences (SRA: SRR1509742, SRR1508169) to the PacBio reads using Bowtie single-end allowing no mismatches over the entire length of the read (-v 0) and reporting all alignments (-a). Stringent alignment parameters reduce misclassification of Y-linkage due to repetitive sequence shared between the Y and other chromosomes. The CQ value for each PacBio read was calculated by dividing the number of female alignments by the number of male alignments over the entire length of the PacBio read. To combat variation in coverage of Illumina sequences, we required a minimum of 30 male alignments to the PacBio reads. To classify a PacBio read as Y-linked, we used an upper-bound CQ threshold of 0.2, imposing the requirement of five times more alignments from male than female sequences over the entire PacBio read.

We have previously used sequences of known chromosome origin from *Homo sapiens*, *Drosophila melanogaster* and *An. gambiae* to estimate the false positive rates of the CQ method using parameters of  $CQ < 0.3$  and a minimum of 30 male alignments (9). The false positive rates are 2.44% for *H. sapiens*, 1.85% for *D. melanogaster*, and 0.6% for *An. gambiae*. The more stringent parameters selected in our current study (minimum of 30 male alignments and a CQ threshold of 0.2) should result in even lower rates of false positives.

To estimate the rate of false negatives, we benchmarked the recovery rate of known Y sequences from *H. sapiens*, *D. melanogaster* (9) and *An. gambiae* (17) using

our stringent CQ parameters. As shown in **Table S4**, the recovery rates are 89% for *H. sapiens*, 69% for *D. melanogaster*, and 79% for *An. gambiae*. Thus the CQ method is able to recover a large majority of Y chromosome sequences in all three species.

**Table S4.** CQ recovery rate of known Y sequences in three species

| Species                | Number tested | Number Recovered (CQ<0.2) | % Recovery | False Negative rate |
|------------------------|---------------|---------------------------|------------|---------------------|
| <i>An. gambiae</i>     | 24            | 19                        | 79%        | 21%                 |
| <i>D. melanogaster</i> | 139           | 97                        | 69%        | 31%                 |
| <i>H. sapiens</i>      | 2671          | 2381                      | 89%        | 11%                 |

For CQ calculations, male and female data were from the same sources listed in ref. (9).

The CQ parameters were  $CQ < 0.2$  and male alignments  $> 29$ . Only MSY sequences were used for calculation of human CQs.

## **S2.2. Ydb: an extensive catalog of Y chromosome sequences derived from PacBio sequencing**

From the 4,346,630 error-corrected PacBio reads, we identified 79,475 potentially Y-linked reads with more than 29 alignments in males and a CQ value below 0.2. We retrieved these reads and constructed a database we call Ydb (Other Supporting File 1). Ydb contains 246 Mb of predicted Y chromosome sequences with an N50 size of 3,434 bp. Because Ydb is constructed based on a CQ threshold of 0.2, its content is likely derived from the male-limited portion of the Y chromosome that we refer to as the non-recombining Y (NRY). Sequences derived from a putative pseudoautosomal region (PAR) would not be highly represented within Ydb, as these occur in females in equal numbers. The Ydb was screened for bacterial contamination using Kraken (6) as in S1.2.

Only four PacBio reads (EC-read-Y.92, EC-read-Y.53722, EC-read-Y.31930, and EC-read-Y.51121) were identified as bacterial contamination.

Ydb contains a number of satellite and transposable element sequences as well as a small number of genes (**Table S5**; SI Appendix S7). The CQ values of these key features of the NRY are provided in **Table S6**. For cross-species comparisons, which are described in detail in SI Appendix S5, we used relaxed alignment parameters to calculate the relaxed chromosome quotient (RCQ, **Table S7**) of these features.

**Table S5. GenBank accession numbers of all sequence features found in *An.***

***gambiae* Ydb.**

|                     |               |
|---------------------|---------------|
| AgY477 <sup>1</sup> | KP666114      |
| AgY373 <sup>1</sup> | KP666115      |
| AgY53A              | KP666117      |
| AgY53B              | KP666118      |
| AgY53D              | KP666119      |
| AgY280              | KP985635      |
| <i>zanzibar</i>     | KP878482      |
| <i>pemba</i>        | KP878483      |
| <i>mafia</i>        | KP878484      |
| <i>tumbatu</i>      | KP878485      |
| <i>chumbe</i>       | KP878486      |
| <i>uzi</i>          | KP878487      |
| <i>latham</i>       | KP878488      |
| <i>mtanga</i>       | AF387862      |
| <i>bawe</i>         | KU902417      |
| <i>changuu-LCR</i>  | KU902416      |
| YG1                 | KC840350      |
| YG2                 | KC845524      |
| YG3                 | KC840349      |
| YG4                 | KR653310      |
| YG5                 | KR653309      |
| YG6                 | KU902415      |
| YG7                 | AGAP010291-RA |
| YG8                 | AGAP008501-RA |

<sup>1</sup>Not present in Ydb because it is an X-associated satellite, AgX367 is closely related to AgY373 and AgY477 (**Fig. S6**), and its sequence has been submitted to GenBank under accession KP666116.

All sequence features found in Ydb are described in SI Appendix S2, S3, and S7, and their consensus sequences are provided in Other Supporting File 1. Sequences of candidate Y-linked genes discovered in other *An. gambiae s.l.* species (*An. merus*, YG9-YG13; *An. quadriannulatus*, YG14-YG16) are also provided in Other Supporting File 1 and are described in SI Appendix S7.2.

**Table S6.** CQs of Y repeats and genes across the *An. gambiae* complex

|                 | <i>An. gambiae</i> G3 |        |       | <i>An. gambiae</i> Pimperena |         |       | <i>An. gambiae</i> Asembo |        |       | <i>An. quadriannulatus</i><br>SANGWE |        |       | <i>An. arabiensis</i> Dongola |      |       | <i>An. merus</i> MAF |       |       |
|-----------------|-----------------------|--------|-------|------------------------------|---------|-------|---------------------------|--------|-------|--------------------------------------|--------|-------|-------------------------------|------|-------|----------------------|-------|-------|
|                 | Female                | Male   | CQ    | Female                       | Male    | CQ    | Female                    | Male   | CQ    | Female                               | Male   | CQ    | Female                        | Male | CQ    | Female               | Male  | CQ    |
| <b>AgY477</b>   | 2026                  | 181341 | 0.011 | 3014                         | 770166  | 0.004 | 468                       | 110956 | 0.004 | 0                                    | 136    | 0.735 | 0                             | 0    | N/A   | 0                    | 0     | N/A   |
| <b>AgY373</b>   | 132                   | 104840 | 0.001 | 3                            | 63422   | 0.000 | 40                        | 41572  | 0.001 | 0                                    | 0      | N/A   | 0                             | 0    | N/A   | 0                    | 0     | N/A   |
| <b>AgY53A</b>   | 152                   | 100212 | 0.002 | 34                           | 471405  | 0.000 | 1                         | 740    | 0.001 | 0                                    | 0      | N/A   | 0                             | 0    | N/A   | 0                    | 0     | N/A   |
| <b>AgY53B</b>   | 646                   | 386405 | 0.002 | 24                           | 501201  | 0.000 | 53                        | 57031  | 0.001 | 0                                    | 0      | N/A   | 0                             | 163  | 0.000 | 0                    | 0     | N/A   |
| <b>AgY53D</b>   | 21                    | 4834   | 0.004 | 14                           | 338607  | 0.000 | 0                         | 0      | N/A   | 0                                    | 0      | N/A   | 0                             | 0    | N/A   | 0                    | 0     | N/A   |
| <b>AgY280</b>   | 75                    | 713    | 0.105 | 11                           | 193912  | 0.000 | 19                        | 12     | 1.583 | 0                                    | 0      | N/A   | 0                             | 0    | N/A   | 0                    | 0     | N/A   |
| <b>zanzibar</b> | 6356                  | 994335 | 0.006 | 12332                        | 3238650 | 0.004 | 2460                      | 971679 | 0.003 | 4017                                 | 458603 | 0.009 | 2657                          | 6239 | 0.426 | 1569                 | 1531  | 1.025 |
| <b>mtanga</b>   | 497                   | 69442  | 0.007 | 315                          | 397916  | 0.001 | 587                       | 148841 | 0.004 | 837                                  | 658    | 1.272 | 283                           | 272  | 1.040 | 378                  | 407   | 0.929 |
| <b>pemba</b>    | 261                   | 32537  | 0.008 | 1969                         | 314208  | 0.006 | 483                       | 136727 | 0.004 | 361                                  | 88130  | 0.004 | 1159                          | 1090 | 1.063 | 225                  | 534   | 0.421 |
| <b>mafia</b>    | 17752                 | 116144 | 0.153 | 40323                        | 597866  | 0.067 | 11040                     | 190332 | 0.058 | 7427                                 | 11358  | 0.654 | 6841                          | 5596 | 1.222 | 11409                | 12167 | 0.938 |
| <b>tumbatu</b>  | 378                   | 2301   | 0.164 | 5030                         | 12947   | 0.389 | 1170                      | 5895   | 0.198 | 26                                   | 18     | 1.444 | 424                           | 336  | 1.262 | 0                    | 0     | N/A   |
| <b>chumbe</b>   | 1477                  | 37009  | 0.040 | 3227                         | 148626  | 0.022 | 1177                      | 40633  | 0.029 | 1365                                 | 1388   | 0.983 | 1155                          | 981  | 1.177 | 1176                 | 1251  | 0.940 |
| <b>uzi</b>      | 5250                  | 13532  | 0.388 | 15117                        | 66690   | 0.227 | 3190                      | 21822  | 0.146 | 1327                                 | 1311   | 1.012 | 1589                          | 1194 | 1.331 | 15                   | 14    | 1.071 |
| <b>latham</b>   | 2                     | 688    | 0.003 | 0                            | 2126    | 0.000 | 0                         | 415    | N/A   | 0                                    | 0      | N/A   | 0                             | 0    | N/A   | 0                    | 0     | N/A   |
| <b>bawe</b>     | 912                   | 1057   | 0.863 | 1726                         | 2075    | 0.832 | 317                       | 355    | 0.893 | 88                                   | 113    | 0.779 | 288                           | 194  | 1.485 | 25                   | 16    | 1.562 |
| <b>changuu</b>  | 7329                  | 7639   | 0.959 | 26882                        | 28920   | 0.93  | 9551                      | 10986  | 0.869 | 1492                                 | 1139   | 1.310 | 3841                          | 3471 | 1.107 | 3640                 | 4272  | 0.852 |
| <b>YG1</b>      | 6                     | 1631   | 0.004 | 62                           | 6639    | 0.009 | 6                         | 2425   | 0.002 | 7                                    | 234    | 0.030 | 4                             | 494  | 0.008 | 0                    | 0     | N/A   |
| <b>YG2</b>      | 2                     | 692    | 0.003 | 0                            | 3971    | 0.000 | 0                         | 1508   | N/A   | 0                                    | 292    | 0.000 | 0                             | 567  | 0.000 | 0                    | 0     | N/A   |
| <b>YG3</b>      | 34                    | 340    | 0.100 | 824                          | 871     | 0.946 | 10                        | 8      | 1.25  | 0                                    | 0      | N/A   | 66                            | 48   | 1.375 | 25                   | 30    | 0.833 |
| <b>YG4</b>      | 13                    | 80     | 0.163 | 0                            | 0       | 0.000 | 312                       | 201    | 1.552 | 11                                   | 10     | 1.100 | 61                            | 60   | 1.017 | 0                    | 0     | N/A   |
| <b>YG5</b>      | 12                    | 759    | 0.016 | 46                           | 8493    | 0.005 | 12                        | 95     | 0.126 | 39                                   | 12     | 3.250 | 142                           | 78   | 1.821 | 0                    | 0     | N/A   |
| <b>YG6</b>      | 55                    | 20     | 2.750 | 204                          | 117     | 1.744 | 5                         | 4      | 1.25  | 0                                    | 0      | N/A   | 0                             | 0    | N/A   | 0                    | 0     | N/A   |
| <b>YG7</b>      | 42                    | 40     | 1.050 | 209                          | 145     | 1.441 | 45                        | 57     | 0.789 | 4                                    | 14     | 0.286 | 44                            | 39   | 1.128 | 0                    | 0     | N/A   |
| <b>YG8</b>      | 64                    | 59     | 1.085 | 398                          | 394     | 1.01  | 212                       | 252    | 0.841 | 22                                   | 20     | 1.100 | 207                           | 173  | 1.197 | 42                   | 41    | 1.024 |
| <b>YG9</b>      | 19                    | 16     | 1.188 | 900                          | 842     | 1.069 | 388                       | 466    | 0.833 | 129                                  | 101    | 1.277 | 309                           | 286  | 1.08  | 112                  | 449   | 0.249 |
| <b>YG10</b>     | 162                   | 154    | 1.052 | 1291                         | 1301    | 0.992 | 645                       | 703    | 0.917 | 229                                  | 252    | 0.909 | 417                           | 357  | 1.168 | 372                  | 2589  | 0.144 |



|              |     |     |       |      |     |       |     |     |       |     |     |       |     |     |       |     |      |       |
|--------------|-----|-----|-------|------|-----|-------|-----|-----|-------|-----|-----|-------|-----|-----|-------|-----|------|-------|
| <i>YG12</i>  | 172 | 135 | 1.274 | 544  | 553 | 0.984 | 174 | 232 | 0.75  | 59  | 55  | 1.073 | 124 | 108 | 1.148 | 77  | 511  | 0.151 |
| <i>YG13</i>  | 185 | 109 | 1.697 | 893  | 833 | 1.072 | 376 | 409 | 0.919 | 276 | 337 | 0.819 | 383 | 305 | 1.256 | 481 | 2534 | 0.190 |
| <i>YG14</i>  | 178 | 159 | 1.119 | 222  | 181 | 1.227 | 170 | 183 | 0.929 | 10  | 75  | 0.133 | 27  | 23  | 1.174 | 4   | 5    | 0.800 |
| <i>YG15</i>  | 0   | 0   | N/A   | 0    | 0   | N/A   | 0   | 0   | N/A   | 0   | 540 | 0.000 | 0   | 0   | N/A   | 0   | 0    | N/A   |
| <i>YG16</i>  | 5   | 10  | 0.500 | 0    | 0   | N/A   | 0   | 0   | N/A   | 0   | 135 | 0.000 | 0   | 0   | N/A   | 0   | 0    | N/A   |
| <i>white</i> | 51  | 35  | 1.457 | 1249 | 674 | 1.853 | 543 | 358 | 1.517 | 305 | 131 | 2.328 | 263 | 101 | 2.604 | 229 | 116  | 1.974 |

CQs were calculated with default parameters: Bowtie -v 0 -a, except for the 53-bp satellites with redundancy removed. A longer consensus sequence was used for the 53-bp satellites because our Illumina sequence reads are longer than the satellite consensus. Reads that aligned multiple times to the longer 53-bp consensus sequences were only counted once. AgY477, AgY373, AgY53A, AgY53B, AgY53D, and AgY280 are satellites; *zanzibar*, *mtanga*, *pemba*, *mafia*, *tumbatu*, *chumbe*, *uzi*, *latham*, and *bawe* are TEs from the *zanzibar*-amplified region. *changuu* is a repeat on the Y that is associated with *YG5*. *YG1-YG5* are confirmed Y genes in *An. gambiae*. *YG6-8* are candidate Y genes in *An. gambiae*, *YG9-YG13* are candidate Y genes in *An. merus*, *YG14-YG16* are candidate genes in *An. quadriannulatus*. *White* is a known single-copy X chromosome gene, for reference. See SI Appendix S7 for details.

**Table S7.** Relaxed CQs (RCQ) of Y repeats and genes across the *An. gambiae* complex.

|                  | <i>An. gambiae</i> G3 |         |       | <i>An. gambiae</i> Pimperena |         |       | <i>An. gambiae</i> Asembo |         |       | <i>An. quadriannulatus</i> |         |       | <i>An. arabiensis</i> |        |       | <i>An. merus</i> |         |       |
|------------------|-----------------------|---------|-------|------------------------------|---------|-------|---------------------------|---------|-------|----------------------------|---------|-------|-----------------------|--------|-------|------------------|---------|-------|
|                  | Female                | Male    | RCQ   | Female                       | Male    | RCQ   | Female                    | Male    | RCQ   | Female                     | Male    | RCQ   | Female                | Male   | RCQ   | Female           | Male    | RCQ   |
| <b>AgY477**</b>  | 1052                  | 171989  | 0.006 | 5274                         | 474572  | 0.011 | 2314                      | 356263  | 0.006 | 0                          | 0       | 0.000 | 0                     | 0      | 0.000 | 122053           | 166660  | 0.732 |
| <b>AgY373***</b> | 842                   | 58416   | 0.014 | 295                          | 116551  | 0.003 | 703                       | 96393   | 0.007 | 0                          | 0       | 0.000 | 4952                  | 2477   | 1.999 | 161973           | 217364  | 0.745 |
| <b>AgY53A*</b>   | 633                   | 337614  | 0.002 | 649                          | 958194  | 0.001 | 11965                     | 69798   | 0.171 | 462                        | 20270   | 0.023 | 356                   | 314467 | 0.001 | 1233038          | 1440066 | 0.856 |
| <b>AgY53B*</b>   | 615                   | 431081  | 0.001 | 128                          | 866397  | 0.000 | 1994                      | 278877  | 0.007 | 4                          | 546     | 0.007 | 799                   | 704568 | 0.001 | 366272           | 341628  | 1.072 |
| <b>AgY53D*</b>   | 337                   | 2305    | 0.146 | 30                           | 572980  | 0.000 | 292                       | 203     | 1.438 | 0                          | 0       | 0.000 | 0                     | 0      | 0.000 | 47               | 74      | 0.635 |
| <b>AgY280</b>    | 335325                | 322273  | 1.04  | 270887                       | 1024730 | 0.264 | 87635                     | 217078  | 0.404 | 12                         | 15      | 0.800 | 758879                | 394611 | 1.923 | 1586135          | 2122548 | 0.747 |
| <b>zanzibar</b>  | 63394                 | 1030442 | 0.062 | 209262                       | 3275842 | 0.064 | 67643                     | 1077943 | 0.063 | 135897                     | 2171018 | 0.063 | 84878                 | 101615 | 0.835 | 110001           | 106793  | 1.030 |
| <b>mtanga</b>    | 2345                  | 65195   | 0.036 | 9220                         | 346467  | 0.027 | 2562                      | 129684  | 0.02  | 6293                       | 6258    | 1.006 | 6202                  | 5642   | 1.099 | 5494             | 5618    | 0.978 |
| <b>mafia</b>     | 323215                | 375454  | 0.861 | 1193354                      | 1514771 | 0.788 | 434902                    | 602075  | 0.722 | 402732                     | 410298  | 0.982 | 507381                | 428743 | 1.183 | 400546           | 384117  | 1.043 |
| <b>pemba</b>     | 2745                  | 36161   | 0.076 | 19000                        | 285265  | 0.067 | 5690                      | 120922  | 0.047 | 6611                       | 275828  | 0.024 | 17475                 | 16460  | 1.062 | 6905             | 15287   | 0.452 |
| <b>chumbe</b>    | 3821                  | 34424   | 0.111 | 10140                        | 129520  | 0.078 | 4690                      | 41180   | 0.114 | 6254                       | 6590    | 0.949 | 3450                  | 3065   | 1.126 | 4731             | 5213    | 0.908 |
| <b>uzi</b>       | 32972                 | 38045   | 0.867 | 104611                       | 151411  | 0.691 | 35639                     | 57808   | 0.617 | 48592                      | 48638   | 0.999 | 36617                 | 30869  | 1.186 | 15290            | 14946   | 1.023 |
| <b>tumbatu</b>   | 1305                  | 3284    | 0.397 | 10487                        | 16940   | 0.619 | 2312                      | 7123    | 0.325 | 1085                       | 1135    | 0.956 | 1979                  | 1659   | 1.193 | 1825             | 1876    | 0.973 |
| <b>latham</b>    | 905                   | 4767    | 0.19  | 3930                         | 20670   | 0.19  | 1404                      | 8695    | 0.161 | 835                        | 880     | 0.949 | 1961                  | 1577   | 1.244 | 1412             | 1071    | 1.318 |
| <b>bawe</b>      | 11461                 | 10480   | 1.094 | 41856                        | 39911   | 1.049 | 15340                     | 16141   | 0.95  | 10411                      | 11284   | 0.923 | 13644                 | 12859  | 1.061 | 16189            | 16117   | 1.004 |
| <b>changuu</b>   | 16916                 | 26825   | 0.631 | 48031                        | 117963  | 0.407 | 17861                     | 20955   | 0.852 | 16399                      | 11393   | 1.439 | 15163                 | 12997  | 1.167 | 13902            | 15145   | 0.918 |
| <b>YG1</b>       | 9562                  | 14100   | 0.678 | 21827                        | 28493   | 0.766 | 9951                      | 14647   | 0.679 | 9556                       | 14515   | 0.658 | 9620                  | 11574  | 0.831 | 11924            | 10692   | 1.115 |
| <b>YG2</b>       | 2555                  | 3322    | 0.769 | 12185                        | 16423   | 0.742 | 4080                      | 6830    | 0.597 | 5325                       | 8635    | 0.617 | 4592                  | 6659   | 0.690 | 3900             | 5120    | 0.762 |
| <b>YG3</b>       | 586                   | 859     | 0.682 | 2309                         | 2510    | 0.92  | 434                       | 610     | 0.711 | 736                        | 869     | 0.847 | 448                   | 447    | 1.002 | 367              | 361     | 1.017 |
| <b>YG4</b>       | 996                   | 1117    | 0.892 | 2331                         | 2439    | 0.956 | 1851                      | 2140    | 0.865 | 870                        | 782     | 1.113 | 926                   | 961    | 0.964 | 460              | 505     | 0.911 |
| <b>YG5</b>       | 83                    | 1166    | 0.071 | 641                          | 14686   | 0.044 | 205                       | 410     | 0.500 | 1997                       | 1133    | 1.763 | 1206                  | 694    | 1.738 | 162              | 180     | 0.900 |
| <b>YG6</b>       | 528                   | 202     | 2.614 | 3317                         | 1756    | 1.889 | 1048                      | 650     | 1.612 | 940                        | 501     | 1.876 | 942                   | 474    | 1.987 | 208              | 113     | 1.841 |
| <b>gYG7</b>      | 513                   | 494     | 1.038 | 11332                        | 11390   | 0.995 | 2437                      | 2409    | 1.012 | 3145                       | 2895    | 1.086 | 1906                  | 1769   | 1.077 | 1511             | 1357    | 1.113 |
| <b>YG8</b>       | 219                   | 166     | 1.319 | 1242                         | 1359    | 0.914 | 530                       | 566     | 0.936 | 581                        | 565     | 1.028 | 652                   | 552    | 1.181 | 396              | 394     | 1.005 |
| <b>YG9</b>       | 70                    | 69      | 1.014 | 1575                         | 1512    | 1.042 | 624                       | 759     | 0.822 | 755                        | 721     | 1.047 | 787                   | 749    | 1.051 | 1023             | 9416    | 0.109 |
| <b>YG10</b>      | 330                   | 303     | 1.089 | 2295                         | 2371    | 0.968 | 917                       | 985     | 0.931 | 1409                       | 1347    | 1.046 | 1157                  | 1037   | 1.116 | 1649             | 12736   | 0.129 |
| <b>YG11</b>      | 137                   | 124     | 1.105 | 706                          | 753     | 0.938 | 274                       | 325     | 0.843 | 358                        | 405     | 0.884 | 338                   | 316    | 1.070 | 493              | 2648    | 0.186 |
| <b>YG12</b>      | 289                   | 231     | 1.251 | 962                          | 971     | 0.991 | 348                       | 448     | 0.777 | 519                        | 523     | 0.992 | 435                   | 411    | 1.058 | 627              | 4178    | 0.150 |
| <b>YG13</b>      | 474                   | 313     | 1.514 | 2209                         | 2138    | 1.033 | 870                       | 968     | 0.899 | 1099                       | 1131    | 0.972 | 1106                  | 996    | 1.110 | 1281             | 8166    | 0.157 |

|              |      |     |       |      |      |       |      |      |       |     |      |       |      |     |       |     |     |       |
|--------------|------|-----|-------|------|------|-------|------|------|-------|-----|------|-------|------|-----|-------|-----|-----|-------|
| <i>YG14</i>  | 1158 | 897 | 1.291 | 1622 | 2021 | 0.803 | 1622 | 1650 | 0.983 | 420 | 2445 | 0.172 | 1209 | 935 | 1.293 | 764 | 882 | 0.866 |
| <i>YG15</i>  | 748  | 684 | 1.094 | 1166 | 1030 | 1.132 | 1637 | 1806 | 0.906 | 536 | 1469 | 0.365 | 402  | 427 | 0.941 | 288 | 324 | 0.889 |
| <i>YG16</i>  | 335  | 309 | 1.084 | 677  | 498  | 1.359 | 848  | 983  | 0.863 | 171 | 573  | 0.298 | 173  | 183 | 0.945 | 154 | 166 | 0.928 |
| <i>white</i> | 120  | 70  | 1.714 | 1827 | 937  | 1.95  | 688  | 465  | 1.48  | 861 | 424  | 2.031 | 936  | 436 | 2.147 | 587 | 291 | 2.017 |

If not marked, CQs were calculated with BWA-MEM (18) using male and female Illumina sequences. Satellite sequences AgY477, AgY373, and AgX367 are closely related or even identical over much of their length (see fig. S6). To avoid cross-alignments between AgY477 and AgX367 in the AgY477 analysis, we used a reference sequence that distinguishes the Y-biased from the X-biased satellites (orange shading in fig. S6). However, note that this 90 bp sequence (an insertion from 30-120 bp not found in AgX367, but present in both AgY477 and AgY373) is similar enough to align between the Y-biased satellites. Thus, values for AgY477 in this table reflect the combined AgY373 and AgY477 alignment results. For the AgY373 analysis, the last 85 bp of this satellite monomer were used as a reference for read mapping, as they are unique (fig. S6A, red shading). Due to the short length of the reference sequences for AgY477 and AgY373, BLASTN with default parameters was used to calculate the number of alignments. Reads that aligned more than once were removed. AgY53A and AgY53B were so short, that we found it best to use BLASTN with word\_size 7 to calculate the number of alignments. Reads that aligned more than once were removed. AgY477, AgY373, AgY53A, AgY53B, AgY53D, and AgY280 are satellites; *zanzibar*, *mtanga*, *pemba*, *mafia*, *tumbatu*, *chumbe*, *uzi*, *latham*, and *bawe* are sequences from the *zanzibar* amplified region; *changuu* is a repeat on the Y that is associated with *YG5*; *YG1-YG5* are confirmed Y genes in *An. gambiae*. *YG6-8* are candidate Y genes in *An. gambiae*, *YG9-YG13* are candidate Y genes in *An. merus*, *YG14-YG16* are candidate genes in *An. quadriannulatus*. *White* is a known single-copy X chromosome gene, for reference. See SI Appendix S7 for details.

### **S2.3. Comparison of the CQ method to the Y chromosome Genome Scan (YGS) method**

The YGS method is an alternate method to identify Y sequences that was designed to compare reference genome assemblies, typically constructed from mixed sexes, to Illumina sequences determined from females (19). It is a kmer-based method that identifies Y-linked sequences (typically scaffolds in an assembly) based on the absence of kmers shared with females, and more specifically, the absence of female kmers that are not repetitive in the female genome. For unambiguous classification of a sequence as Y-linked, YGS requires that the sequence has a large fraction (e.g., >70%) of kmers unmatched in the female Illumina data, under the assumption that Y chromosome sequences are both limited to males and distinctive in sequence from the other chromosomes. We tested the YGS methods using previously known *An. gambiae* Y chromosome sequences (“Y-unplaced” contigs and 3 genes) together with the major repeat features of the Y chromosome (SI Appendix S3; **Table S5**) validated as Y-linked in *An. gambiae* by male-specific PCR and physical mapping (SI Appendix S4). Using a female-derived Illumina assembly of *An. gambiae* to filter out repetitive kmers, we calculated the percent of non-repetitive kmers in these known-Y control sequences that were unmatched in female Illumina data (**Table S8**). None of the 24 Y-unplaced contigs have more than 40% unmatched kmers. This proportion of unmatched kmers is significantly lower than proportions (>70%) that effectively separated Y sequences from X and autosomal sequences in humans and flies (19). Even two known Y genes, *YGI* and *YG2* (9), only had unmatched kmer percentages of 43% and 57%, respectively. Furthermore, none of the major repeat features of the Y identified in Ydb (SI Appendix S3) had unmatched kmer percentages greater than 19%. AgY53A and AgY53B had zero unmatched kmers. While none of these sequences could be identified as Y-linked using the YGS method, all but a few short sequences were identified as Y-linked using the CQ method.

The difference between *D. melanogaster* and *An. gambiae* that causes the YGS method to fail is most likely due to extensive similarity between sequences on the *An. gambiae* Y and sequences elsewhere in the genome. For example, there are other closely-related copies of *zanzibar* and other Y-enriched repeats (SI Appendix S3; **Fig. S11**), scattered throughout other chromosomes. Similarly, satellite sequences AgY477, AgY373, AgY53A, and AgY53B (SI Appendix S3; **Table S12**; **Fig. S11**) are all present on both the X and Y, even though they are far more abundant on the Y chromosome. Therefore, kmers in these sequences match kmers from female Illumina data. The CQ method, which compares the relative abundance of sequences between male and female data, is more effective at identifying Y chromosome sequences in *An. gambiae*.

**Table S8.** Comparison of YGS and CQ for known Y chromosome sequences

| Sequence ID     | total k-mers | non-repetitive k-mers | unmatched kmers | % unmatched | Female Alignments | Male Alignments | CQ    |
|-----------------|--------------|-----------------------|-----------------|-------------|-------------------|-----------------|-------|
| Y_unplaced.1    | 2580         | 1416                  | 280             | 20          | 691               | 3144            | 0.220 |
| Y_unplaced.2    | 4209         | 2163                  | 780             | 36          | 5103              | 17615           | 0.290 |
| Y_unplaced.3    | 35250        | 19379                 | 7713            | 40          | 5527              | 150334          | 0.037 |
| Y_unplaced.4    | 1213         | 1017                  | 100             | 10          | 13                | 177473          | 0.000 |
| Y_unplaced.5    | 3176         | 1813                  | 461             | 25          | 744               | 3958            | 0.188 |
| Y_unplaced.6    | 4563         | 2786                  | 83              | 3           | 21674             | 1743083         | 0.012 |
| Y_unplaced.7    | 2039         | 1562                  | 458             | 29          | 1051              | 595540          | 0.002 |
| Y_unplaced.8    | 1221         | 880                   | 121             | 14          | 35                | 384665          | 0.000 |
| Y_unplaced.9    | 2298         | 1638                  | 1               | 0           | 3506              | 6927            | 0.506 |
| Y_unplaced.10   | 3673         | 2820                  | 327             | 12          | 162               | 2136161         | 0.000 |
| Y_unplaced.11   | 2556         | 1396                  | 47              | 3           | 764               | 19679           | 0.039 |
| Y_unplaced.12   | 2486         | 1895                  | 252             | 13          | 44                | 402651          | 0.000 |
| Y_unplaced.13   | 1435         | 1044                  | 147             | 14          | 17                | 137871          | 0.000 |
| Y_unplaced.14   | 1394         | 1015                  | 47              | 5           | 45                | 448882          | 0.000 |
| Y_unplaced.15   | 1350         | 956                   | 164             | 17          | 24                | 266163          | 0.000 |
| Y_unplaced.16   | 1337         | 1138                  | 52              | 5           | 45                | 719855          | 0.000 |
| Y_unplaced.17   | 1316         | 650                   | 28              | 4           | 692               | 2052            | 0.337 |
| Y_unplaced.18   | 1296         | 1078                  | 86              | 8           | 24411             | 2506597         | 0.010 |
| Y_unplaced.19   | 1262         | 952                   | 133             | 14          | 1002              | 98047           | 0.010 |
| Y_unplaced.20   | 1241         | 1013                  | 5               | 0           | 22453             | 3156554         | 0.007 |
| Y_unplaced.21   | 1218         | 1026                  | 60              | 6           | 20                | 330155          | 0.000 |
| Y_unplaced.22   | 1123         | 935                   | 59              | 6           | 2                 | 14714           | 0.000 |
| Y_unplaced.23   | 1102         | 933                   | 46              | 5           | 13                | 360738          | 0.000 |
| Y_unplaced.24   | 1000         | 729                   | 82              | 11          | 12                | 127402          | 0.000 |
| YG1             | 3768         | 2613                  | 1127            | 43          | 62                | 6639            | 0.009 |
| YG2             | 2321         | 1547                  | 885             | 57          | 0                 | 3971            | 0.000 |
| YG3             | 850          | 498                   | 0               | 0           | 824               | 871             | 0.946 |
| AgY477          | 266          | 220                   | 9               | 4           | 13146             | 767543          | 0.017 |
| AgY373          | 359          | 249                   | 6               | 2           | 5267              | 967787          | 0.005 |
| <i>zanzibar</i> | 6745         | 3867                  | 418             | 11          | 12231             | 3229726         | 0.004 |

|               |      |      |     |    |     |         |       |
|---------------|------|------|-----|----|-----|---------|-------|
| <i>mtanga</i> | 4070 | 2513 | 487 | 19 | 315 | 397916  | 0.001 |
| AgY53D        | 536  | 398  | 13  | 3  | 44  | 1592076 | 0.000 |
| AgY53B        | 1106 | 982  | 0   | 0  | 77  | 1561798 | 0.000 |
| AgY53A        | 258  | 201  | 0   | 0  | 34  | 471405  | 0.000 |

## **S2.4. Spatial Mapping**

We developed a spatial mapping method to visualize the difference between male and female alignments across all bases in a reference sequence, as compared to CQ which gives an average value over the entire sequence. Illumina WGS sequences from males and females of the colonies and species included in our study were aligned to all Y loci using Bowtie2 (14) using default parameters with the exception of reporting all alignments (-a). We then used bedtools v.2.17.0 genomeCoverageBed (20) to report the number of reads aligned from each sample for every basepair of the Y locus (-d option). Read counts were then normalized by the sample library size to correctly compare male and female samples of each species. The difference between male and female counts was then calculated and female counts were then brought to negative scale. Read counts for male, female and their relative difference were then plotted for every basepair for each Y locus and for each species. Examples of spatial mapping are described in SI Appendix S3 and S7.

### **S3. The *An. gambiae* Y chromosome contains massively amplified satellites and retrotransposons.**

To characterize the major satellite and transposable element (TE) content of the *An. gambiae* Y chromosome (see **Table S5**), we ran RepeatMasker (21) with the default settings against Ydb, using the *An. gambiae* PEST repeat library supplemented with previously identified Y satellites [AgY477, AgY373, AgY53A, and AgY53B; (22)] and TEs [mtanga; (23)]. In total, 98% of Ydb was masked (**Table S9**). Based on the resulting RepeatMasker output we calculated the number of base pairs masked by each repeat in the repeat library for both known and unknown repeat types through iterative clustering and consensus generation. The consensus sequences for satellites AgY477/AgY373, AgY53A and AgY53B were responsible for masking large portions of Ydb. Using the BACs we were able to identify full-length copies matching consensus sequences of many other non-satellite repeats, including *zanzibar*, *pemba*, *mafia*, *chumbe*, *tumbatu*, and *latham*. As a complementary approach, we aligned the male and female Illumina sequences to the PacBio reads using BWA-MEM (18), calculated RCQs, and selected reads with  $CQ < 0.2$ . Then we identified the reads with the largest absolute number of alignments. These contained satellites AgY477/AgY373 and amplified TE sequences dominated by *zanzibar* (SI Appendix S3.2), in agreement with the results from repeat-masking (**Table S9**).



**Table S9.** The proportion of Ydb bases masked by major repetitive features of the *An. gambiae* Y chromosome

| <b>Repetitive Sequence</b> | <b>Length (bp)</b> | <b>Percent of Ydb</b> | <b>Masked bp</b> |
|----------------------------|--------------------|-----------------------|------------------|
| <b>Satellites</b>          |                    |                       |                  |
| AgY477/AgY373              | 477/373            | 0.437                 | 107472713        |
| AgY53A                     | 53                 | 0.017                 | 3984678          |
| AgY53B                     | 53                 | 0.020                 | 5009893          |
| AgY53D                     | 53                 | 0.004                 | 996214           |
| AgY280                     | 280                | 0.010                 | 2454154          |
| <b>Amplified Region</b>    |                    |                       |                  |
| <i>zanzibar</i>            | 6952               | 0.2676                | 65861564         |
| <i>mtanga</i>              | 4084               | 0.0443                | 10909386         |
| <i>pemba</i>               | 4054               | 0.0359                | 8847701          |
| <i>mafia</i>               | 10689              | 0.0627                | 15424206         |
| <i>chumbe</i>              | 4442               | 0.0171                | 4219616          |
| <i>uzi</i>                 | 1929               | 0.0060                | 1484017          |
| <i>tumbatu</i>             | 1832               | 0.0011                | 266058           |
| <i>latham</i>              | 203                | 0.0007                | 182957           |
| <b>Other Repeats</b>       |                    |                       |                  |
| <i>changuu</i>             | 4838               | 0.0134                | 3297609          |
| simple repeats             |                    | 0.0083                | 2034466          |
| uncategorized repeats      |                    | 0.0335                | 8257520          |

### **S3.1. The satellite amplified region (SAR)**

#### **S3.1.1. AgY477 and AgY373**

AgY477 and AgY373 are closely related, and share 100% identity over part of their length (**Figs. S5-S6**). Therefore, to avoid double-counting the amount of Ydb masked by these sequences, we first masked Ydb with AgY477 and then masked the resulting RepeatMasker output with AgY373. We then combined the percent of Ydb masked by both satellites. Together, AgY477 and AgY373 mask 43.7% of the sequences in Ydb (**Table S9**), and by extension, a large portion of the *An. gambiae* NRY chromosome.

AgY477 and AgY373 also bear sequence similarity to another satellite, AgX367, located on the X chromosome (**Fig. S6**). AgX367 does not share with AgY477 or AgY373 any regions of 100% identity longer than the 100 bp reads used in this study. Therefore, reads from AgX367 will not interfere with CQ calculation because we require 100% identity over the entire length of the read. Using the CQ method, we found that AgY477 and AgY373 are ~100x to ~1000x more abundant in males than in females indicating that they are highly enriched on the Y (tables S6-S7).

Using the error-corrected PacBio reads, we were able to determine how the AgY477 and AgY373 satellites are arranged on the Y chromosome. In Ydb, we identified 33,681 reads containing either AgY477 or AgY373 using BLASTN. We retrieved many of these reads and examined the arrangement of the two satellites, using BLASTN. We found that AgY477 and AgY373 occur in tandem arrays consisting of one or the other satellite monomer (Fig. 2A). Using RepeatMasker, we masked all 33,681 PacBio reads with AgY477 and AgY373 sequences as the repeat library, and found that 95.8% of the total sequence was masked. Many of the bases that remain unmasked are within AgY477 and AgY373 and therefore appear to be from sequence

variation of the satellites or poorly error-corrected regions, rather than from other types of sequences.

Frequently, one or more AgY477 or AgY373 monomer was present in a tandem array dominated by the other satellite. The canonical 477 and 373 monomers differ in their first 30 base pairs, and although they are very similar downstream, they can be distinguished by slight sequence variation. Upon close inspection of the mixed arrays, we found evidence of chimeric monomers, consistent with recombination events. Examples involving AgY477 and AgY373 were found, in which one satellite monomer is present at very low frequency in a tandem array dominated by the other. In such arrays, the rare monomer contains the first 30 base pairs of the dominant satellite, and the adjacent monomer of the dominant satellite carries the first 30 base pairs of the rare satellite monomer (Fig. 2A; **Fig. S5**).

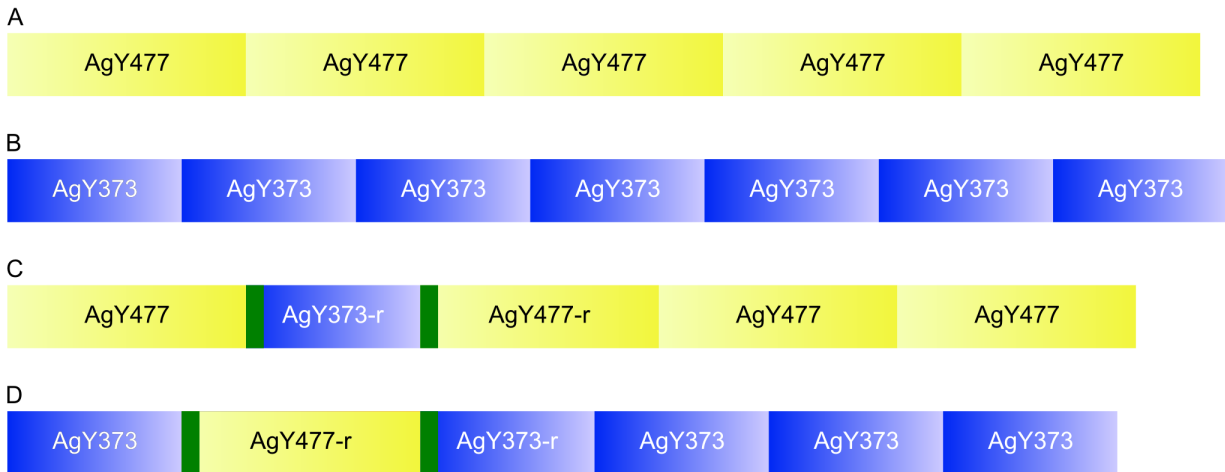

**Figure S5. Schematic illustration of the structure of AgY477 and AgY373 satellite arrays.** (A) The tandem repeat structure of AgY477. (B) The tandem repeat structure of AgY373. (C) Recombination between AgY477 and AgY373 illustrated by a recombinant AgY373 monomer (AgY373-r) with the first 30 bp of AgY477 in an AgY477-dominated array, and the adjacent recombinant AgY477 monomer (AgY477-r) with the first 30 bp of AgY373. (D) Recombination between AgY477 and AgY373 illustrated by a recombinant AgY477 monomer with the first 30 bp of AgY373 in an AgY373-dominated array, and the adjacent recombinant AgY373 monomer with the first 30 bp of AgY477.

## A

```

Y477 TTTGAGCATGTGTTTAAAGGGTAAATATGACCCATAAAGGTTAAGCTCAGAGCTTAGGAAC
Y373 AGGAAATTAATAAATTGCGAAGCAAAGTTTATCCATAAAGGTTAAGCTCAGAGCAAAGGAAC
X367 TTTGAGCATGTGTTTAAAGGGTAT-----

Y477 ATATAGTAAATTGCCTCTAAAGTTGAAGGTTTTGTGGAAAGTCTTCAAATGTGCTTCGGG
Y373 ATATAGTAAATTGCCTCTAAAGTTGAAGGTTTTGTGGAAAGTCTTCAAATGTGCTTCGGG
X367 -----

Y477 GGACTATGACCCAGTATGAAACTTTTTTCATCGCCAAGATCCTTGTTATTGTGTCCCAGGG
Y373 GGACTATGACCCAGTATGAAACTTTTTTCATCACCAAGATCCTTGTTATTGTGTCCCAGGG
X367 -----TATGAAACTTTTTTCATCGCCAAGATCCTTGTTATTGTGTCCCAGGG
          *****

Y477 CTTTGATTTGCTTATTCATGAAGCCCCAATGACAAAAGAACGATAATGAATGACCTTGCA
Y373 CTTTGATTTGCTTATTCATGAAGCCCCAATGGCATAAGAACGATATTGAATGACCTTGCA
X367 CTTTGGTTTGCTTATTCATGAAGGCCCAATGACATAAAAACGATAATGGATGACCTTGCA
          *****

Y477 TTTTCGTCAAACATTCAAGCATGGCCATGGGGACGGATGAGAAAGCTCAAGTGATGTAGT
Y373 TTTTCGTCAAACATTCAAGCATGGCCATGGGGACGGGTGAGAAAGCTGTTTTCAAGAAA
X367 TTTTCGTCAAATTTCAACCATAGGGACGGGTGAAAAGCTCAAGTGATGTAGT
          *****

Y477 TGGATGTTCC--CTTCAAATGGCCATAACTTCGTAACCATGTGTCCTAGCGTGATGATTGA
Y373 AACACCTCTAACTTTAAACGGCCATAACTTTTGAAGTGAAGAGCTAGAGACATAATCTC
X367 TGGATGTTCC--CTTCAAATGGCCATAACTTCGTAGCCATGTGTCCTTGCGTGATGATTAA

Y477 GACAGTTTTGGGAAGGTATTGAAGTGGTCTACAAGATCTGCGCATAGGTTTAAAGATCAG
Y373 TTCACCGTTGGAA-----
X367 GACAGTTTTGGAAAGGTATTGAAGTGGTCTACAAGATCTGTACAAAGGTTAAAGATCAA

Y477 AATCACTGGTAGCCTAGTAAATGGCCTCTGAATGCATTGTACTCGGGAAAACCTGTCAA
Y373 -----
X367 ATTCATTTTTAGTCTAGTAAATCGCCTCTGAATGCATTGTACTCGGGAAAACCTGTCAA

```

## B

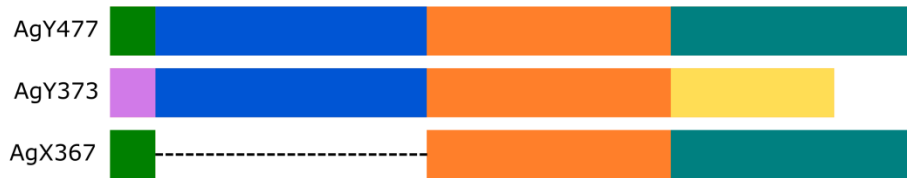

**Figure S6. Relationship of AgY477, AgY373, and AgX367.** (A) Alignment of AgY477, AgY373, and AgX367, indicating a region that distinguishes the Y-biased satellites (AgY477/AgY373) from AgX367 (orange shading) and the region that distinguishes the two Y-biased satellites (AgY477 and AgY373; red shading). (B) Schematized sequence relationships. The same color indicates similar sequences, while different colors indicate different sequences.

### S3.1.2. AgY53A and AgY53B

Two satellites with 53 bp period sizes, AgY53A and AgY53B, mask 1.6 and 2.0 percent of Ydb respectively (**Table S9**). These two satellites appear to occur in long, uninterrupted, tandem arrays. Using BLASTN with an e-value of 1e-100 we identified 2,654 error-corrected PacBio reads containing tandem arrays of AgY53A. With the same parameters we identified 6,702 PacBio reads containing tandem arrays of AgY53B. We identified 34 error-corrected PacBio reads that contained a junction between AgY53A and AgY53B satellite arrays. Therefore, these satellite arrays may occupy neighboring regions of the Y chromosome. AgY53A and AgY53B are some of the most male-biased sequences on the Y. They are ~10,000-20,000 times more abundant in males than in females.

### S.3.1.3. AgY53D and AgY280

We noticed that two unannotated satellites were responsible for variation in copy number between individual *An. gambiae* (SI Appendix S5). These satellites have a 53 bp consensus and a 280 bp consensus, respectively, and were named AgY53D and AgY280. AgY280 and AgY53D occur interspersed in the same arrays (Fig. 2C and **Fig. S7**). AgY280 has regions of similarity to AgY373 (**Fig. S8**). Detailed description is provided in SI Appendix S5.

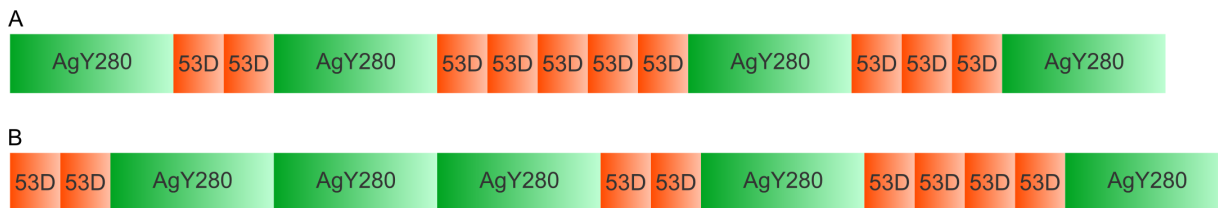

**Figure S7. Structure of AgY53D and AgY280 arrays.** Two examples illustrating a complex interdigitating relationship of AgY53D and AgY280, likely driven by sequence similarity.

```

AgY373  159  TTCCAACGGTGCAAAAATTATGTCTCTAGCTCTTCTGGTTCCAAAGTTATGGCCGTTTAA
          ||| | | | | | | | | | | | | | | | | | | | | | | | | | | | | | | | |
AgY280  373  TTCCAACGGTGAAGAGATTATGTCTCTAGCTCTTCTAGTTCCAAAGTTATGGCCGTTTAA

AgY373  219  AGTTAGATGAttttttttCTTCAAAACTGCTTT
          ||| | | | | | | | | | | | | | | | | | | | | | | | | | | |
AgY280  313  AGTTAGAGGTGTTTTTTCTTGAAAACAGCTTT

```

**Figure S8. Alignment between AgY280 and AgY373, illustrating their sequence similarity.**  
AgY373 is in plus orientation and AgY280 is in minus orientation.

## S3.2. The *zanzibar* amplified region (ZAR)

### S3.2.1. *zanzibar*

We identified a Ty3/Gypsy LTR retrotransposon, *zanzibar*, that represents 26.76% of the base pairs of Ydb using RepeatMasker. The *zanzibar* LTR retrotransposon had not been previously identified as a large component of the Y. We identified many tandem repeats of *zanzibar* in the BACs and error-corrected PacBio reads (Fig. 2A,B). We analyzed these tandem repeats and generated a 6,952 bp *zanzibar* consensus sequence. We analyzed the composition of this consensus sequence using Repbase. In the tandem repeats present on the Y, LTRs do not flank both ends of *zanzibar*. An LTR is only found on the 3' side of the consensus followed directly by the beginning of the next *zanzibar* tandem repeat. In the UNKN chromosome of the PEST assembly, a copy of *zanzibar* was found with LTRs flanking both sides surrounded by non-*zanzibar* sequences. Due to the presence of only one LTR in the *zanzibar* tandem array, we presume that these arrays were not produced by transposition but instead by another mechanism.

To further explore the architecture of the *zanzibar* tandem repeats, we examined all the error-corrected PacBio reads that contained both the beginning and end of the *zanzibar* consensus. We split *zanzibar* into three pieces—which we call beginning, middle, and end—and performed BLASTN against all the error-corrected PacBio reads with parameters: evaluate 1e-100 and max\_target\_seq 10000000. Using these BLASTN results we determined which of the PacBio reads contain either the beginning or end of *zanzibar* more than one time (e.g. reads with a *zanzibar/zanzibar* junction). We recovered 4,615 PacBio reads meeting these criteria. When one copy of *zanzibar* ended another invariably started leading us to conclude that *zanzibar* is organized in large tandem arrays we call the *zanzibar* “amplified” region of the *An. gambiae* Y. The *zanzibar* element is associated with a variety of other TEs on the Y chromosome (see



below). Because of this striking association, we have designated these other TEs with the names given to other islands in the Zanzibar archipelago off the coast of East Africa.

### S3.2.2. Insertions into *zanzibar* are amplified as part of the ZAR

We noticed that the tandem arrays of *zanzibar* were not composed entirely of *zanzibar*; other sequences are inserted into *zanzibar* copies within the arrays. To systematically identify sequences inserted into the *zanzibar* tandem arrays, we performed BLASTN with the *zanzibar* consensus sequence as the query against Ydb and retrieved all matching reads. Next, we ran RepeatMasker on all these reads using the *zanzibar* consensus sequence as the repeat library. Therefore, the remaining sequence should be sequences associated with *zanzibar*. To identify highly abundant insertions into *zanzibar*, we used cd-hit-est (24) to cluster the sequences. Sequences in the most abundant clusters were subjected to further examination.

#### S3.2.2.1. *mtanga*

One notable insertion into *zanzibar* is *mtanga*, a previously-identified Y chromosome transposable element (23). *mtanga* is a 4,284 bp long Ty1-copia element with 119 bp LTRs. *mtanga* masks 4.4% of the sequences in Ydb with RepeatMasker (**Table S9**). We noticed that *zanzibar* and *mtanga* co-occurred often in Ydb, so we performed analysis to determine whether *mtanga* inserted into the same site in *zanzibar*. We identified an insertion site of *mtanga* into *zanzibar* and retrieved the flanking sequences on both sides. We used these sequences to perform BLASTN against the error-corrected PacBio reads with evaluate 1e-50. In the resulting output, 3,875 error-corrected PacBio reads aligned to *mtanga*. Of these, 2,565 PacBio reads aligned to both *mtanga* and one of the insertion flanking sequences. The remaining 1,310 sequences were

almost exclusively less than the length of *mtanga*. Therefore, when present in Ydb, *mtanga* appears to be associated with the same *zanzibar* insertion site.

To be more specific about the exact insertion site, we chose a reference *zanzibar* sequence with an *mtanga* insertion. Noting the *zanzibar* position where the insertion occurred, we measured the distance from this reference position to the start (5') or end (3') of *mtanga* across the set of reads carrying both elements. If the insertion site of *mtanga* into *zanzibar* is the same or nearly the same as the reference in other copies of *zanzibar*, the measured distances should be both small and consistent. The overwhelming majority of distances to the insertion start (96.2%; 1,221/1268) were within 1-6 bases of the reference. Indeed, the 6-bp distance is the result of a 5 bp insertion/deletion, rather than a different insertion site. Similarly, 98.3% (1,268/1,289) of the distances to the insertion end (3' *zanzibar*-*mtanga* junction) were 2 bp. We conclude that almost every insertion of *mtanga* into *zanzibar* occupies the exact same site.

#### S3.2.2.2. *pemba*

Another abundant insertion into *zanzibar* is a 4,054 bp BEL LTR retrotransposon that we have called *pemba*. It is flanked by 200 bp LTRs and has an ORF from 392-3091 bp. We used BLASTN to retrieve 494 PacBio reads from Ydb that contain both the *pemba* consensus and *zanzibar*. We assessed whether the *pemba* insertion site is consistent between different *zanzibar* copies, using the approach described in SI Appendix S3.2. In 243 of 256 (95%) cases we examined, the *pemba* consensus had the exact same insertion site into *zanzibar*. To confirm Y linkage of *pemba*, we performed PCR on genomic DNA of males and females of the Kisumu and G3 strain.

#### S3.2.2.3. mafia

Another abundant insertion into *zanzibar* is an LTR retroelement we have named *mafia*. The *mafia* consensus sequence, verified as Y-linked by PCR, is 10,698 bp with 408 bp LTRs on both sides. It contains an ORF with similarity to a BEL LTR retrotransposon from 457-6,336 bp. However, as a whole *mafia* appears to be a composite of different elements. The sequences between 6,500 and 10,000 match several MITEs and other repetitive sequences. Nevertheless, the *mafia* composite is characteristic of Ydb and it, too, is associated with *zanzibar*. We identified 230 reads containing *mafia* and *zanzibar* sequences, and detailed analysis revealed that like the other elements, *mafia* also appears to be inserted within a consistent site in *zanzibar*. In 159 of 194 (82%) cases examined, *mafia* insertion sites were identical.

#### S3.2.2.4. Other insertions into zanzibar

Several other less abundant insertions into *zanzibar* were also identified in our systematic analysis. These repeats include: a 4,442 bp GYPSY LTR retrotransposon with 113 bp LTRs that we named *chumba*, a 1,832 bp element of unknown type with 50 bp LTRs that we named *tumbatu*, a 1,929 bp element with similarity to hAT and HARBINGER DNA transposons that we named *uzi*, and a 203 bp element of unknown type without LTRs that we named *latham*.

#### S3.2.3. Mechanism of amplification

It is unlikely that the pattern of tandem *zanzibar* repeats was created by retrotransposition, principally because of the tandem head-to-tail organization of the repeated copies. Further, for each element that has inserted into *zanzibar* (e.g., *mtanga*, *pemba*, and *mafia*), the insertion site is identical from one *zanzibar* copy to the next in the ZAR (Fig. 2A,B). The most parsimonious

explanation for this arrangement is that the insertions pre-dated *zanzibar* amplification, and were co-amplified with *zanzibar* subsequently through a mechanism unrelated to retrotransposition.

In total the repeats in the ZAR represent 43.5% of sequences in Ydb (**Table S9**). Therefore, the ZAR likely represents a dominant structural feature of the *An. gambiae* NRY.

### **S3.3. *changuu***

*changuu* is a repetitive conglomerate element homologous to a region within the segmental duplication (or “Low Copy Repeat”; LCR) that flanks the breakpoints of the 2Rj inversion in the Bamako chromosomal form of *An. gambiae* (25). Each copy of the ~16 kb 2Rj LCR contains two 5.3-kb inverted repeats separated by a 4 kb spacer; *changuu*-homologous sequences occur in the inverted repeats. *changuu* is highly abundant within the genome of *An. gambiae*, and especially abundant on the Y. Interestingly, because sequences homologous to the 2Rj LCR were only found in the unmapped assembly of PEST, the origin of the 2Rj LCR was initially proposed to be either pericentric heterochromatin or the Y chromosome (25). We identified *changuu* initially in more than 500 PacBio Ydb reads, due to its association with two genes that are homologous to a syntenic gene-pair on the X chromosome (AGAP001087 and AGAP013547). These homologs co-occur with *changuu* in the part of the LCR that flanks 2Rj (**Fig. S9**). Both mean CQ and spatial mapping of genomic reads on AGAP001087, AGAP013547, and their multicopy homologs on other chromosomes showed relatively more reads mapping from males, which suggested Y-linkage (**Fig. S9**). Accordingly, we retrieved Ydb reads that had BLASTN hits to AGAP001087. To investigate the genic neighborhood of AGAP001087 homologs on Ydb reads, we used these PacBio reads as queries in BLAST searches of the full gene set of *An.*

*gambiae*. Hits to AGAP013547 were found in 59% of the reads, and hits to YG5 (or AGAP013757, its autosomal homolog) in 11% of the reads, supporting Y-linkage. We confirmed that the homology of *changuu* to the 2Rj LCR extends beyond the coding sequences of genes homologous to AGAP001087 and AGAP013547, by masking the 2Rj LCR with AGAP001087 and AGAP013547 and using the masked sequences in BLAST searches of the set of 1171 PacBio Ydb reads matching AGAP001087 sequence. Of the 1171 reads, 1078 also matched the gene-masked LCRs (93 did not). Thus, there is a strong association of both gene homologs and *changuu* in Ydb reads, and the inclusion of these PacBio reads in Ydb was driven by the presence *changuu*. To test this we masked Ydb with *changuu* and calculated that it accounts for ~1.3% of Ydb bases, suggesting that this conglomerate sequence is highly abundant on the Y chromosome.

We were not able to find any PacBio reads that contained the complete ~16 kb 2Rj LCR. Fragments of the 4-kb spacer that separates the 5.3 kb inverted repeats are present in the PacBio reads, but we were unable to identify any reads that contain the full spacer (**Fig. S9D**). At the 5'-end of the inverted repeat, which contains the AGAP013547 homolog, degradation on the Y has resulted in the loss of the first one-third of this gene, as evident from spatial mapping (**Fig. S9D**). We found the 3'-end of the AGAP013547 homolog (294-411bp) in 536 of 772 Ydb PacBio reads but only 2 of these also contained the 5'-end (1-294bp). By comparison, when looking in the entire PacBio data set, both ends co-occurred much more frequently (in 284 of 615 reads). This suggests that this 5' truncation is typical of the Y-linked copies and not copies found elsewhere in the genome, including 2Rj. RNA-Seq data suggest that AGAP001087, its homologs, and AGAP013547 are not abundantly expressed; we were unable to find any male specific 20-mers.

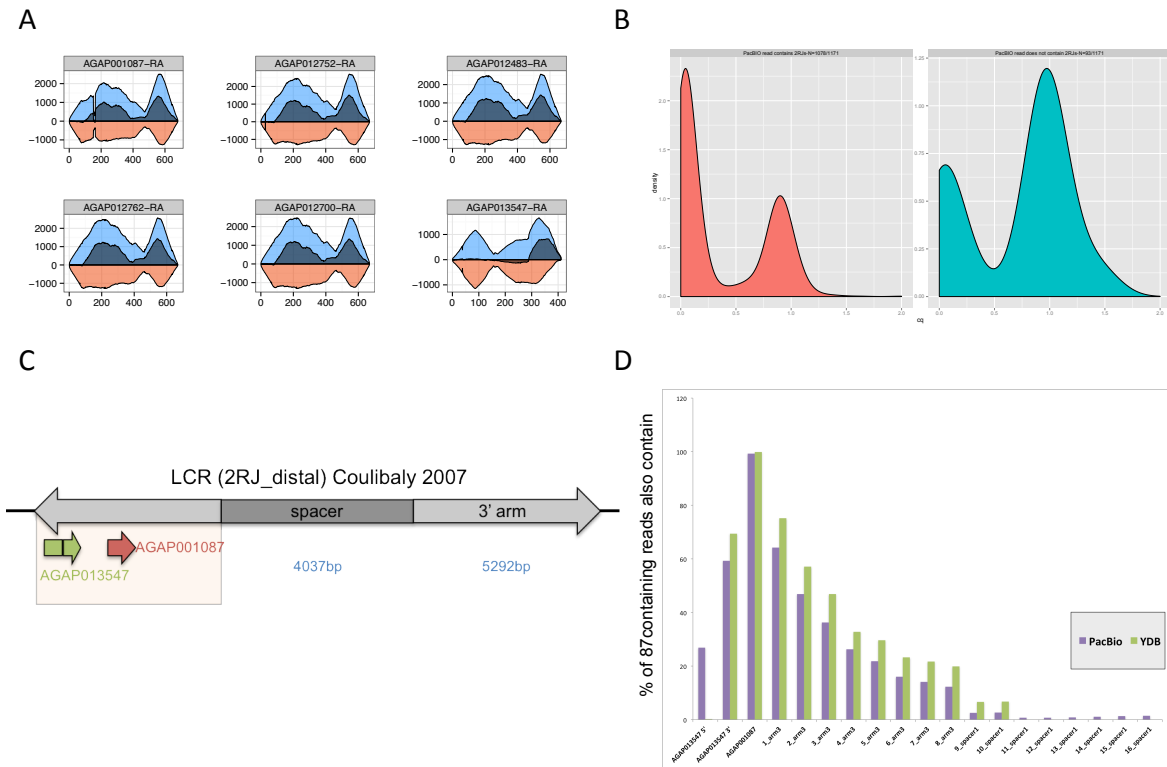

**Figure S9. Computational analysis of *changuu*.** (A) Spatial mapping of: AGAP001087, its annotated but unplaced homologs, and AGAP013547. Genomic reads are from males (light blue) and females (light red); the male-female difference is a darker shade of blue or red. (B) Density plot of CQ values for PacBio reads containing hits to both AGAP001087 and the masked 2Rj LCR sequences in red or no significant hits to the LCR in blue, highlighting that when present in PacBio reads, *changuu* drives CQ reductions. (C) Schematic representation of the 2Rj LCR showing the location of the AGAP001087 and AGAP013547 homologous sequences in the 5'-arm. (The 3'-arm is a mirror image, but the data are not shown). The breakpoint in AGAP013547 that is Y-specific is shown. Sequences upstream of the breakpoint are absent from the Y chromosome as seen in panel A. (D) Results of BLAST searches indicating a distance-dependent reduction in spacer matches in PacBio reads from Ydb (green) versus the entire PacBio data set ("PacBio"; purple). Notice the truncation of the 5'-end of the AGAP013547 homolog, which is specific to Ydb reads.

## **S4. Fluorescence *in situ* hybridization and estimating size of the Y chromosome**

### **S4.1. Fluorescence *in situ* hybridization**

#### S4.1.1. Methods

Mosquito strains: Laboratory colonies examined for this study were provided by the Malaria Research and Reference Reagent Resource Center (MR4). These included multiple colonies of *An. gambiae* (Pimperena, Asembo, Kisumu, Zanu), and *An. arabiensis* Dongola, *An. quadriannulatus* Sangwe, and *An. merus* MAF. Mosquitoes were reared at 27°C, with 12:12 light:dark cycle and 70% relative humidity.

Chromosome preparation: Most of the physical mapping was done on metaphase and prometaphase mitotic chromosomes sourced from leg and wing imaginal discs of early 4<sup>th</sup> instar male larvae. However, because the Y and X chromosomes are morphologically similar in *An. merus*, it was more difficult to verify whether imaginal disc preparations were from males (i.e., contained both X and Y chromosomes). Accordingly, for *An. merus* our preparations were derived from testes of late stage pupae, and mapping was done on metaphase I meiotic chromosomes. Chromosomes were prepared following ref. (26). Larvae or pupae were immobilized on ice for 10 minutes. Dissections were performed on microscope slides in a drop of cold freshly made hypotonic solution (0.075M KCl). A fresh drop of hypotonic solution was added to the preparation for 10 minutes, followed by fixation in a drop of modified Carnoy's solution (ethanol:glacial acetic acid, 3:1) for 1 minute. Next, a drop of freshly prepared 50% propionic acid was added and the preparation was immediately covered with a 22x22 mm coverslip. After 5 minutes, the preparation was squashed and dipped in liquid nitrogen for coverslip removal, followed by sequential dehydration steps in 70%, 80% and 100% ethanol. Slides with the highest number of metaphase plates were chosen for FISH.

Probe preparation and FISH: Genomic DNA was isolated from virgin males of the *An. gambiae* Pimperena strain using DNeasy Blood and Tissue Kit (Qiagen Inc., Valencia, CA, USA). Probes to perform FISH were generated by incorporating fluorescent labels during a PCR reaction. Primers for amplifying satellites AgY53A, AgY53B and AgY477 were obtained from ref. (22). For other targets, primers were designed using Primer 3 (27) (**Table S10**). For PCR labeling of satellites or TEs, each 25  $\mu$ l PCR mix consisted of 35-40 ng genomic DNA, 0.3 U Taq polymerase, 1 $\times$  PCR buffer, 200  $\mu$ M each of dATP, dCTP, and dGTP, and 65  $\mu$ M dTTP, and 0.5  $\mu$ l Cy3-dUTP or 0.5  $\mu$ l Cy5-dUTP (Enzo Life Sciences, Inc., Farmingdale, NY, USA) or 0.5  $\mu$ l Fluorescein-dNTP (Thermo Scientific, Waltham, MA, USA). Thermocycling was performed using ImmoMix <sup>TM</sup> (Bioline USA Inc., Taunton, MA, USA) beginning with a 95°C incubation for 10 minutes followed by 35 cycles of 95°C for 30 sec, 55°C for 30 sec, 72°C for 30 sec; 72°C for 5 min, and a final hold at 4°C. To prepare the *YG5* probe, a fragment of *YG5* was first amplified by PCR. Primers were then removed using Wizard SV Gel and PCR Clean-Up System (Promega, Madison, WI, USA). The PCR product was labeled by nick-translation: each 50  $\mu$ l reaction contained 1  $\mu$ g of DNA; 0.05 mM each of dATP, dCTP, and dGTP, and 0.015 mM of dTTP (Fermentas, Inc., Glen Burnie, MD, USA); 1  $\mu$ l of Cy3-dUTP or 0.5  $\mu$ l Cy5-dUTP (Enzo Life Sciences, Inc., Farmingdale, NY, USA); 0.05 mg/ml of BSA (Sigma, St. Louis, MO, USA); 5  $\mu$ l of 10x nick translation buffer; 20 U of DNA polymerase I (Fermentas, Inc., Glen Burnie, MD, USA); and 0.0012 U of DNase I (Fermentas, Inc., Glen Burnie, MD, USA). FISH was performed as described previously (26).

Image acquisition and processing: After FISH, chromosomes were counter-stained with DAPI-antifade (Life Technologies, Carlsbad, CA, USA), kept in the dark for at least 2 hours, and visualized on an Olympus BX61 fluorescent microscope using BioView software (BioView Inc.,



Billerica, MA, USA) at 1000x magnification. Individual channels of the same plate were merged and the brightness and contrast were adjusted (applied to an entire image) using Adobe Photoshop.

Laser capture microdissection of Y chromosomes and chromosome painting: Imaginal discs from 4<sup>th</sup> instar larvae of *An. gambiae* Pimperena were dissected in a drop of hypotonic solution (0.5% sodium citrate) and incubated for ~10 min. Imaginal discs were transferred to methanol:glacial acetic acid (3:1) fixative solution. Fixative solution was replaced by 60% acetic acid for tissue maceration. The solution was pipetted to homogenize the tissue to cell suspension condition. A membrane slide PET (Zeiss USA, Thornwood, NY, USA) was placed on a cold metal plate (-20°C) and ~10 µl of cell suspension was dropped onto the slide, allowing liquid to spread. The slide was placed on a heating table (45°C) to condense the drop. Cooling and heating were repeated five times, and then slides were left on the heating table to complete evaporation of liquid. Slides were dehydrated in 100% ethanol. After air-drying, Giemsa staining solution (1 ml of Giemsa to 10 ml sterile H<sub>2</sub>O) was added for 5 min, then excess stain was washed with sterile H<sub>2</sub>O. Slides were air-dried and stained in a controlled sterile climate to avoid contamination. Microdissection was performed using the PALM MicroBeam Laser Microdissection system (Zeiss USA, Thornwood, NY, USA) and the PALMRobo software as described previously (28). About 10-15 Y-chromosomes were microdissected from each slide by catapulting individual chromosomes without prior cutting. The captured Y chromosome material was dissolved in 10-15 µl of 1x PBS buffer and processed with the GenomePlex Single Cell WGA4 Kit (Sigma-Aldrich Co. LLC., St. Louis, MO, USA) protocol to produce the first library of amplified DNA. DNA was purified using the Genomic DNA Clean & Concentrator Kit (Zymo Research Corporation, Irvine, CA, USA). Amplified DNA was labeled for FISH using

the GenomePlex WGA3 Reamplification Kit (Sigma-Aldrich Co. LLC., St. Louis, MO, USA) using dNTP mix, described previously for labeling in PCR (28). FISH of labeled microdissected Y chromosomal DNA to mitotic chromosome squash preparations of *An. gambiae* Pimperena was performed according to ref. (26).

**Table S10.** Primers designed to amplify DNA probes for FISH.

| Target          | Primer Name | Sequence (5'-3')        |
|-----------------|-------------|-------------------------|
| <i>mtanga</i>   | YAR3F1      | CATGGGTTTCATCCTGCTCT    |
|                 | YAR3R1      | TCAATACTGCCCTTCCGAAC    |
| <i>zanzibar</i> | YAR2F2      | TTCTTCGATGTTGTGCTGGA    |
|                 | YAR2R2      | ATGGAGAAACAGGGCAACAA    |
| <i>zanzibar</i> | YAR4F1      | ATGCATGCTTGGATTCCTTC    |
|                 | YAR4R1      | GGTTTCTATGATCGCCTGGA    |
| <i>zanzibar</i> | YAR5F1      | TTGGCATTTCATCTGTCCAAA   |
|                 | YAR5R1      | GCACCCTTGATCTCATGTCA    |
| <i>YG5</i>      | <i>YG5F</i> | GACAGACCGACGGAGTAAGC    |
|                 | <i>YG5R</i> | CATGCCCGAGTGCATAAGTA    |
| <b>AgY53A</b>   | AgY53AF2    | ATGAAGAATATGGATAATGGAT  |
|                 | AgY53AR3    | ACGGGAGAGAGCAAGAACA     |
| <b>AgY53B</b>   | AgY53BF     | CCTTTAAACACATGCTCAAATT  |
|                 | AgY53BR     | GTTTCTTCATCCTTAAAGCCTAG |
| <b>AgY477</b>   | AgY477F2    | TTTGAGCATGTGTTTAAAGG    |
|                 | AgY477      | AGGTTTTCCCGAGTACAAT     |

The primers for AgY53A, AgY53B, and AgY477 amplify satellite monomers as described in ref. (22). The PCR probes included fragments for a total size of ~400-500 bp for AgY53A, AgY53B and 477-900 bp for AgY477.

#### S4.1.2. Results.

**Y satellites and zanzibar.** Satellite DNA repeats AgY53A and AgY53B showed similar patterns of hybridization to the *An. gambiae* Y chromosome (Fig. 4 and **Fig. S10**). Both probes were interspersed throughout ~70% of the Y chromosome on FISH images. In *An. arabiensis*, AgY53B showed an *An. gambiae*-like pattern of hybridization to the Y chromosome, but in *An. quadriannulatus*, hybridization was limited to a small region of the Y, and in *An. merus* AgY53B hybridized to multiple heterochromatin blocks that were stained by DAPI. AgY477 also showed an interspersed pattern in *An. gambiae* and *An. arabiensis*, but coverage and signal intensity was less than that observed for AgY53B. All the satellite DNA probes hybridized to both X and Y chromosomes. This can be due to the fact that the X and the Y share the same satellite monomers. However, this result can also be due to sequence similarity between different satellite monomers, which we could not control for in our FISH experiments, as our FISH probes contained the entire satellite monomer (in contrast to our computational analyses; see SI Appendix S5). For example, there is extensive sequence identity between AgY373/AgY477 and the X-biased satellite AgX367 (see **Fig. S6**) which would allow for cross-hybridization. In contrast to the satellite DNA, *zanzibar* hybridized exclusively to the Y chromosome in *An. gambiae* and *An. quadriannulatus*, and the signal covered ~50% of the Y chromosome. In *An. arabiensis*, *zanzibar* hybridized to a much smaller area of the Y chromosome (~20%), and *zanzibar* hybridization was not detected in *An. merus*.

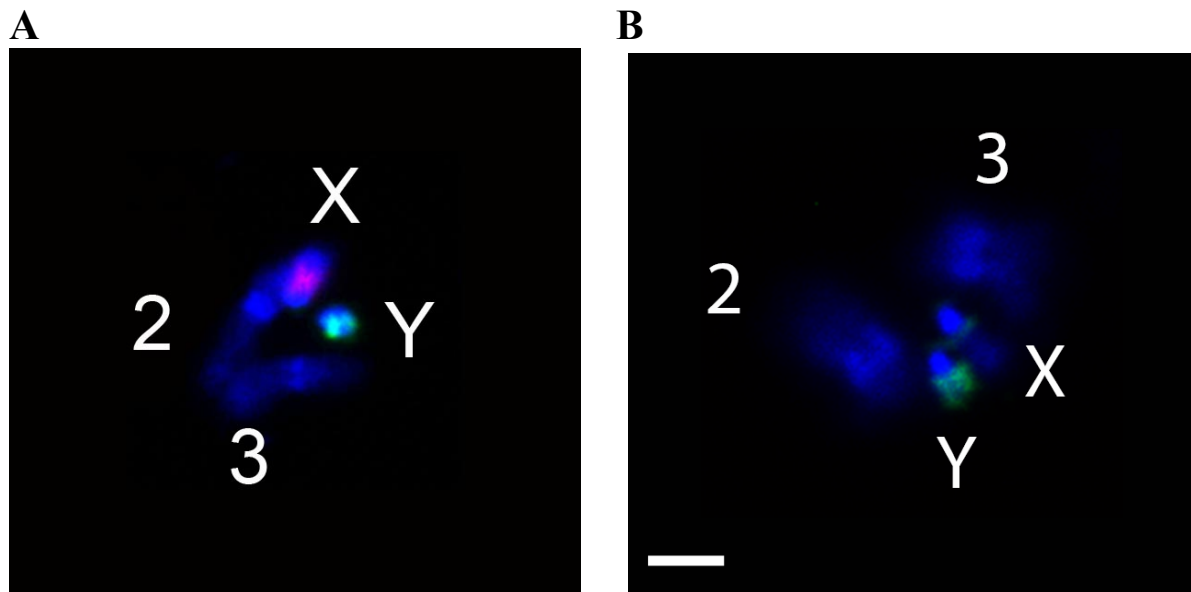

**Figure S10. Physical mapping of Y chromosome-biased satellite DNA sequences in *An. gambiae*.** (A) Satellite AgY53A (green signal) hybridized to most of the Y chromosome but not much to the X chromosome where the 18S rDNA probe (red signal) was seen in the *An. gambiae* Kisumu strain. (B) Satellite AgY477 (green signal) hybridized to a larger portion of the Y chromosome and to a smaller portion of the X chromosome in the *An. gambiae* Zanu strain. Chromosomes were counterstained with DAPI (blue). The scale bar is 2  $\mu$ m.

**YG5.** Our computational evidence was consistent with a Y chromosome location of *YG5* in *An. gambiae*, but an X chromosome location of *YG5* homologous sequences in *An. arabiensis* and *An. quadriannulatus*. FISH with *YG5* gave results consistent with this expectation (Fig. 4). *YG5* exclusively hybridized to a single location on the Y chromosome in *An. gambiae*. In *An. arabiensis* and *An. quadriannulatus*, *YG5* homologs were detected on the X and chromosome 2, but not on the Y.

**Chromosome painting with microdissected Y chromosomes.** FISH experiments with *An. gambiae* Pimperena based on microdissected and labeled whole Y chromosome sequence painted virtually the entire Y chromosome (Fig. 5A). Moreover, a substantial portion of X chromosome heterochromatin also was strongly painted. In addition, faint labeling of autosomal heterochromatin could be seen. This result demonstrates a substantial sequence similarity between sex chromosome heterochromatin, which is not shared to the same extent between the Y chromosome and any autosome. The FISH signal is likely driven by repetitive DNA (unique or low copy number sequences generally produce no, or very faint, signals); if so, this result is in good agreement with our computational evidence.

#### **S4.2. Estimated size of the Y chromosome.**

We measured sex chromosomes of metaphase plates from *An. gambiae* Pimperena males. Mitotic chromosome spreads were prepared from imaginal discs as described above. Images of DAPI-stained chromosomes obtained from confocal microscope Zeiss LSM 880 (Zeiss USA, Thornwood, NY, USA) were measured using ZenLite software. An important source of chromosome length variation is the degree of X chromosome condensation, which increases from prometaphase to metaphase. In order to minimize this variation, we excluded prometaphase stages from our calculations. Metaphase chromosomes were selected if they had well-separated

homologous chromosomes and identifiable sister chromatids. Prometaphase chromosomes, which had joined homologs and merged chromatids, were discarded.

Our strategy was to estimate the size of the Y chromosome in relation to the size of the assembled portion of the X chromosome. First, we measured the X chromosome from the telomere to the start of the ribosomal locus, which roughly corresponds to the portion (~25 Mb) that is assembled in the *An. gambiae* AgamP4 reference genome. We refer to this measurement as ( $X_{\text{assembled}}$ ). The rest of the X chromosome is unassembled, as it is heterochromatic like the Y chromosome. Next, we measured entire (full-length) X and Y chromosomes from each metaphase plate. The formula used to estimate the size of the Y chromosome based on this set of measurements was  $(25 \text{ Mb} * Y \text{ length in } \mu\text{m}) / (X_{\text{assembled}} \text{ length in } \mu\text{m})$ . Our calculations were based on 50 mitotic metaphase plates obtained from 8 *An. gambiae* Pimperena males. We found that the size of metaphase Y is approximately 36.7 Mb on average. The estimated size of the Y chromosome varied from 25.9 Mb to 47.8 Mb (**Table S11**). The size variation could be due to intraspecific polymorphism in the amount of the Y chromosome repeats and/or varying degree of chromosome condensation within metaphase.

**Table S11.** Estimated size of the *An. gambiae* Y chromosome.

| <b>Male No.</b> | <b>Repeated size estimates per male (Mb)</b> |       |       |       |       |       |       |       |       |       | <b>Mean</b> |
|-----------------|----------------------------------------------|-------|-------|-------|-------|-------|-------|-------|-------|-------|-------------|
| <b>1</b>        | 26.62                                        | 28.05 | 29.96 | 32.73 | 32.93 | 33.22 | 35.17 | 35.54 | 35.64 |       | 32.21       |
| <b>2</b>        | 29.27                                        | 30.38 | 36.44 | 36.97 | 38.17 | 44.12 |       |       |       |       | 35.89       |
| <b>3</b>        | 27.42                                        | 36.38 | 37.59 | 38.56 | 38.99 | 41.18 |       |       |       |       | 36.69       |
| <b>4</b>        | 33.48                                        | 33.70 | 35.62 | 35.94 | 36.17 | 47.83 |       |       |       |       | 37.12       |
| <b>5</b>        | 38.87                                        | 40.84 | 42.00 | 42.45 | 42.51 |       |       |       |       |       | 41.33       |
| <b>6</b>        | 43.04                                        | 43.17 | 43.37 | 45.60 | 46.85 |       |       |       |       |       | 44.41       |
| <b>7</b>        | 44.28                                        | 47.52 | 47.61 |       |       |       |       |       |       |       | 46.47       |
| <b>8</b>        | 25.93                                        | 27.40 | 30.14 | 30.61 | 31.60 | 33.22 | 33.73 | 33.74 | 34.68 | 38.10 | 31.92       |
| <b>Overall</b>  |                                              |       |       |       |       |       |       |       |       |       | 36.71       |

## **S5. Variation of Y repeats within *An. gambiae* and among species in the *An. gambiae* complex**

### **S5.1. Copy number variation in individuals from a natural population of *An. gambiae***

We analyzed Illumina genomic sequences from 40 individual males and 45 individual females to screen for variation in the abundance of genes and repeat features on the Y chromosome in a natural population sample from Cameroon. We aligned the sequences from each of the individual samples to consensus sequences of all Y-linked genes and repeat sequence types in Ydb, using Bowtie and allowing no mismatches over the entire length of the read (-v 0). For reference, we also aligned the individual sequences to a known single-copy gene on the X chromosome, *white* (29). To prevent over-counting, reads that aligned to a single consensus sequence multiple times were only counted once. In addition, due to regions of 100% sequence identity between AgY477 and AgY373 (see **Fig. S6**), the same Illumina read could align to both satellite consensus sequences. Such reads were counted only toward AgY477 alignments in **Tables S12-S14**. Accordingly, counts attributed to AgY477 in these tables (and in **Fig. S11**) should be considered as proxies for the combined AgY477/AgY373. **Table S12** reports the median number of reads mapping to each consensus sequence across the 40 male and 45 female samples, after normalizing for sample library size (to reads per million) and locus length. For each of the individual samples, we report the normalized number of mapped reads (**Tables S13-14; Other Supporting File 2**). There was little variation in the number of alignments among individual male or female samples for genes and most Y chromosome repeats (**Fig. S11, Tables S13-14; Other Supporting File 2**). However, we observed that two Y satellite repeats exhibited remarkable variation between individual males in the number of mapping reads (**Fig. S11, Table S13; Other Supporting File 2**). Tandem Repeats Finder (30) identified these sequences as

satellite monomers of 53 bp and 280 bp, respectively (AgY53D and AgY280), which occur interspersed in the same arrays (Fig. 2C; **Fig. S7**).

The maximum and minimum number of normalized unique alignments to AgY53D differed by >200x among individual male *An. gambiae* (Fig. 3, **Fig. S11, Table S13; Other Supporting File 2**). The median number of reads aligned was 6236 (**Table S12**). Six individual males had alignments in excess of ~5x the median number, and one exceptional individual had ~44x the median number. In this individual male, AgY53D had a comparable number of alignments to AgY477/Ag373 that together comprise >40% of the sequence in Ydb. To rule out that the expansion of AgY53D occurred on the autosomes or X, we also looked for similar patterns of expansion in females. Most females had zero alignments to AgY53D, and the maximum number of alignments to AgY53D in any female sample was 63 (**Table S14; Other Supporting File 2**). Therefore, we conclude that the amplification of AgY53D likely occurred on the Y chromosome. This dramatic diversity of satellite abundance between individual *An. gambiae* males likely underlies the observed polymorphism in Y chromosome size.



**Table S12.** Median number of reads from male and female *An. gambiae* from Cameroon aligned to reference Y sequences. The number of alignments were normalized to the reads per million from each sample and the length of each feature.

| <b>Name</b>     | <b>locus type</b> | <b>Median number of reads in males</b> | <b>Median number of reads in females</b> | <b>CQ</b> |
|-----------------|-------------------|----------------------------------------|------------------------------------------|-----------|
| <i>YG1</i>      | gene              | 413.62                                 | 2.05                                     | 0.00      |
| <i>YG2</i>      | gene              | 383.42                                 | 0.00                                     | 0.00      |
| <i>YG3</i>      | gene              | 33.71                                  | 16.06                                    | 0.48      |
| <i>YG4</i>      | gene              | 0.00                                   | 0.00                                     | N/A       |
| <i>YG5</i>      | gene              | 2656.85                                | 7.09                                     | 0.00      |
| <i>YG6</i>      | gene              | 11.69                                  | 20.58                                    | 1.76      |
| <i>YG7</i>      | gene              | 90.33                                  | 77.04                                    | 0.85      |
| <i>YG8</i>      | gene              | 4816.32                                | 63.03                                    | 0.01      |
| <i>zanzibar</i> | TE                | 121456.28                              | 308.10                                   | 0.00      |
| <i>mtanga</i>   | TE                | 26402.57                               | 55.59                                    | 0.00      |
| <i>pemba</i>    | TE                | 22108.57                               | 102.23                                   | 0.00      |
| <i>mafia</i>    | TE                | 15715.18                               | 695.36                                   | 0.04      |
| <i>bawe</i>     | TE                | 414.94                                 | 268.16                                   | 0.65      |
| <i>tumbatu</i>  | TE                | 1901.88                                | 581.34                                   | 0.31      |
| <i>chumbe</i>   | TE                | 9852.54                                | 172.46                                   | 0.02      |
| <i>uzi</i>      | TE                | 9585.47                                | 1411.60                                  | 0.15      |
| <i>latham</i>   | TE                | 1310.11                                | 0.00                                     | 0.00      |
| <i>changuu</i>  | TE                | 1578.17                                | 1599.09                                  | 1.01      |
| AgY280          | stDNA             | 378.54                                 | 0.00                                     | 0.00      |
| AgY373          | stDNA             | 297.30                                 | 35.31                                    | 0.12      |
| AgY477          | stDNA             | 334960.56                              | 1365.26                                  | 0.00      |
| AgY53A          | stDNA             | 193358.34                              | 18.62                                    | 0.00      |
| AgY53B          | stDNA             | 72255.83                               | 11.80                                    | 0.00      |
| AgY53D          | stDNA             | 6236.39                                | 0.00                                     | 0.00      |

|              |                                                      |        |        |      |
|--------------|------------------------------------------------------|--------|--------|------|
| <i>YG9</i>   | candidate gene<br>from <i>merus</i>                  | 114.62 | 119.61 | 1.04 |
| <i>YG10</i>  | candidate gene<br>from <i>merus</i>                  | 114.39 | 110.91 | 0.97 |
| <i>YG11</i>  | candidate gene<br>from <i>merus</i>                  | 94.04  | 115.48 | 1.23 |
| <i>YG12</i>  | candidate gene<br>from <i>merus</i>                  | 104.19 | 102.42 | 0.98 |
| <i>YG13</i>  | candidate gene<br>from <i>merus</i>                  | 118.55 | 124.23 | 1.05 |
| <i>white</i> | reference single<br>copy gene on the<br>X chromosome | 73.37  | 156.75 | 2.14 |

Reads were mapped individually for each sample using Bowtie with the k -1 parameter to avoid double counting reads and v -0 to include only reads that map over their entire length with 100% identity. Median values were then calculated for males and females separately. We normalized the data to reads per million for each sample. Read mapping data for all individual males and females are provided in Other Supporting File 2.

**Table S13.** Normalized number of reads from male *An. gambiae* from Cameroon aligned to a representative subset of Y sequences. The full data are provided in Other Supporting File 2. The number of alignments were normalized to the reads per million from each sample and the length of each feature.

| Name | YG2 | AgY477 | AgY373 | AgY53B | AgY53A | AgY53D | AgY280 | zanzibar |
|------|-----|--------|--------|--------|--------|--------|--------|----------|
| 22   | 383 | 387004 | 8374   | 87362  | 364967 | 3504   | 137    | 126317   |
| 23   | 338 | 281545 | 23561  | 52475  | 153867 | 1969   | 804    | 206160   |
| 24   | 614 | 315342 | 248    | 63755  | 199759 | 3497   | 157    | 108177   |
| 25   | 375 | 477715 | 414    | 53270  | 116858 | 38682  | 40820  | 139687   |
| 26   | 384 | 176528 | 448    | 75296  | 216147 | 2619   | 126    | 108075   |
| 27   | 344 | 201791 | 300    | 85189  | 192136 | 6189   | 1501   | 120859   |
| 28   | 417 | 536713 | 187    | 70785  | 109243 | 3304   | 961    | 108351   |
| 29   | 333 | 699638 | 162    | 40784  | 123324 | 2590   | 96     | 124266   |
| 30   | 368 | 358883 | 272    | 116442 | 86351  | 7382   | 4405   | 189906   |
| 31   | 377 | 203951 | 312    | 69103  | 131204 | 4016   | 385    | 75636    |
| 32   | 598 | 207328 | 216    | 122234 | 356627 | 4338   | 168    | 121977   |
| 33   | 360 | 210922 | 295    | 112867 | 492091 | 10272  | 80     | 110549   |
| 34   | 343 | 270550 | 237    | 81314  | 325015 | 4794   | 88     | 101283   |
| 35   | 276 | 379628 | 205    | 110934 | 183365 | 1222   | 177    | 131071   |
| 36   | 338 | 238602 | 260    | 80143  | 144874 | 74589  | 71080  | 159490   |
| 122  | 417 | 391415 | 359    | 52899  | 121259 | 3651   | 470    | 143233   |
| 123  | 423 | 162161 | 212    | 60602  | 91501  | 3684   | 173    | 133786   |
| 124  | 366 | 466993 | 259    | 43453  | 28327  | 30140  | 27735  | 140034   |
| 125  | 541 | 86501  | 362    | 103817 | 406284 | 100352 | 117083 | 127148   |
| 126  | 533 | 84247  | 294    | 99521  | 389353 | 96498  | 113135 | 122402   |
| 127  | 350 | 351446 | 380    | 75266  | 262638 | 8595   | 185    | 92348    |
| 128  | 413 | 792264 | 469    | 41398  | 104764 | 5256   | 2042   | 125937   |
| 129  | 374 | 230557 | 231    | 50466  | 287037 | 7810   | 493    | 117296   |
| 130  | 337 | 510385 | 169    | 108060 | 194581 | 6964   | 98     | 127420   |
| 131  | 346 | 486559 | 216    | 64041  | 195258 | 6679   | 336    | 110380   |
| 132  | 365 | 191654 | 349    | 95036  | 434640 | 15112  | 284    | 81940    |
| 134  | 426 | 402457 | 409    | 45484  | 124564 | 5247   | 5362   | 109586   |
| 135  | 382 | 539585 | 333    | 73726  | 130490 | 3399   | 130    | 128405   |
| 136  | 457 | 291267 | 294    | 44507  | 288880 | 6462   | 946    | 88547    |
| 222  | 922 | 321023 | 203    | 93830  | 134524 | 6847   | 1753   | 204880   |
| 223  | 345 | 509836 | 339    | 39750  | 45237  | 17907  | 15898  | 145958   |
| 224  | 453 | 401870 | 544    | 28384  | 65987  | 1867   | 266    | 120935   |
| 225  | 422 | 227596 | 517    | 61511  | 160303 | 6284   | 953    | 111241   |
| 226  | 389 | 356868 | 393    | 86259  | 238241 | 6807   | 841    | 97658    |
| 227  | 418 | 124870 | 280    | 32446  | 59464  | 2296   | 226    | 90153    |
| 228  | 367 | 535110 | 313    | 117624 | 368288 | 4807   | 74     | 106140   |
| 229  | 415 | 262808 | 402    | 48703  | 308803 | 6826   | 372    | 105492   |

|            |     |        |     |        |        |        |        |        |
|------------|-----|--------|-----|--------|--------|--------|--------|--------|
| <b>230</b> | 386 | 145126 | 238 | 100741 | 236432 | 275718 | 298089 | 130867 |
| <b>231</b> | 430 | 413157 | 274 | 97647  | 329902 | 7491   | 215    | 120824 |
| <b>233</b> | 390 | 348898 | 321 | 70256  | 200251 | 5124   | 30     | 125614 |

**Table S14.** Normalized number of reads from female *An. gambiae* from Cameroon aligned to a representative subset of Y sequences. The full data are provided in Other Supporting File 2. The number of alignments were normalized to the reads per million from each sample and the length of each feature.

| Name | gYG2 | AgY477 | AgY373 | AgY53B | AgY53A | AgY53D | AgY280 | zanzibar |
|------|------|--------|--------|--------|--------|--------|--------|----------|
| 64   | 1    | 1993   | 41     | 15     | 19     | 5      | 14     | 248      |
| 65   | 0    | 793    | 48     | 0      | 0      | 0      | 0      | 203      |
| 66   | 0    | 782    | 69     | 0      | 0      | 0      | 0      | 224      |
| 67   | 0    | 1388   | 165    | 1      | 0      | 4      | 0      | 164      |
| 68   | 0    | 1962   | 14     | 1      | 0      | 0      | 0      | 152      |
| 69   | 0    | 724    | 6      | 3      | 9      | 0      | 0      | 168      |
| 70   | 0    | 3347   | 256    | 12     | 36     | 4      | 7      | 360      |
| 71   | 0    | 1884   | 24     | 1      | 0      | 0      | 0      | 378      |
| 72   | 0    | 2178   | 19     | 12     | 35     | 0      | 0      | 260      |
| 74   | 0    | 921    | 8      | 0      | 0      | 0      | 0      | 388      |
| 75   | 0    | 1726   | 19     | 0      | 4      | 0      | 0      | 326      |
| 76   | 0    | 1096   | 68     | 5      | 19     | 0      | 0      | 271      |
| 87   | 0    | 1106   | 31     | 0      | 0      | 0      | 0      | 324      |
| 88   | 0    | 555    | 35     | 26     | 56     | 14     | 4      | 307      |
| 89   | 0    | 1568   | 24     | 25     | 152    | 2      | 0      | 371      |
| 90   | 0    | 517    | 24     | 0      | 0      | 0      | 0      | 208      |
| 91   | 0    | 649    | 6      | 0      | 0      | 0      | 0      | 343      |
| 93   | 1    | 873    | 29     | 19     | 6      | 8      | 5      | 284      |
| 94   | 0    | 75400  | 891    | 0      | 0      | 0      | 0      | 237      |
| 95   | 0    | 963    | 18     | 17     | 38     | 29     | 0      | 227      |
| 96   | 0    | 2168   | 7      | 0      | 0      | 63     | 0      | 357      |
| 191  | 0    | 893    | 27     | 0      | 5      | 0      | 0      | 283      |
| 192  | 0    | 882    | 82     | 2      | 0      | 0      | 0      | 298      |
| 193  | 1    | 2109   | 22     | 27     | 26     | 0      | 0      | 305      |
| 194  | 1    | 1113   | 32     | 41     | 105    | 4      | 7      | 328      |
| 196  | 0    | 847    | 18     | 0      | 0      | 0      | 0      | 317      |
| 197  | 1    | 1012   | 49     | 34     | 67     | 2      | 0      | 302      |
| 198  | 0    | 340    | 77     | 0      | 0      | 0      | 0      | 213      |
| 199  | 0    | 1987   | 22     | 49     | 123    | 2      | 4      | 328      |
| 200  | 0    | 884    | 98     | 44     | 101    | 6      | 4      | 409      |
| 201  | 0    | 1084   | 35     | 25     | 92     | 6      | 4      | 298      |
| 202  | 0    | 1365   | 27     | 37     | 46     | 10     | 0      | 293      |
| 280  | 0    | 2063   | 93     | 70     | 172    | 61     | 58     | 330      |
| 282  | 0    | 1336   | 106    | 24     | 65     | 3      | 0      | 287      |
| 283  | 0    | 1847   | 84     | 61     | 191    | 42     | 76     | 386      |
| 284  | 0    | 416    | 54     | 5      | 17     | 0      | 0      | 336      |
| 285  | 1    | 14173  | 43     | 36     | 117    | 0      | 0      | 455      |
| 286  | 0    | 35564  | 188    | 2      | 0      | 0      | 0      | 308      |

|            |   |       |     |    |     |    |    |     |
|------------|---|-------|-----|----|-----|----|----|-----|
| <b>287</b> | 1 | 14472 | 65  | 16 | 32  | 30 | 24 | 361 |
| <b>288</b> | 0 | 754   | 32  | 3  | 10  | 2  | 3  | 341 |
| <b>290</b> | 0 | 1627  | 29  | 0  | 0   | 0  | 0  | 244 |
| <b>291</b> | 0 | 3286  | 60  | 34 | 139 | 0  | 0  | 313 |
| <b>292</b> | 0 | 44435 | 232 | 22 | 53  | 2  | 0  | 390 |
| <b>294</b> | 0 | 17278 | 44  | 57 | 285 | 24 | 41 | 487 |
| <b>295</b> | 0 | 1901  | 49  | 15 | 48  | 0  | 0  | 312 |

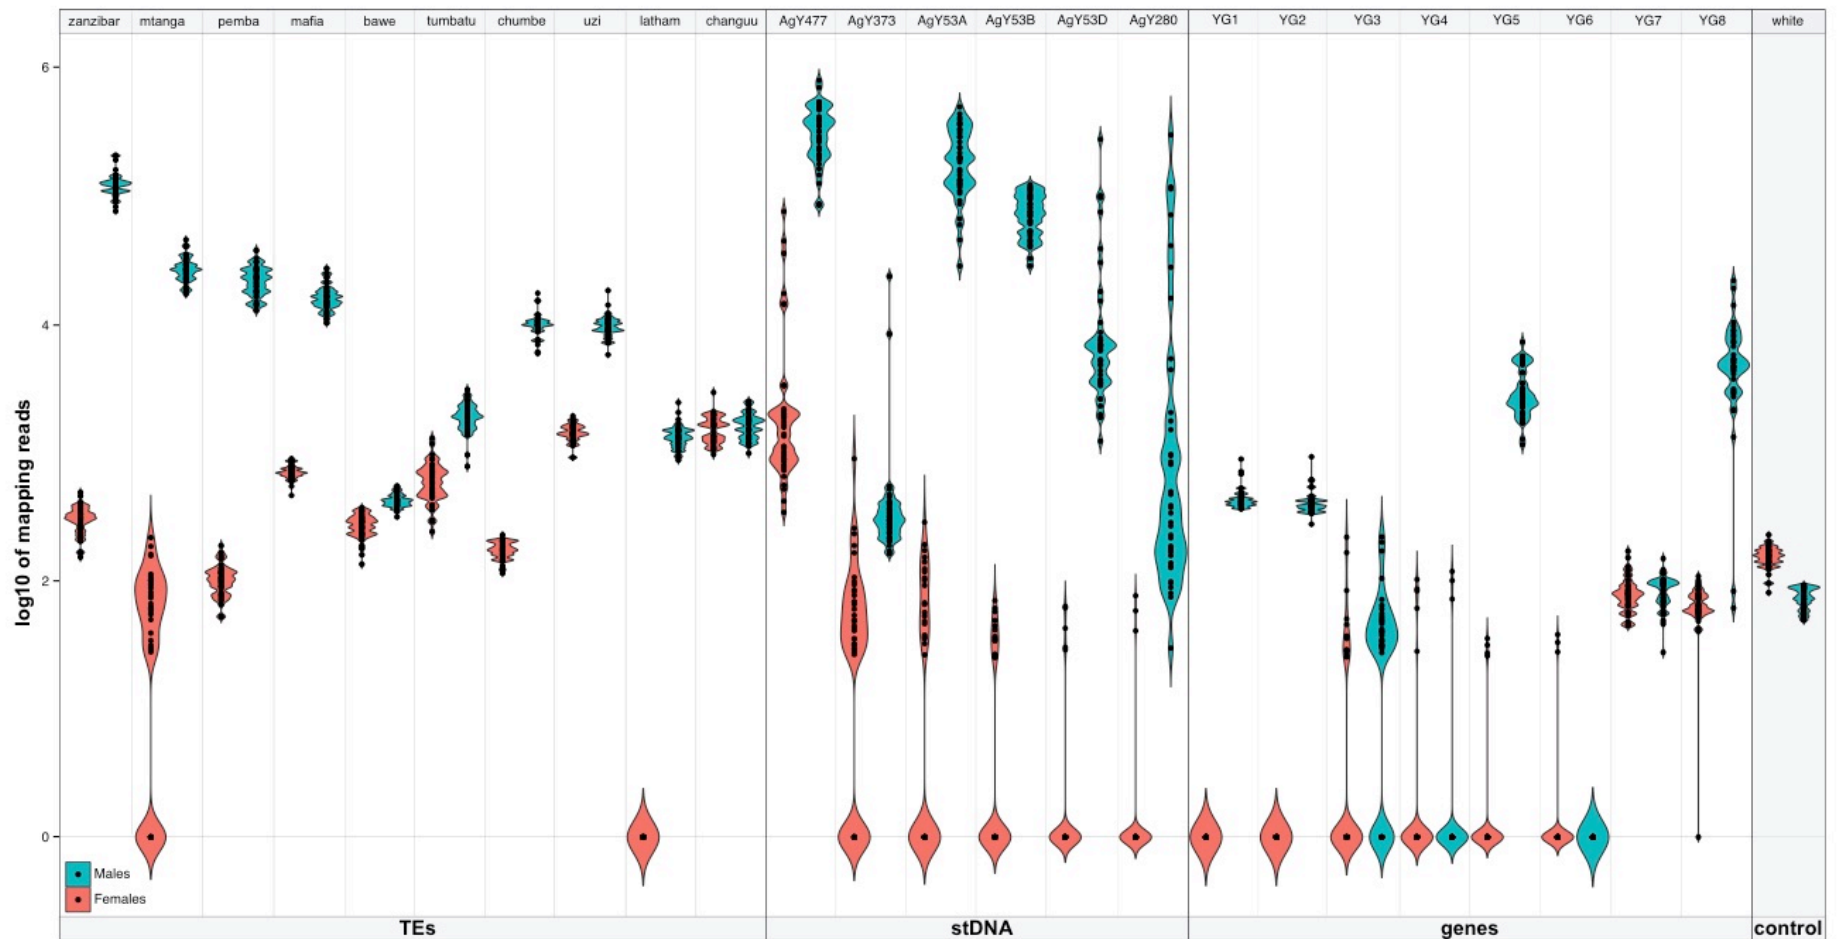

**Figure S11.** Violin plots of  $\log_{10}$  number of Illumina WGS normalized reads from individual male (blue) and female (red) *An. gambiae* mosquitoes from Cameroon mapped to all Y loci described. Reads were mapped individually for each sample using Bowtie with the  $k - 1$  parameter to avoid double counting reads and  $v - 0$  to include only reads that map over their entire length with 100% identity. Read numbers are normalized by library size and locus length and a minimum cutoff of 25 normalized reads per gene was imposed for a call to be made. Also shown, as a control, are the number of mapping reads against the X-linked single copy *white* gene of *An. gambiae*

## **S5.2. Repeat variation across the *An. gambiae* complex**

Dramatic variation in the presence or absence and abundance of Y repeats was observed across the *An. gambiae* complex. To examine these differences we used strict mapping with Bowtie and relaxed mapping with BWA-MEM using male and female Illumina sequences from three strains of *An. gambiae* and three other sibling species from the *An. gambiae* complex (*An. arabiensis*, *An. quadriannulatus*, and *An. merus*; see *SI Appendix S1.4-1.5*).

We used BWA-MEM to align male and female Illumina sequences from *An. arabiensis*, *An. quadriannulatus*, and *An. merus* to consensus sequences from the major repeat classes of the *An. gambiae* Y, to assess their presence and relative abundance in this recent species radiation. Species in the *An. gambiae* complex are very closely related, and because BWA-MEM allows for mismatches and gaps, Illumina sequences from other members of the complex should align to the *An. gambiae* consensus sequences. However, in the specific case of satellite sequences, we used BLASTN instead of BWA-MEM for interspecific comparisons. For the 53-bp satellites, we used BLASTN with the parameters: (word\_size 7 and evaluate 1e-10 and max\_target\_seqs 100000000). After BLASTN, we removed alignments of less than 60 bp and removed reads that aligned more than once, using the parameters awk and sort -u, respectively.

To evaluate the presence, absence, and relative abundance of Y repeats across the *An. gambiae* complex, we calculated CQ using the BWA-MEM and BLASTN alignments for all the major Y repeat classes. We also used relaxed alignment parameters to compensate for the nucleotide differences between the sibling species. To perform these alignments, we used BWA-MEM with default parameters. BWA-MEM can perform gapped alignments with several mismatches, which is ideal for applications involving less than 100% sequence identity. We call the ratio of female to male alignments with relaxed parameters the “relaxed” chromosome quotient (RCQ), to distinguish this approach from CQ. BWA-MEM did not perform well for the



53-bp satellites or satellite-specific regions of the closely related monomers AgY477/AgY373 because these sequences were very short, so we performed interspecific alignments to these satellites using BLASTN word\_size 7.

#### S5.2.1. AgY477 and AgY373

AgY477 and AgY373 are not Y-enriched in *An. merus*. We identified two segments of AgY477 and AgY373 that together define each satellite monomer and distinguish both from a closely related satellite monomer on the X chromosome, AgX367: (i) a 90-bp insertion found in both AgY477 and AgY373 (blue portion of **Fig. S6B**), and (ii) the last 85 bp of AgY373 (yellow portion of **Fig. S6B**). We used these two segments as our references for AgY477 and AgY373 in these analyses to prevent cross-alignments to sequences that are X-biased in *An. gambiae*. [Note that this approach was not followed in our physical mapping. As probes for FISH were derived from full-length monomers, the Y-biased satellites (AgY477 and AgY373) are expected to hybridize to the X chromosome by virtue of sub-sequences that are shared (at 100% identity) between these two satellites and the X-biased AgX367; see **Fig. S6**]. We found that both AgY477 and AgY373 are extraordinarily male-biased in *An. gambiae*, but present in approximately equal numbers in males and females of *An. merus*. This indicates that while in *An. gambiae* these satellites are primarily located on the Y, in *An. merus* they may be located on both the X and the Y or the autosomes (**Table S15**).

AgY477 and AgY373 are not present in *An. quadriannulatus*. Using BLASTN against the *An. quadriannulatus* Illumina data, we were unable to find sequences that aligned to either the 90 bp insertion into AgY477/AgY373 or the last 85 bp of AgY373 (**Table S15**). All the alignments to AgY477 and AgY373 in *An. quadriannulatus* appear to derive from AgX367-

related sequence outside of these segments—sequences that are not male-biased in *An. quadriannulatus*.

Using BLASTN against the *An. arabiensis* Illumina data, we could not find sequences that aligned to the 90 bp insertion into AgY477 and AgY373 in *An. arabiensis*. Furthermore, the last 85 bp of AgY373 appears to be truncated and alignments to this sequence are not male-biased (**Table S15**).

In summary, it appears that only in *An. gambiae* are AgY477 and AgY373 Y-enriched. In other members of the *An. gambiae* complex they are either absent altogether (*An. quadriannulatus* and *An. arabiensis*) or may be present on both X and Y or even the autosomes (*An. merus*).

#### S5.2.2. AgY53A and AgY53B

In *An. gambiae* and *An. arabiensis*, AgY53A and AgY53B are extremely male-biased. In contrast, in *An. merus* AgY53A and AgY53B are not Y-enriched; they are present equally in males and females (**Table S15**; **Table S7**). This result is supported by FISH, where AgY53B hybridizes equally both to the X and Y chromosome in *An. merus* (Fig. 4). AgY53B is much less abundant on the *An. quadriannulatus* Y, compared to other members of the *An. gambiae* complex (**Table S15**; **Table S7**). Using BLASTN with the parameters described above there were only 546 alignments to AgY53B from the male *An. quadriannulatus* data. This is in contrast to *An. gambiae*, *An. arabiensis*, and *An. merus* which all have from hundreds of thousands to more than a million alignments to AgY53B (**Table S7**).

#### S5.2.3. zanzibar is only amplified on the Y in *An. gambiae* and *An. quadriannulatus*.

In *An. gambiae* and *An. quadriannulatus*, the *zanzibar* consensus sequence has RCQ values of 0.066 and 0.063 compared to RCQ values of 1.033 and 0.841 in *An. merus* and *An. arabiensis*, respectively. These data suggest that there has been an approximately 10-20x increase in the amount of *zanzibar* on the Y chromosome in *An. gambiae* and *An. quadriannulatus* (**Table S15; Table S7**). Moreover, the *pemba* insertion into *zanzibar* appears to be shared by common ancestry between *An. gambiae* and *An. quadriannulatus*. Like *zanzibar*, the *pemba* insertion sequence has CQ values less than 0.07 in both *An. gambiae* and *An. quadriannulatus* (**Tables S6-S7**). Although *pemba* is present on the Y chromosome of *An. arabiensis* (as indicated by RCQ values and validated by genomic PCR), the *pemba* insertion into *zanzibar* appears to be specific to *An. gambiae* and *An. quadriannulatus*. We extracted 120 bp spanning both junctions, between *zanzibar* and the beginning and end of the *pemba* insertion (60 bp from *zanzibar* and 60 bp from either the 5'- or 3'-end of the *pemba* insertion). If a *pemba* insertion into *zanzibar* at this precise location was present in a species, Illumina reads should span these junctions; otherwise no junction-spanning reads should be found. To screen for junction-spanning reads, we filtered for alignment lengths >70 bp. No spanning reads were found in *An. arabiensis* or *An. merus*, yet thousands of spanning reads were found in *An. gambiae* (14,959) and *An. quadriannulatus* (15,400). We conclude that *pemba* is inserted into the exactly same *zanzibar* site in both species, *An. gambiae* and *An. quadriannulatus*, most likely due to an insertion event that preceded the lineage-splitting of these two taxa.

**Table S15.** Summary of repeat variation between species in the *An. gambiae* complex<sup>1</sup>

|                         | <i>An. gambiae</i>      | <i>An. quadriannulatus</i> | <i>An. arabiensis</i> | <i>An. merus</i>                                    |
|-------------------------|-------------------------|----------------------------|-----------------------|-----------------------------------------------------|
| ZAR <sup>2</sup>        | Y-biased<br>(Amplified) | Y-biased (Amplified)       | Slightly Y-biased     | Not Y-biased                                        |
| AgY477/373 <sup>3</sup> | Y-biased                | Absent                     | Absent <sup>3</sup>   | RCQ~1 <sup>3</sup>                                  |
| AgY53A <sup>4</sup>     | Y-biased                | Y-biased                   | Y-biased              | RCQ~1 <sup>4</sup>                                  |
| AgY53B <sup>5</sup>     | Y-biased                | Mostly absent              | Y-biased              | Even distribution on<br>X and Y, RCQ~1 <sup>5</sup> |
| AgY53D                  | Y-biased <sup>6</sup>   | Not found                  | Not found             | Low abundance,<br>RCQ ~ 0.6.                        |
| AgY280                  | Y-biased                | Not found                  | Not found             | RCQ ~0.7                                            |

<sup>1</sup>Summary is based on three types of data: (i) normalized reads mapped from males and females, which indicate presence/absence and relative abundance of a repeat; (ii) (R)CQ data (Tables S6-S7) which indicate Y chromosome bias; and (iii) physical mapping by FISH, to validate the bioinformatic data and rule out the possibility of repeats residing mainly on autosomes when RCQ≈1. Highlighted in red are cases supported by FISH results.

<sup>2</sup>The ZAR is slightly Y-biased in *An. arabiensis* and not Y-biased in *An. merus*. Based on the number of aligned reads ZAR does not appear to be amplified to the same extent in *An. arabiensis* and *An. merus* compared to *An. gambiae* and *An. quadriannulatus*. This conclusion is supported by FISH across all four species (Fig. 4).

<sup>3</sup>Y-biased distribution is confirmed by both RCQ (Table S7) and FISH (Fig. S10) in *An. gambiae*. In *An. arabiensis*, a sequence characteristic of AgY477/AgY373 Y-monomers in *An. gambiae* (the 90 bp insertion into AgY477 and AgY373; fig. S6B) is absent in males, although sequence homology to AgY373 is present in both males and females of this species. In *An. merus*, RCQ≈1, indicating that either AgY477/373 is present on both X and Y, or present on autosomes. Although we have no FISH data to distinguish these possibilities, either case represents radical sequence reorganization between the Y chromosomes of *An. gambiae* Y and *An. merus*.

<sup>4</sup>Y-biased distribution is confirmed by both RCQ (Table S7) and FISH (Fig. S10) in *An. gambiae*. In *An. arabiensis* and *An. quadriannulatus*, Y-biased distribution is indicated by RCQ. In *An. merus*, RCQ≈1 suggesting that either AgY53A is present on both X and Y, or present on autosomes. Although we have no FISH data to distinguish the two possibilities, either case represent radical sequence reorganization between the Y chromosomes of *An. gambiae* Y and *An. merus*.

<sup>5</sup>The pattern of AgY53B distribution is confirmed by both RCQ (Table S7) and FISH (Fig. 4) in all four species. In *An. merus*, RCQ≈1 and FISH data suggest equal distribution of AgY53B on X and Y (Fig. 4).

<sup>6</sup>AgY53D is absent in the Asembo strain of *An. gambiae*.

## S6. Y chromosome recombination

The Illumina deep genomic sequencing data from 40 and 45 individual males and females were analyzed for evidence of recombination between the X and Y chromosomes. We used Bowtie (-v 0) to perform the alignment as detailed in SI Appendix S5.

As shown in Fig. 5B, in a few individual females the relative abundance of AgY477 was exceptionally high relative to other individuals. The median number of normalized alignments from females to AgY477 was 1365 (**Table S12**). However, there were six females with more than 10x the median number, and one with 55x the median (**Table S14; Other Supporting File 2; Fig. S11**). Those females with elevated numbers of alignments to AgY477 may have acquired extra copies through illegitimate X/Y recombination.

The three 53-bp satellites (AgY53A, AgY53B, and AgY53D) showed an interesting pattern of alignments in the individual females (Fig. 5B, **Fig. S11**). While all males had hundreds or thousands of alignments to all three 53-bp satellites (**Tables S12-S13**) there were 18 female individuals with <10 alignments to all three 53-bp satellites (**Table S14; Other Supporting File 2**). In contrast, 9 individual females had >100 alignments to at least one of the satellite sequences. The most likely scenario to explain the variation in these individuals is that unequal X/Y recombination transferred some of the Y satellites to the X, consistent with additional evidence presented next.

An alternative hypothesis to X/Y recombination could be sperm contamination in the female samples, or laboratory contamination of female with male DNA. Both forms of contamination should affect all Y sequences, yet we do not observe a corresponding increase in female alignments to other Y chromosome satellites (**Table S14**). For example, in individuals with an elevated number of alignments to AgY477, there are not correspondingly elevated

numbers of alignments to the 53-bp satellites. Also, in many cases where one of the 53-bp satellites has an elevated number of alignments, one or both of the other 53-bp satellites do not have an elevated number of alignments. To further rule out contamination of female with male DNA, we examined the number of female alignments to a segment of *YG2* that is exclusive to the Y. All 45 female samples had <1 normalized alignment to *YG2* (**Table S14; Other Supporting File 2**).

Independent evidence of X/Y recombination comes from PacBio reads containing both the predominately X-linked (AgX367) and predominately Y-linked (AgY477/AgY373) satellites (22). Two PacBio reads with alignments of >98% identity to both AgY477/AgY373 and AgX367 were identified (Fig. 5C). Taken together with evidence of arrays containing recombinant monomers composed of portions of X-biased and Y-biased satellites (SI Appendix Text S3.1; **Fig. S5**), these results indicate that occasionally the X-biased satellite AgX367 recombines with the Y-biased satellites AgY477 and AgY373, a conclusion consistent with the high degree of sequence similarity between all three satellite monomers (**Fig. S6**).

## S7. Small and labile genic repertoire

### S7.1. Identifying candidate Y-linked genes in *An. gambiae*

Y chromosome genes are often located within complex arrays of repetitive DNA, making identification difficult. Gene-finding on the Y is further complicated by the potential absence of Y-linked genes in genome assemblies, and by cases where there is substantial sequence similarity between genes on the Y and homologs present on other chromosomes. To circumvent these complications and provide as comprehensive a catalogue of genes on the Y chromosome as possible, we implemented multiple, complementary strategies. For clarity, we catalogue a locus as a gene, if this locus is actively expressed based on RNA-Seq data and only if the sequence does not bear significant similarities to known anopheline repeats. In a few cases we also reported loci as genes, when expression levels were relatively low, but there was high similarity to an already annotated *An. gambiae* gene in VectorBase. The gene finding strategies we developed differed from each other in at least two important ways: 1) the sequences in which we searched for genes: genome assemblies, RNA-Seq reads, *de novo* transcriptome assemblies, or PacBio reads; and 2) whether we required the mean CQ of the gene to fall below a certain threshold. We were able to validate Y chromosome linkage of some genes using further experimental approaches, such as male specific genomic PCRs, or *in situ* hybridizations to mitotic chromosomes. For some genes however, experimental validation beyond our computational evidence was not possible. These are considered in our work as unconfirmed Y genes. The evidence of Y-linkage and male-biased expression of these genes are summarized in CQ and RCQ tables (**Table S6-S7**), spatial mapping analysis (**Fig. S12**), and expression profile analysis (**Fig. S13**).

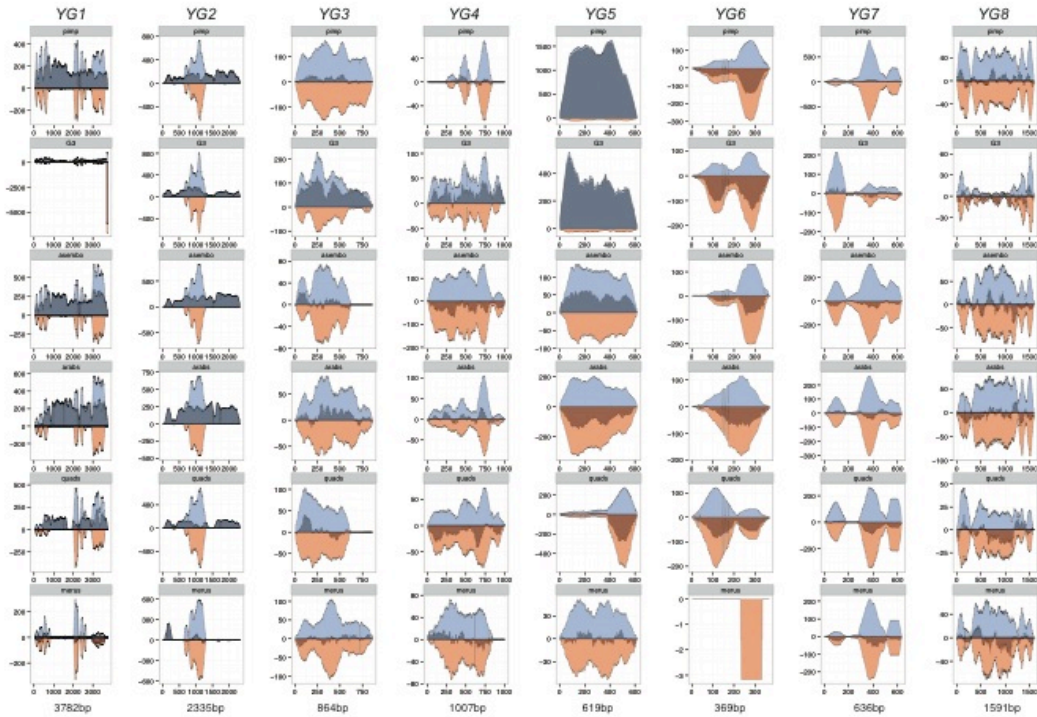

**Figure S12. Spatial mapping of male and female reads to the consensus sequences of the *An. gambiae* Y chromosome genes (plotted start to end on the x axis). Male reads are shown in light blue in the positive y-axis, female reads are shown in light red in the negative y-axis and the difference between male and female reads is shown in dark blue (for male bias) or dark red (for female bias). For each row, reads from different species or strains is used: pimp: *An. gambiae* Pimperena; G3: *An. gambiae* G3; asembo: *An. gambiae* asembo; arabs: *An. arabiensis*; quads: *An. quadriannulatus*; merus: *An. merus*.**



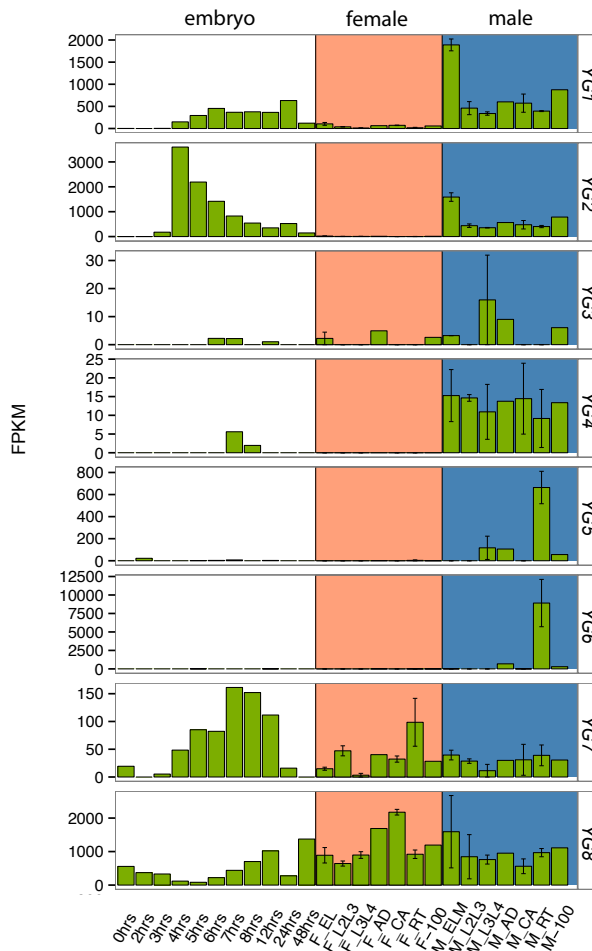

**Figure S13. Expression profile analysis of *An. gambiae* Y chromosome genes.** Normalized counts of reads mapping to each of the verified or candidate Y chromosome genes. Embryonic stages (from wild type embryos) are shown in hours post egg laying, F\_EL: female early larvae; F\_L2L3: female L2-L3 instar larvae; F\_L3L4: female L3-L4 larvae; F\_AD: female adults; F\_CA: female dissected carcass without ovaries; F\_RT: female ovaries; M\_EL: male early larvae; M\_L2L3: male L2-L3 instar larvae; M\_L3L4: male L3-L4 larvae; M\_AD: male adults; M\_CA: male dissected carcass without ovaries; M\_RT: male reproductive tissues (testes and accessory glands). F\_100 and M\_100 are *in silico* merged datasets of male- and female-only data.

### S7.1.1. Methods and results:

#### S7.1.1.1. CQ-based gene finding:

A given sequence typically displays a mean CQ lower than 0.2 if it is either specific to the Y chromosome (*e.g.*, for single copy genes), or if it is present on the Y in many more copies than elsewhere in the genome (for multi-copy genes). Using the criterion of mean  $CQ \leq 0.2$  (as we have throughout this work) we initially searched for Y-linked genes by a number of strategies briefly described below, and highlight the genes uncovered by each.

To identify Y genes in Ydb, we first ran RepeatMasker using the latest available *An. gambiae* repeats library in VectorBase, updated with the major Y chromosome repeat classes. We split the resulting repeat masked Ydb sequences into sections at masked bases and removed sequences smaller than 200 bp. Then we calculated CQs for the resulting sequences using male and female genomic Illumina data from *An. gambiae* Pimperena and G3, and retrieved sequences with  $CQ \leq 0.2$  having at least 20 read alignments from males. To identify transcribed loci we then aligned RNA-Seq data from our libraries. The genes *YG1*, *YG2* and *YG5* were identified in several PacBio reads using this method.

To identify genes in transcriptome assemblies, we performed *de-novo* assembly of RNA-Seq samples using Trinity (31). We built an initial set of libraries independently using 14 sequenced samples of male-derived RNA-Seq data, but later repeated this with the entire dataset and our gene-finding results did not differ. Trinity was run using default settings for paired end RNA-Seq except for requiring a minimum contig length of 150bp (`-- min_contig_length 150`). To identify Y chromosome sequences from these Trinity assemblies we applied the CQ method with Pimperena and G3 Illumina sequences, and collected predicted transcripts with  $CQ \leq 0.2$  having at least 20 read alignments from males. We identified 1,893 predicted transcripts that

passed this criterion. To distinguish those transcripts that are not TE-like, we first removed sequences that were masked by RepeatMasker using the *An. gambiae* repeats library as above. We also performed BLASTX against the NCBI non-redundant database and removed any sequences with alignments to bacteria or transposable elements. To eliminate repetitive sequences and select only those that are unique to the Y chromosome, we removed sequences with more than 10 alignments with BLASTN to the autosomes or X in the PEST assembly. Finally, we used our RNA-Seq dataset to remove sequences without male-specific expression. While the predicted transcripts were often fragmented in the assemblies, we were able to find *YG1* and *YG2* in all of the transcriptome assemblies made from libraries after 2 hours of embryonic development. Furthermore, we identified *YG4* in transcriptome assemblies of post-embryonic samples, and *YG5* from samples derived from adult males.

To identify genes in the PEST assembly, paired RNA-Seq reads were mapped to the PEST assembly using Tophat (32). To identify novel transcribed regions (NTRs) we ran Cufflinks *de novo* (32) using the assembled PEST genome along with corresponding gene sets (in GTF) as a reference. We generated an expanded merged transcriptome, containing all previously known genes (AGAPs) and non-redundant NTRs. When this analysis was performed, AgamP3.7 was the latest available gene set and it contained 13465 loci and 15322 transcripts with a total length of 27747499 bp. The Cufflinks *de novo* analysis added a large number of novel transcribed regions: 11340 loci, 13974 transcripts and 19829594 bp. Because these NTRs fell mainly under the class of repetitive elements (see below) and the underlying genome assembly remained mostly unchanged, for logistical reasons we did not repeat such a *de novo* assembly with later VectorBase gene set updates. We combined the annotated transcriptome with the NTRs and re-mapped all RNA-Seq datasets independently to identify male-biased or male-

specifically expressed genes using the DESeq package (16). Mean CQ was then calculated for the male-biased merged transcriptome. In total, 79 loci appear both male-biased in expression and had a  $CQ \leq 0.2$ . The majority of these were on the Y-unplaced or the UNKN chromosome, some were in autosomes and none were mapped to the X chromosome. We subsequently performed BLASTN and ran RepeatMasker against the repeat library to eliminate those loci that are likely TEs. This method identified *YG4* (annotated on the UNKN), and *YG5* (as a duplication putatively arising from AGAP13757) and re-identified *YG1* and *YG2* in the Y\_unplaced scaffold.

#### S7.1.1.2. Non-CQ based methods: identifying non-unique Y genes in Ydb

All pipelines for identifying Y linked loci described above require that mean CQ falls at or below our selected cutoff of 0.2. This is effective for finding loci that are either relatively specific to the Y (see below), or for those that are more abundant on the Y than in other chromosomal locations (e.g. *YG5*). It is important to note that the CQ method was successfully used to identify Y-linked genes that have autosomal homologs of >95% nucleotide identity because 100% identical alignments of short reads can differentiate highly similar sequences (9). Nonetheless, to identify possible Y-linked genes that have nearly identical or a large number of non-Y paralogs, which may be missed by CQ analysis, we took advantage of our long reads database, with the expectation that neighboring regions of such loci could provide sufficient evidence for their Y linkage, a strategy of “guilt by association”. We searched using BLASTN within Ydb for homologs of known *An. gambiae* transcripts (AgamP4.4) with a cutoff e-value of  $1e-50$  and a minimum sequence identity of 80%. To avoid BLAST hits being predominantly mediated by poor annotation that includes TEs, we first masked transcripts using the *An. gambiae* repeat library. This filter eliminated 19 of the 66 transcripts with alignments to Ydb. We used two

criteria to consider genes as good candidates for inclusion. First, we counted the number of unique Ydb reads per transcript and only transcripts that had hits to more than five Ydb sequences were considered ( $n=16$ , **Table S16**). Second, a good Y chromosome candidate would be a transcript that commonly co-occurs on the same PacBio read with major Y chromosome repeat features in Ydb, but does so much less frequently across the entire PacBio dataset.

Of the 16 annotated transcripts, three are homologous to *YG1* and/or *YG2* (AGAP004894-RA; AGAP001079-RA; AGAP001078-RA) and one is homologous to *YG5* (AGAP013757-RA); these four were not characterized further. Among the 12 remaining annotated transcripts, we discovered two cases of redundancies arising from multi-gene families, different members of which shared sequence similarity to the same PacBio reads. While all members of these families were included in subsequent analysis, for simplicity we refer to these two families (comprising 4 and 6 annotated genes) by the names of their two Y-linked members (*YG6* and *changuu*, respectively). Through this analysis, we identified three more candidate genes, *YG6*-*YG8*, and the *changuu* repeat (**Table S16**).

Table S16. Sixteen transcripts with more than 5 hits to Ydb after repeat masking

|    | Y locus     | number of times in YDB | paralogue  | Chr  | length | %blast length | Read CQ_C | Read CQ_Rel | Gene CQ_C | Gene CQ_Rel | Spatial Mapping | Match to Repeats | %length repeat |
|----|-------------|------------------------|------------|------|--------|---------------|-----------|-------------|-----------|-------------|-----------------|------------------|----------------|
| 1  | YG5         | >500                   | AGAP013757 | 3R   | 618    | 100.97        | 0.32      | 0.08        | 0.26      | 0.06        | male biased     | #N/A             | #N/A           |
| 2  | changuu     | >500                   | AGAP012762 | UNKN | 668    | 71.71         | 0.07      | 0.32        | 0.62      | 0.59        | male biased     | Agam_m8bp_Ele13  | 6.59           |
| 3  |             | >500                   | AGAP012752 | UNKN | 669    | 71.9          | 0.18      | 0.41        | 0.87      | 0.6         | male biased     | Agam_m8bp_Ele13  | 6.58           |
| 4  |             | >500                   | AGAP012700 | UNKN | 668    | 71.86         | 0.18      | 0.41        | 0.76      | 0.61        | male biased     | Agam_m8bp_Ele13  | 6.59           |
| 5  |             | >500                   | AGAP012483 | UNKN | 668    | 71.71         | 0.07      | 0.32        | 0.62      | 0.59        | male biased     | Agam_m8bp_Ele13  | 6.59           |
| 6  |             | >500                   | AGAP001087 | X    | 680    | 72.21         | 0.07      | 0.32        | 1.36      | 0.62        | male biased     | Agam_m8bp_Ele13  | 6.47           |
| 7  |             | 358                    | AGAP013547 | X    | 411    | 62.04         | 0.24      | 0.68        | 1.25      | 0.81        | male biased     | #N/A             | #N/A           |
| 8  | YG1 and YG2 | 76                     | AGAP004894 | 2L   | 726    | 27            | 0         | 0.26        | 0.99      | 0.99        | non biased      | #N/A             | #N/A           |
| 9  |             | 72                     | AGAP001079 | X    | 727    | 26.96         | 0         | 0.26        | 1.08      | 0.99        | non biased      | #N/A             | #N/A           |
| 10 |             | 72                     | AGAP001078 | X    | 727    | 26.96         | 0         | 0.26        | 1.08      | 0.99        | non biased      | #N/A             | #N/A           |
| 11 | YG7         | 16                     | AGAP010291 | 3R   | 636    | 72.64         | 0.01      | 0.07        | 1.44      | 0.96        | non biased      | #N/A             | #N/A           |
| 12 | YG6         | 7                      | AGAP013235 | X    | 540    | 83.89         | 0.19      | 0.71        | 2.32      | 2.03        | female biased   | #N/A             | #N/A           |
| 13 |             | 7                      | AGAP012536 | UNKN | 757    | 71.47         | 0.23      | 0.8         | 2.04      | 1.89        | female biased   | #N/A             | #N/A           |
| 14 |             | 6                      | AGAP013428 | X    | 582    | 88.66         | 0.19      | 0.71        | 1.7       | 1.92        | female biased   | #N/A             | #N/A           |
| 15 |             | 4                      | AGAP013444 | X    | 570    | 83.68         | 0.1       | 0.7         | 2.25      | 2.12        | female biased   | #N/A             | #N/A           |
| 16 | YG8         | 6                      | AGAP008501 | 3R   | 1591   | 60.28         | 0.12      | 0.68        | 1.01      | 0.94        | non biased      | #N/A             | #N/A           |

### S7.1.2. Description of Y Genes

*YG1* and *YG2* were previously described; both RNA-Seq and RT-PCR indicate early-embryonic expression starting from 2-4 hours after oviposition (9). The two genes are overlapping and expressed from opposite strands so unique query sequences or primers were used to differentiate the expression patterns between the two genes. Using our new and expansive RNA-Seq datasets we confirmed that these two genes are abundantly expressed in males throughout development, both in somatic and reproductive tissues. *YG2* expression begins at 3 hours after egg-laying and reaches its maximal expression in the male at 4 hours of embryonic development. For *YG1*, expression begins at 4 hours after egg-laying, one hour later than *YG2*, but remains low during embryogenesis. Expression peaks at the transition between embryo and larvae (**Fig. S13**).

There are a number of sequences similar to *YG1* and *YG2* throughout the PEST assembly including some annotated genes (9). To gain an understanding of chromosomal distribution of sequence similarity between these Y-linked sequences and their counterparts on other chromosomes, we performed BLASTN analysis against the PEST assembly and the assemblies of the other three species (**Fig. S14**). We also performed CQ, RCQ and spatial mapping with these genes (**Table S6-S7; Fig. S12**). We find that Y-specificity of these sequences is not uniform throughout the length of the transcripts (**Fig. S12, S14**). The first two exons of *YG2* occur uniquely on the Y chromosome, which overlaps with the PCR amplicon sequences we used for phylogenetic reconstruction (SI Appendix S8). CQ, RCQ and spatial mapping using male and female WGS Illumina sequences from the other species revealed that *YG2*—and importantly the exons that encode the putative male-determining factor—are present on, and unique to, the Y chromosome in all species examined. *YG1* is present on the Y of *An. arabiensis* and *An. quadriannulatus*, but evidence of Y-linkage is ambiguous in *An. merus* (**Fig. S12**).

We have evidence that *YG2* exists on the Y in multiple copies nearly identical in sequence. In the multiple sequence alignment of a 755 bp segment of *YG2* (PCR-amplified from individual male mosquitoes sampled from natural populations and colonies, and used for phylogenetic reconstruction (SI Appendix S8; Other Supporting File 3), two positions—335 and 427—were polymorphic in Cameroon samples of *An. gambiae* and the same positions also were segregating for the same polymorphisms in our RNA-Seq data and Illumina sequences from different sources (*An. gambiae* G3 and Pimperena), indicating that the polymorphisms are unlikely to be sequencing error or PCR artifacts, and suggesting that they are transcribed. Next, we retrieved 73 Ydb PacBio reads overlapping the 755 bp *YG2* segment, and added them to the alignment. We observed both polymorphic sites represented multiple times among the PacBio reads. **Table S17** summarizes the observed frequencies in all our data sets.

Remarkably, sites 335 and 427 were highly correlated in the 73 PacBio sequences, visible by eye (**Fig. S15**) and tested statistically (after discarding minor alleles,  $D = 0.16$ ; Correlation test  $P < 2.2e-16$ ; Fisher exact test  $P = 5.03e-11$ ). The powerful advantage of the PacBio Ydb reads is not merely their added length, but also the fact that they are derived from a single paternal Y chromosome, as the template DNA for PacBio sequencing was derived from sons descended from a single pair mating of *An. gambiae*. Accordingly, each PacBio read is not only one haplotype, but each haplotype observed necessarily represents a different copy of the *YG2* locus, assuming no Y chromosome mutational events between generations and mitotic replications.

It is important to note that these sequence differences at position 335 and 427 between *YG2* copies are downstream from the presumptive 56-aa coding region, and therefore would not be expected to affect the encoded protein sequence. However, both mutations appear to affect

5'-splice sites, thus they potentially cause alternative splicing patterns. The overall very high degree of nucleotide similarity between these copies of *YG2* suggests that gene conversion may act to correct mutational differences and preserve function, as observed for amplified genes on human and ape Y chromosomes (33).

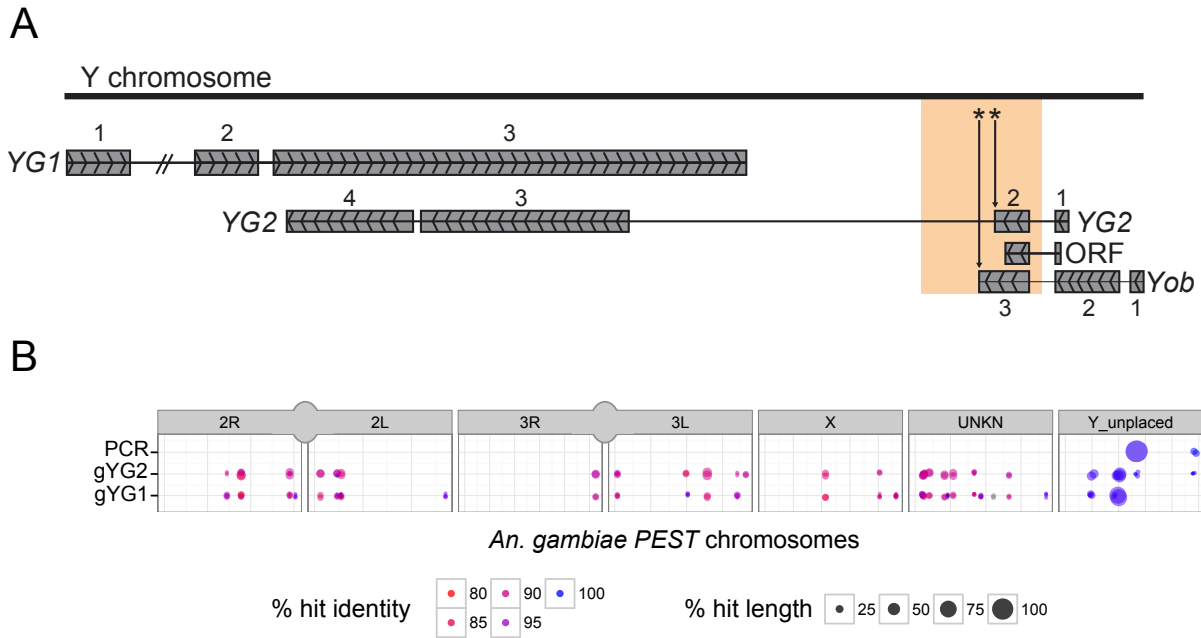

**Figure S14. BLASTN analysis of *YG1* and *YG2* against the *An. gambiae* PEST assembly.**

A) Overlapping locus organization of *YG1* and *YG2* highlighting the location of the ORF and the PCR amplicon used for phylogenetic reconstruction (orange box). Numbers on top of transcripts indicate exon numbers. The asterisks indicate positions of polymorphisms that lead to alternative splicing. B) Results from BLASTN hits of the *YG1*, *YG2* transcript sequences and the sequence of the PCR amplicon used for phylogenetic reconstruction against the *An. gambiae* PEST assembly. The results show that the region used for PCR is Y specific, while partial but never complete regions of *YG1* and *YG2* have hits elsewhere in the genome.



**Table S17.** Polymorphisms in *An. gambiae* YG2 sequence observed in 4 data sets

| <i>An. gambiae</i> YG2 sequence source | YG2 Alignment Position <sup>1</sup> |            |
|----------------------------------------|-------------------------------------|------------|
|                                        | 335                                 | 427        |
| PCR amplicons (Cameroon field samples) | 3 C, 14 T                           | 4 G, 13 A  |
| Illumina genomic sequence (Pimperena)  | 33 C, 38 T                          | 62 G, 45 A |
| RNA-Seq (G3)                           | 88 C, 131 T                         | 18 G, 30 A |
| Ydb PacBio reads (Pimperena)           | 52 C, 21 T                          | 54 G, 19 A |

<sup>1</sup>YG2 sequence alignment provided as Other Supporting File 3.

|                 |           | 335    | 427 |
|-----------------|-----------|--------|-----|
| EC-read-Y.15819 | 17-729    | GTAATA |     |
| EC-read-Y.26478 | 3-705     | GTAATA |     |
| EC-read-Y.26476 | 3-718     | GTAATA |     |
| EC-read-Y.26479 | 2106-2827 | GTAATA |     |
| EC-read-Y.53002 | 610-1298  | GTAATA |     |
| EC-read-Y.26480 | 1-698     | GTAATA |     |
| EC-read-Y.26477 | 2172-2875 | GTAATA |     |
| EC-read-Y.58751 | 55-828    | GTAATA |     |
| EC-read-Y.19668 | 578-1299  | GTAATA |     |
| EC-read-Y.74269 | 152-920   | GTAGTA |     |
| EC-read-Y.50841 | 5634-6404 | GTAGTA |     |
| EC-read-Y.19471 | 2046-2809 | GTAATA |     |
| EC-read-Y.76151 | 485-1228  | GTAGTA |     |
| EC-read-Y.55248 | 591-1329  | GTAATA |     |
| EC-read-Y.32587 | 331-1073  | GTAATA |     |
| EC-read-Y.50707 | 2909-3660 | GTAATA |     |
| EC-read-Y.19670 | 600-1334  | GTAATA |     |
| EC-read-Y.53003 | 4650-5383 | GTAATA |     |
| EC-read-Y.377   | 2670-3414 | GTAATA |     |
| EC-read-Y.79070 | 1443-2184 | GTAATA |     |
| EC-read-Y.67281 | 2281-3022 | GTAGTA |     |
| EC-read-Y.65167 | 598-1373  | GCAGTA |     |
| EC-read-Y.18060 | 370-1158  | GCAGTA |     |
| EC-read-Y.18058 | 485-1270  | GCAGTA |     |
| EC-read-Y.76149 | 607-1380  | GCAGTA |     |
| EC-read-Y.48365 | 58-832    | GCAGTA |     |
| EC-read-Y.57184 | 2255-3032 | GCAGTA |     |
| EC-read-Y.14152 | 362-1134  | GCAGTA |     |
| EC-read-Y.55921 | 365-1139  | GCAGTA |     |
| EC-read-Y.594   | 59-836    | GCAGTA |     |
| EC-read-Y.4373  | 59-839    | GCAGTA |     |
| EC-read-Y.79340 | 2005-2783 | GCAGTA |     |
| EC-read-Y.75935 | 2838-3616 | GCAGTA |     |
| EC-read-Y.12747 | 1457-2238 | GCAGTA |     |
| EC-read-Y.34662 | 3187-3962 | GCAGTA |     |
| EC-read-Y.27704 | 1325-2105 | GCAGTA |     |
| EC-read-Y.23300 | 452-1232  | GCAGTA |     |
| EC-read-Y.76153 | 365-1136  | GCAGTA |     |
| EC-read-Y.79339 | 58-830    | GCAGTA |     |
| EC-read-Y.31167 | 4051-4814 | GCAGTA |     |
| EC-read-Y.37845 | 1081-1838 | GCAGTA |     |
| EC-read-Y.3233  | 3090-3853 | GCAGTA |     |
| EC-read-Y.18061 | 63-860    | GCAGTA |     |
| EC-read-Y.18064 | 390-1183  | GCAGTA |     |
| EC-read-Y.48366 | 1069-1840 | GCAGTA |     |
| EC-read-Y.225   | 1307-2088 | GCAGTA |     |
| EC-read-Y.53001 | 4399-5132 | GCAGTA |     |
| EC-read-Y.13310 | 606-1354  | GCAGTA |     |
| EC-read-Y.34796 | 5599-6371 | GCAGTA |     |
| EC-read-Y.40906 | 482-1252  | GCAGTA |     |
| EC-read-Y.13312 | 623-1399  | GCAGTA |     |
| EC-read-Y.11208 | 779-1554  | GCAGTA |     |
| EC-read-Y.79142 | 2144-2919 | GCAGTA |     |
| EC-read-Y.56036 | 427-1202  | GCAGTA |     |
| EC-read-Y.31994 | 1248-2024 | GCAGTA |     |
| EC-read-Y.13611 | 3398-4174 | GCAGTA |     |
| EC-read-Y.74734 | 904-1682  | GCAGTA |     |
| EC-read-Y.55324 | 4721-5493 | GCAGTA |     |
| EC-read-Y.71764 | 483-1258  | GCAGTA |     |
| EC-read-Y.31212 | 3431-4208 | GCAGTA |     |
| EC-read-Y.19669 | 4611-5353 | GCAGTA |     |
| EC-read-Y.45342 | 1783-2525 | GCAGTA |     |
| EC-read-Y.55249 | 4592-5331 | GCAATA |     |
| EC-read-Y.13309 | 1434-2175 | GCAGTA |     |
| EC-read-Y.13311 | 1441-2189 | GCAGTA |     |
| EC-read-Y.76150 | 1403-2138 | GCAATA |     |
| EC-read-Y.76152 | 1416-2166 | GCAGTA |     |
| EC-read-Y.48367 | 428-1203  | GCAGTA |     |
| EC-read-Y.23299 | 3755-4529 | GCAGTA |     |
| EC-read-Y.28512 | 69-844    | GCAGTA |     |
| EC-read-Y.18059 | 63-849    | GCAGTA |     |
| EC-read-Y.66918 | 399-1171  | GCAGTA |     |
| EC-read-Y.60286 | 3674-4448 | GCAGTA |     |

**Figure S15. Sequence alignment of 73 Ydb PacBio reads, showing only the two non-adjacent *YG2* polymorphic sites, positions 335 and 427.** The color-coded columns display alignment positions 334-336 and 427-429, respectively, with respect to the *YG2* sequence alignment given in Other Supporting File 3.

**YG3** was originally reported in ref. (9). Interestingly, *YG3* is on the Y chromosome of *An. gambiae* only in the G3 colony, based on evidence from CQ and spatial mapping. Similar computational results did not support Y linkage of this gene in the Pimperena and Asembo colonies (**Tables S6-S7**). Unsurprisingly, given the Pimperena origin of Ydb, querying this database with *YG3* by BLASTN returned no significant hits. The gene does not encode any apparent ORFs and is 864 bp in length. Expression analysis using RNA-Seq data from the G3 strain indicates that this locus is expressed at low levels, detectable mostly in male L3-L4 instar larvae and whole adults. We did not detect expression in our dissected tissues (carcass and reproductive tissues) so it is currently unclear where within the male this gene is expressed. Male-specific genomic and RT-PCR confirmed the presence and expression of *YG3* on the Y of the G3 strain (9).

**YG4** was identified with two CQ-based approaches: in the pool of Trinity-predicted transcripts and in the loci of the PEST assembly that displayed low CQ and male biased expression. The Trinity-predicted transcripts corresponding to *YG4* were inaccurately split into two fragments, so we anchored the predictions made by Cufflinks on the PEST assembly (Unknown\_Chr: 14402957-14404138) to assemble the gene model for *YG4*. Similar to *YG3*, *YG4* appears to be Y-linked only in the G3 strain of *An. gambiae* based on CQ and spatial mapping (**Tables S6-S7; Fig. S12**). Therefore BLASTN against Ydb with *YG4* as a query recovered no significant hits. RNA-Seq data supported male-specific expression of *YG4* in all post-embryonic developmental stages, albeit at weak levels compared to other Y-linked genes (**Fig. S13**).

**YG5** was identified with all gene-finding approaches. *YG5* is homologous to the autosomal gene AGAP013757 on chromosome 3. Because orthologs of AGAP013757 have preserved synteny with neighboring genes in the assemblies of *An. gambiae*, *An. arabiensis*, *An. quadriannulatus* and *An. merus* (**Fig. S16**), we suggest that AGAP013757 is the ancestral copy of this gene and that *YG5* arose through duplication onto the Y chromosome. *YG5* likely encodes a DNA-binding protein based on the presence of topoisomerase and zinc-RING finger domains. Both *YG5* and its autosomal homolog AGAP013757 are expressed exclusively in the male testis based on RNA-Seq data and RT-PCR (**Fig. 1, Fig. S13**), indicating that *YG5* may be important for male fertility, possibly by regulating chromatin condensation during spermatogenesis and male meiosis. Compared to AGAP013757, the *YG5* sequence contains a number of male-specific SNPs that could not be detected in PCR products amplified from females using primers that anneal to AGAP013757 (and also match *YG5*; data not shown). We used these *YG5*-specific SNPs to confirm male-specific expression, by sequencing RT-PCR products from male testis (data not shown). *In situ* hybridization of *YG5* to mitotic male chromosomes also confirmed Y linkage, and revealed that *YG5* is located at the tip of the Y chromosome (**Fig. 1, Fig. S17**).

CQ and spatial mapping analysis of the region surrounding AGAP013757 on chromosome 3 suggested that the duplication event that copied AGAP013757 to the Y chromosome (*YG5*) also resulted in the copying of 1791 base pairs flanking the ORF, likely the regulatory regions that regulate sperm-specific expression. Within the subset of 898 Ydb reads that contain *YG5*, we calculated the most frequent associations with all other Y-linked loci and found that *changuu* (the Y-linked LCR-related element) co-occurred in 53% of the reads (**Fig. 1B**). Within these 898 reads we also found at least three other TEs from the *An. gambiae* repeats library, namely Agam\_CR1\_Ele15 (in 121 reads), Agam\_Pao\_Bel\_Ele46 (in 179 reads) and

Agam\_CR1\_Ele7 (in 396 reads). To characterize the organization of *YG5* we selected reads containing both *YG5* and *changuu* and aligned male and female Illumina sequences from the Pimperena strain, to compare relative copy number, investigate Y-linkage, and characterize the structure and frequency of *YG5* and *changuu* junctions on representative PacBio reads. We conclude that the original duplication event resulted in the integration of *YG5* into the *changuu* locus, followed by amplification of the combined sequences on the Y chromosome. It is possible that multiple copies of *YG5* supplement gene expression, and/or help preserve *YG5* sequences from mutational inactivation on the Y chromosome as suggested above.

Interestingly, while *YG5* is Y-linked in *An. gambiae*, analysis by CQ, RCQ and spatial mapping analysis (**Tables S6-S7; Fig. S12**) indicates X-linkage and amplification of *YG5*-homologous sequences in *An. quadriannulatus* and *An. arabiensis*. In *An. merus*, computational evidence was inconsistent with sex chromosome linkage or amplification. We confirmed X-linkage of *YG5* homologs in *An. quadriannulatus* and *An. arabiensis* by *in situ* hybridization to male mitotic chromosomes (**Fig. S17**). To test whether the X chromosome homologs of *YG5* in *An. quadriannulatus* and *An. arabiensis* and *YG5* in *An. gambiae* are derived from a single duplication event that occurred prior to the species split or arose independently later, we searched by BLAST for *YG5* within the genome assemblies of *An. quadriannulatus* and *An. arabiensis*. We found two genes within two different (non-redundant) contigs, homologous to *YG5* orthologue in the *An. arabiensis* assembly, namely AARA005061 on contig APCN01002478 and AARA010330 on contig APCN01001040. Based on synteny we concluded that scaffold APCN01002478 and the gene within it AARA005061, represent the original autosomal position of AGAP013757. CQ analysis of these two contigs using male and female Illumina sequences from *An. arabiensis* was consistent with X-linkage of contig APCN01001040

(contig CQ=1.7). At the 3' end of this *An. arabiensis* contig we found sequences homologous to *YG5* and its junction with *changuu* present that occur on the Y chromosome of *An. gambiae*. Although CQ, RCQ and spatial mapping confirmed that *changuu* is female-biased in *An. quadriannulatus* as well as *An. arabiensis* (Tables S6-S7), we were not able to find contigs containing *YG5* homologs in BLAST searches of the *An. quadriannulatus* assembly. To test whether the *YG5* homolog on the X chromosome of *An. quadriannulatus* is also associated with *changuu* as it is in *An. gambiae* and *An. arabiensis*, we extracted a 120 bp sequence from Ydb reads representing the junction between the 3' end of *YG5* and *changuu* on the Y chromosome of *An. gambiae*. We then used this junction sequence as a query in BLAST searches of Illumina sequences from males and females of all three species, and calculated CQ (Table S18). In *An. gambiae* the *YG5-changuu* junction had matches exclusively from males confirming specificity to the Y-chromosome. In contrast, in both *An. quadriannulatus* and *An. arabiensis* the CQ of reads mapping from males and females were indicative of X linkage. We obtained the same result, when using the homologous 120 bp junction sequence from the *An. arabiensis* contig APCN01001040 (Table S18). This confirmed that the *YG5* homolog is located next to *changuu* also in *An. quadriannulatus*. We concluded that the insertion of a *YG5* homolog into *changuu* preceded radiation of the species complex, on an ancestral X or Y chromosome.

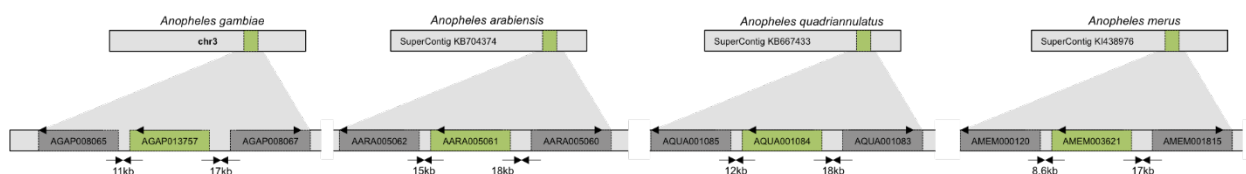

**Figure S16. Preservation of synteny of AGAP0013757, the autosomal *YG5* homolog, in genome assemblies of the *An. gambiae* species complex.**

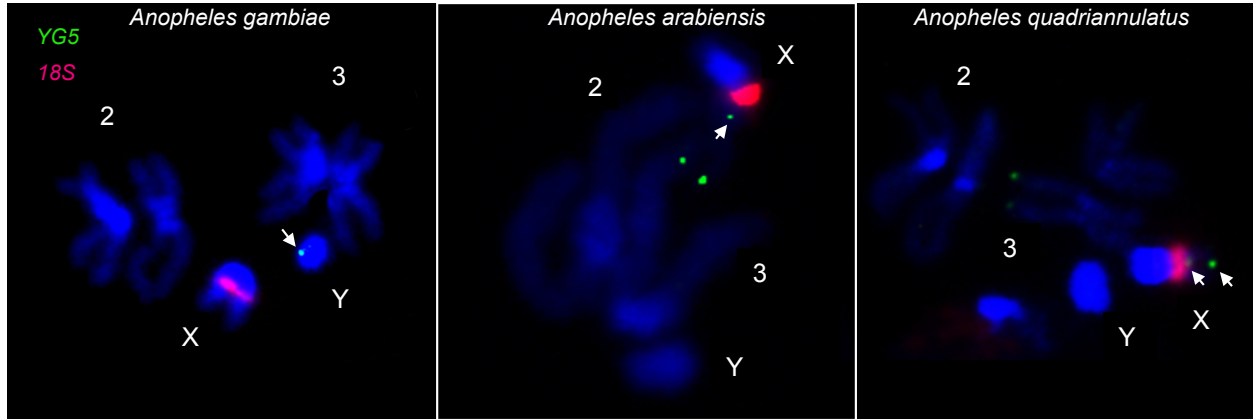

**Figure S17. Physical mapping of YG5.** FISH with YG5 (green label) confirms Y chromosome linkage in *An. gambiae* and X chromosome linkage in *An. arabiensis* and *An. quadriannulatus*. The 18S ribosomal rDNA gene is shown in red.

**Table S18.** Quantification of YG5-*changuu* junctions indicating number of normalized reads matching to the 120-bp sequences in each sex and species with CQ values.

|                                     | <i>An. gambiae Pimperena</i> |        |      | <i>An. Arabiensis</i> |        |      | <i>An. Quadriannulatus</i> |        |      |
|-------------------------------------|------------------------------|--------|------|-----------------------|--------|------|----------------------------|--------|------|
|                                     | Male                         | Female | CQ   | Male                  | Female | CQ   | Male                       | Female | CQ   |
| Junction YG5- <i>changuu</i>        | 1171.31                      | 0.00   | 0.00 | 54.38                 | 88.00  | 1.62 | 52.01                      | 121.00 | 2.33 |
| Junction AARA010330- <i>changuu</i> | 1172.32                      | 0.00   | 0.00 | 56.55                 | 87.00  | 1.54 | 50.95                      | 121.00 | 2.37 |

**YG6:** Based on our RNA-Seq data, all six annotated transcripts from the gene family related to *YG6* (AGAP012356, AGAP012998, AGAP013104, AGAP013235, AGAP013428 and AGAP013444) are expressed exclusively in male reproductive tissues (**Fig. S18**). Of the six annotated genes, five have assigned chromosomal locations in a repetitive region of the X chromosome at ~17 Mb, consistent with mean gene CQ of 1.7 and 2.7 in the *Pimperena* and G3 strains, respectively (**Table S6**). We only found seven Ydb reads containing *YG6*. The Y copy is flanked by a single *zanzibar* insertion (which drives inclusion into Ydb). To examine whether the Y-linked homolog was expressed, two *YG6*-containing Ydb PacBio reads were compared to the RNA-Seq data. Matching sequences were split into 20-mers using jellyfish (34). Equivalent kmers were generated by chopping male and female WGS and RNA-Seq Illumina sequences that aligned to the two Ydb PacBio reads. We used relaxed mapping parameters with Bowtie2 default settings and required that each kmer occur > 50 times to be included in the analysis. We found 215 male-specific kmers (mskmers) in the RNA-Seq data, but these RNA-mskmers were not represented in genomic-mskmers. As all *YG6* paralogs of this gene are expressed exclusively in male reproductive tissues, it is possible that the 215 RNA-mskmers are in fact derived from non-Y chromosome homologs of *YG6* and that *YG6* itself is not actively expressed. Alternatively, *YG6* is not sufficiently diverged from its non-Y homologs to provide genomic mskmers, which require that a kmer does not occur in female genomic sequence.



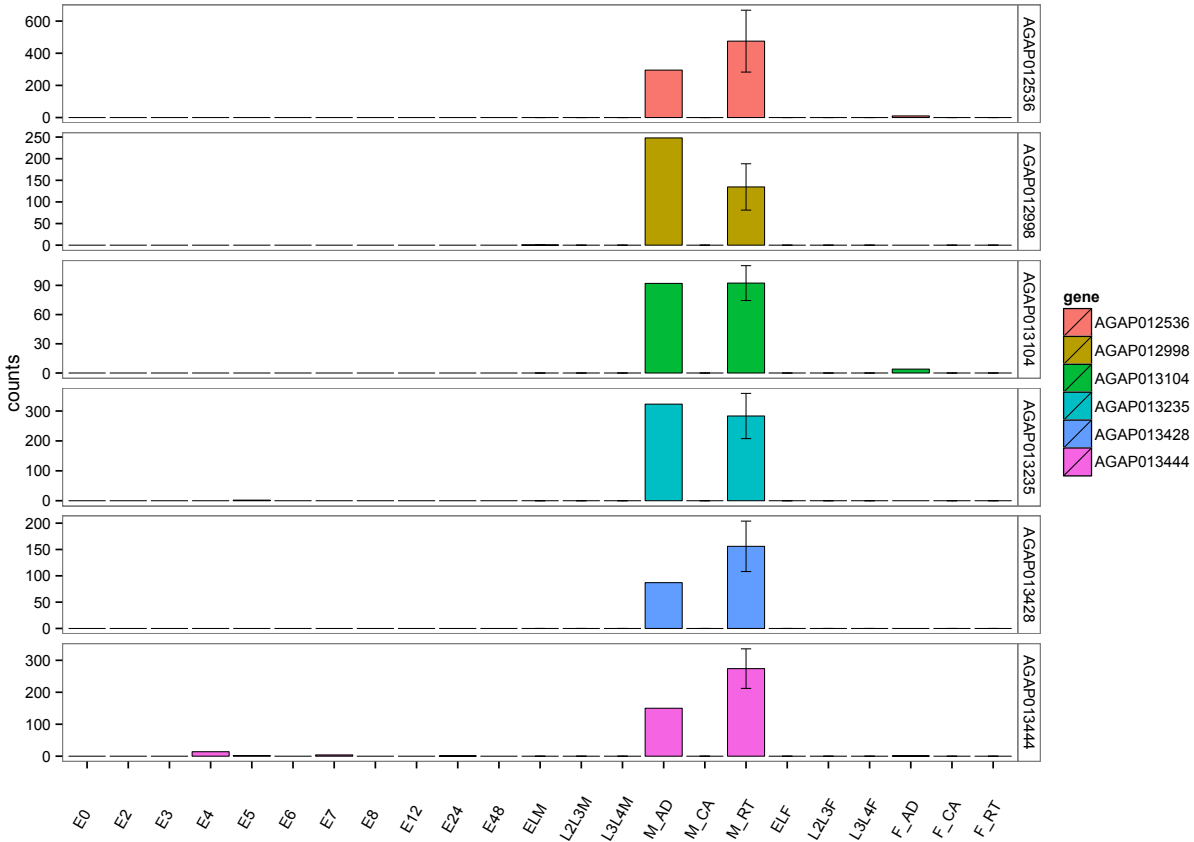

**Figure S18. Expression profile analysis of six X chromosome or autosomal homologs of *YG6*.** *YG6* homologs are expressed exclusively in male reproductive tissues across development. En: embryo sample and hours post egg laying; ELM: Early male larvae; L2L3M: L2-L3 instar male larvae; L3L4M: L3-L4 instar male larvae; M\_AD: male adult; M\_CA: Male dissected carcass; M\_RT: Male reproductive tissues; ELF: Early female larvae; L2L3F: L2-L3 instar female larvae; L3L4F: L3-L4 instar female larvae; F\_AD: female adult; F\_CA: Female dissected carcass; F\_RT: Ovaries 48hrs post bloodfeeding.

**YG7** is homologous to AGAP010291, located on chromosome 3R with no known annotated function. Our RNA-Seq data indicates weak *YG7* expression throughout development, with a peak of expression during embryogenesis. Our evidence for Y chromosome linkage in the Pimperena strain is co-occurrence in 16 Ydb reads with *zanzibar* (out of 467 PacBio reads genome-wide that contain *YG7* homologs). Like *YG6*, there are no shared mskmers between RNA-Seq and genomic sequences, indicating either that *YG7* is not expressed from the Y chromosome in the stages of development sampled, its expression cannot be detected at the selected sequencing depth, or its sequence has not significantly diverged from non-Y copies.

**YG8** is homologous to AGAP008501 which encodes a ubiquitously expressed glutaryl-CoA dehydrogenase. Evidence for Y-linkage is the presence of the gene in six Ydb PacBio reads that also contain *zanzibar* and the *mafia* TEs. In the entire PacBio dataset there are 67 reads that contain the gene, of which only 15 also contain *zanzibar*. The autosomal assembly of AGAP008501 does not contain gaps, and *zanzibar* is not present. Similar to *YG6* and *YG7*, there are no shared mskmers between RNA-Seq and genomic sequences, indicating that *YG8* is either not expressed sufficiently to be detected given the available sequencing depth, is not expressed from the Y chromosome in the stages of development we have selected, or that its sequence has not significantly diverged from copies not located on the Y chromosome. Further evidence for Y-linkage comes from deep WGS Illumina sequencing of 40 individual *An. gambiae* males from Cameroon, in which there are approximately 76x more reads of *YG8* in male samples compared to females (**Tables S12-S14**).

## **S7.2. Identification of Y chromosome genes in other members of the *An. gambiae* complex.**

### **S7.2.1. Using RNA-Seq data from the *Anopheles* 16 genome project to identity Y genes in other members of the *An. gambiae* complex.**

We used RNA-Seq data from the *Anopheles* 16 genome project (35) to search for Y chromosome genes in *An. merus* (SRX200223), *An. arabiensis* (SRX004365) and *An. quadriannulatus* (SRX096314). We assembled the RNA-Seq data with Trinity. Trinity was run in with the default setting for paired-end RNA-Seq data, except for the following parameters: (--min\_contig\_length 150). To identify Y chromosome sequences from these Trinity assemblies we used the CQ method and our male and female pooled Illumina data from these species to identify sequences with  $CQ \leq 0.2$ .

To identify non-repetitive Y genes we first removed sequences that were masked by RepeatMasker using the repeats library for each species. We also performed BLASTX against the NCBI nr database and removed any sequences with alignments to bacteria or transposable elements. To further eliminate repetitive sequences we removed sequences with more than 10 alignments with BLASTN to the female-derived genome assemblies from the three species.

Using this approach we identified *YG1* in *An. arabiensis* and *An. quadriannulatus*, and *YG2* in all three species. In *An. arabiensis*, no novel Y chromosome genes were identified. In *An. quadriannulatus*, two novel candidate genes named *YG15* and *YG16* were identified. These may be exons of the same gene because they align to nearby regions of the X chromosome.

### **S7.2.2. Using *An. gambiae* transcripts to identity Y genes in other members of the *An. gambiae* complex.**

Using BWA-MEM we mapped the male and female reads from *An. arabiensis*, *An. quadriannulatus*, and *An. merus* to *An. gambiae* transcripts. RCQs were calculated based on

these results. No *An. gambiae* transcripts with  $CQ \leq 0.2$  were identified in *An. arabiensis*. We identified five *An. gambiae* transcripts with  $CQ \leq 0.2$  in *An. merus* (YG9-YG13) (Table S19), and one *An. gambiae* transcript with  $CQ \leq 0.2$  in *An. quadriannulatus* (YG14) (Table S20). Due to the number of alignments in the other *An. gambiae* complex members (Tables S6-S7), these genes are likely the result of duplications to the Y followed by amplifications on the Y.

**Table S19.** RCQs of *An. gambiae* transcripts based on *An. merus* Illumina sequences

| Transcript           | Length | An. merus female alignments | An. merus male alignments | RCQ   |
|----------------------|--------|-----------------------------|---------------------------|-------|
| YG9 (AGAP009631-RA)  | 2118   | 1540                        | 12639                     | 0.122 |
| YG10 (AGAP009632-RA) | 3387   | 2928                        | 21514                     | 0.136 |
| YG11 (AGAP009633-RA) | 883    | 676                         | 3500                      | 0.193 |
| YG12 (AGAP009636-RA) | 1210   | 983                         | 6428                      | 0.153 |
| YG13 (AGAP009637-RA) | 2169   | 1821                        | 11713                     | 0.155 |

**Table S20.** RCQs of *An. gambiae* transcripts based on *An. quadriannulatus* Illumina sequences

| Transcripts          | Length | An. quad female alignments | An. quad male alignments | RCQ   |
|----------------------|--------|----------------------------|--------------------------|-------|
| YG14 (AGAP010306-RA) | 1000   | 493                        | 2677                     | 0.184 |

## **S8. Phylogeny reconstruction and coalescent simulations.**

Overlapping fragments of *YG2* were PCR-amplified using male-specific primers (**Table S21**). Genomic template DNA was sourced from individual adult male and female mosquitoes sampled from colonies and natural populations, as follows: *An. gambiae* NDKO colony and Cameroon field collections in 2007 (36); *An. coluzzii* SUCAM colony; *An. arabiensis* Dongola colony and Cameroon field collections in 2007 (36); *An. quadriannulatus* SANGWE colony and Zimbabwe field collections in 1986 (37); *An. merus* MAF and Ophansi colonies. Each 25 $\mu$ l PCR reaction included 1x PCR buffer, 0.2mM each dNTP, 1.4mM MgCl<sub>2</sub>, 0.4 $\mu$ M each forward and reverse primer, 1U Taq polymerase, and 1 $\mu$ l of genomic DNA. Gel electrophoresis (2% agarose) revealed amplification of expected Y fragments in males but not in females. PCR products for each individual male were purified using USB ExoSAP-IT and directly sequenced on both strands using an Applied Biosystems 3730xl DNA Analyzer and Big Dye Terminator v3.1 chemistry. The CQ values of the amplicons (**Table S22**) are consistent with their Y-linkage. Sequences were concatenated and aligned using the online tool Clustal Omega ([www.ebi.ac.uk/Tools/msa/clustalo/](http://www.ebi.ac.uk/Tools/msa/clustalo/)). The aligned sequences were imported into SeaView v4 (38) for manual inspection of the alignment. Maximum likelihood phylogenetic estimation was performed under a generalized time-reversible model of sequence evolution (39), using PhyML (40) through SeaView, with node support estimated by nonparametric bootstrap (100 replicates). Due to the absence of an outgroup, midpoint rooting was employed.

To assess the relative probability that the observed gene tree on the Y chromosome is due to incomplete lineage sorting versus introgression, we ran coalescent simulations without introgression. Employing the species tree and divergence times for *An. gambiae*, *arabiensis*,

*quadriannulatus* and *merus* that were defined in ref. (41), we used the program “ms” (42) to generate 1000 gene trees using the following command line arguments:

```
ms 4 1000 -T -I 4 1 1 1 1 -ej 1.28 3 2 -ej 1.84 4 2 -ej 1.85 1 2
```

In this species tree *An. gambiae* and *An. arabiensis* are not sister taxa. Therefore, to assess the probability that a gene tree placing them together (as observed for the Y chromosome) is due to ILS alone, for each simulated gene tree we asked whether these two species were sister to one another. In 62 of the 1000 gene trees *gambiae* and *arabiensis* were placed together, which indicates that the probability of seeing this topology on the Y chromosome by chance (*i.e.* ILS alone) is 0.062.

**Table S21.** Primers used to amplify Y-specific regions of *YG2*

| <b>Primer</b> | <b>Sequence (5'-3')</b>  |
|---------------|--------------------------|
| <b>P345-F</b> | CGGCGAGTGATACAGAACCC     |
| <b>P345-R</b> | GAGAAGAAATCATCCAGCCATGTT |
| <b>P339-F</b> | CGATCAATAATGCGGCAGCTC    |
| <b>P339-R</b> | GTTGCGGTCTGCGAAGAGAA     |
| <b>YC4-F</b>  | AATAATGGTTGCGTGCTGGTG    |
| <b>YC4-R</b>  | GTTCTGTATCACTCGCCGGT     |

**Table S22.** CQs of representative *YG2* sequences used for phylogenetic reconstruction across the *An. gambiae* complex. CQs were calculated with default parameters (Bowtie -v 0 -a) against sequenced male-specific PCR products

|                 | <i>An. gambiae</i> G3 |     |     | <i>An. gambiae</i> Pimperena |     |     | <i>An. gambiae</i> Asembo |     |     | <i>An. quadriannulatus</i> |      |     | <i>An. arabiensis</i> |     |        | <i>An. merus</i> |     |       |
|-----------------|-----------------------|-----|-----|------------------------------|-----|-----|---------------------------|-----|-----|----------------------------|------|-----|-----------------------|-----|--------|------------------|-----|-------|
|                 | F                     | M   | CQ  | F                            | M   | CQ  | F                         | M   | CQ  | F                          | M    | CQ  | F                     | M   | CQ     | F                | M   | CQ    |
| <b>ndko</b>     | 0                     | 390 | 0   | 0                            | 166 | 0   | 0                         | 156 | 0   | 0                          | 0    | N/A | 0                     | 28  | 0      | 0                | 0   | N/A   |
| <b>sucam</b>    | 0                     | 443 | 0   | 0                            | 203 | 0   | 0                         | 179 | 0   | 0                          | 0    | N/A | 0                     | 28  | 0      | 0                | 0   | N/A   |
| <b>gamb1892</b> | 0                     | 240 | 0   | 0                            | 43  | 0   | 0                         | 24  | 0   | 0                          | 0    | N/A | 0                     | 16  | 0      | 0                | 0   | N/A   |
| <b>gamb1889</b> | 0                     | 926 | 0   | 0                            | 301 | 0   | 0                         | 304 | 0   | 0                          | 79   | 0   | 0                     | 105 | 0      | 0                | 0   | N/A   |
| <b>arab</b>     | 0                     | 136 | 0   | 0                            | 42  | 0   | 0                         | 19  | 0   | 0                          | 10   | 0   | 1                     | 391 | 0.0025 | 0                | 0   | N/A   |
| <b>arab0590</b> | 0                     | 168 | 0   | 0                            | 52  | 0   | 0                         | 25  | 0   | 0                          | 44   | 0   | 1                     | 460 | 0.0021 | 0                | 0   | N/A   |
| <b>arab0592</b> | 0                     | 145 | 0   | 0                            | 45  | 0   | 0                         | 19  | 0   | 0                          | 10   | 0   | 1                     | 412 | 0.0024 | 0                | 0   | N/A   |
| <b>quad</b>     | 0                     | 23  | 0   | 0                            | 17  | 0   | 0                         | 0   | N/A | 0                          | 970  | 0   | 0                     | 8   | 0      | 0                | 0   | N/A   |
| <b>quad0027</b> | 0                     | 66  | 0   | 0                            | 28  | 0   | 0                         | 6   | 0   | 0                          | 1133 | 0   | 0                     | 11  | 0      | 0                | 0   | N/A   |
| <b>quad0046</b> | 0                     | 66  | 0   | 0                            | 28  | 0   | 0                         | 6   | 0   | 0                          | 1162 | 0   | 0                     | 11  | 0      | 0                | 0   | N/A   |
| <b>maf</b>      | 0                     | 0   | N/A | 0                            | 0   | N/A | 0                         | 0   | N/A | 0                          | 0    | N/A | 0                     | 0   | N/A    | 2                | 651 | 0.003 |
| <b>ophs0001</b> | 0                     | 0   | N/A | 0                            | 0   | N/A | 0                         | 0   | N/A | 0                          | 0    | N/A | 0                     | 0   | N/A    | 2                | 574 | 0.003 |

## SI Appendix References

1. Koren S, *et al.* (2013) Reducing assembly complexity of microbial genomes with single-molecule sequencing. *Genome Biology* 14:R101.
2. Koren S, *et al.* (2012) Hybrid error correction and de novo assembly of single-molecule sequencing reads. *Nat. Biotechnol.* 30:693-700.
3. Chaisson M & Tesler G (2012) Mapping single molecule sequencing reads using basic local alignment with successive refinement (BLASR): application and theory. *BMC Bioinformatics* 13:238.
4. Treangen TJ, Sommer DD, Angly FE, Koren S, & Pop M (2002) Next Generation Sequence Assembly with AMOS. *Current Protocols in Bioinformatics*, (John Wiley & Sons, Inc.).
5. Chin CS, *et al.* (2013) Nonhybrid, finished microbial genome assemblies from long-read SMRT sequencing data. *Nat Methods* 10:563-569.
6. Wood D & Salzberg S (2014) Kraken: ultrafast metagenomic sequence classification using exact alignments. *Genome Biology* 15:R46.
7. Langmead B, Trapnell C, Pop M, & Salzberg SL (2009) Ultrafast and memory-efficient alignment of short DNA sequences to the human genome. *Genome Biol* 10:R25.
8. Garrison E & Marth G (2012) Haplotype-based variant detection from short-read sequencing. *arXiv preprint arXiv:1207.3907 [q-bio.GN]*
9. Hall AB, *et al.* (2013) Six novel Y chromosome genes in *Anopheles* mosquitoes discovered by independently sequencing males and females. *BMC Genomics* 14:273.
10. Lobo NF, *et al.* (2010) Breakpoint structure of the *Anopheles gambiae* 2Rb chromosomal inversion. *Malar J* 9:293.
11. Santolamazza F, Della Torre A, & Caccone A (2004) Short report: A new polymerase chain reaction-restriction fragment length polymorphism method to identify *Anopheles arabiensis* from *An. gambiae* and its two molecular forms from degraded DNA templates or museum samples. *Am. J. Trop. Med. Hyg.* 70:604-606.
12. Galizi R, *et al.* (2014) A synthetic sex ratio distortion system for the control of the human malaria mosquito. *Nat Commun* 5:3977.
13. Dobin A, *et al.* (2013) STAR: ultrafast universal RNA-seq aligner. *Bioinformatics* 29:15-21.
14. Langmead B & Salzberg SL (2012) Fast gapped-read alignment with Bowtie 2. *Nat Methods* 9:357-359.
15. Anders S, Pyl PT, & Huber W (2015) HTSeq--a Python framework to work with high-throughput sequencing data. *Bioinformatics* 31:166-169.



16. Anders S & Huber W (2010) Differential expression analysis for sequence count data. *Genome Biol* 11:R106.
17. Krzywinski J, Nusskern D, Kern M, & Besansky NJ (2004) Isolation and characterization of Y chromosome sequences from the African malaria mosquito *Anopheles gambiae*. *Genetics* 166:1291-1302.
18. Li H (2013) Aligning sequence reads, clone sequences and assembly contigs with BWA-MEM. *arXiv:1303.3997v2 [q-bio.GN]*.
19. Carvalho AB & Clark AG (2013) Efficient identification of Y chromosome sequences in the human and Drosophila genomes. *Genome Res.* 23:1894-1907.
20. Quinlan AR & Hall IM (2010) BEDTools: a flexible suite of utilities for comparing genomic features. *Bioinformatics* 26:841-842.
21. Smit AFA, Hubley R, & Green P (2013-2015) (RepeatMasker Open-4.0, <http://www.repeatmasker.org>).
22. Krzywinski J, Sangare D, & Besansky NJ (2005) Satellite DNA from the Y chromosome of the malaria vector *Anopheles gambiae*. *Genetics* 169:185-196.
23. Rohr CJ, Ranson H, Wang X, & Besansky NJ (2002) Structure and evolution of *mtanga*, a retrotransposon actively expressed on the Y chromosome of the African malaria vector *Anopheles gambiae*. *Mol. Biol. Evol.* 19:149-162.
24. Fu L, Niu B, Zhu Z, Wu S, & Li W (2012) CD-HIT: accelerated for clustering the next-generation sequencing data. *Bioinformatics* 28:3150-3152.
25. Coulibaly MB, *et al.* (2007) Segmental duplication implicated in the genesis of inversion 2Rj of *Anopheles gambiae*. *PLoS ONE* 2:e849.
26. Timoshevskiy VA, Sharma A, Sharakhov IV, & Sharakhova MV (2012) Fluorescent in situ hybridization on mitotic chromosomes of mosquitoes. *JoVE* 67:e4215.
27. Rozen S & Skaletsky HJ (2000) Primer3 on the WWW for general users and for biologist programmers. *Bioinformatics Methods and Protocols: Methods in Molecular Biology*, eds Krawetz S & Misener S (Humana Press, Totowa, NJ), pp 365-386.
28. George P, Sharma A, & Sharakhov IV (2014) 2D and 3D chromosome painting in malaria mosquitoes. *JoVE* 83:e51173.
29. Besansky NJ, *et al.* (1995) Cloning and characterization of the white gene from *Anopheles gambiae*. *Insect Mol. Biol.* 4:217-231.
30. Benson G (1999) Tandem repeats finder: a program to analyze DNA sequences. *Nucleic Acids Res.* 27:573-580.
31. Grabherr MG, *et al.* (2011) Full-length transcriptome assembly from RNA-Seq data without a reference genome. *Nat. Biotechnol.* 29:644-652.

32. Trapnell C, *et al.* (2012) Differential gene and transcript expression analysis of RNA-seq experiments with TopHat and Cufflinks. *Nature Protocols* 7:562–578.
33. Rozen S, *et al.* (2003) Abundant gene conversion between arms of palindromes in human and ape Y chromosomes. *Nature* 423:873-876.
34. Marçais G & Kingsford C (2011) A fast, lock-free approach for efficient parallel counting of occurrences of k-mers. *Bioinformatics* 27:764-770.
35. Neafsey DE, *et al.* (2015) Highly evolvable malaria vectors: the genomes of 16 *Anopheles* mosquitoes. *Science* 347:1258522.
36. Cheng C, *et al.* (2012) Ecological genomics of *Anopheles gambiae* along a latitudinal cline: a population-resequencing approach. *Genetics* 190:1417-1432.
37. Collins FH, *et al.* (1988) Comparison of DNA-probe and isoenzyme methods for differentiating *Anopheles gambiae* and *Anopheles arabiensis* (Diptera: Culicidae). *J. Med. Entomol.* 25:116-120.
38. Gouy M, Guindon S, & Gascuel O (2010) SeaView version 4: a multiplatform graphical user interface for sequence alignment and phylogenetic tree building. *Mol. Biol. Evol.* 27:221-224.
39. Yang Z (1994) Maximum likelihood phylogenetic estimation from DNA sequences with variable rates over sites: approximate methods. *J. Mol. Evol.* 39:306-314.
40. Guindon S, *et al.* (2010) New algorithms and methods to estimate maximum-likelihood phylogenies: assessing the performance of PhyML 3.0. *Syst. Biol.* 59:307-321.
41. Fontaine MC, *et al.* (2015) Extensive introgression in a malaria vector species complex revealed by phylogenomics. *Science* 347:1258524.
42. Hudson RR (2002) Generating samples under a Wright-Fisher neutral model of genetic variation. *Bioinformatics* 18:337-338.
